# Supplementary material for: Associations of statin use with 30-day adverse outcomes among 4 801 406 US Veterans with and without SARS-CoV-2: an observational cohort study
Source: PubMed Central journal article supplement — BMJ Open. 2022 Mar 18;12(3):e058363. doi: 10.1136/bmjopen-2021-058363 (PMC8889446; doi:10.1136/bmjopen-2021-058363), 2022-03-18
Supplement: bmjopen-2021-058363.draft_revisions.pdf [file bmjopen-2021-058363.draft_revisions.pdf]

# BMJ Open

BMJ Open is committed to open peer review. As part of this commitment we make the peer review history of every article we publish publicly available.

When an article is published we post the peer reviewers' comments and the authors' responses online. We also post the versions of the paper that were used during peer review. These are the versions that the peer review comments apply to.

The versions of the paper that follow are the versions that were submitted during the peer review process. They are not the versions of record or the final published versions. They should not be cited or distributed as the published version of this manuscript.

BMJ Open is an open access journal and the full, final, typeset and author-corrected version of record of the manuscript is available on our site with no access controls, subscription charges or pay-per-view fees (<http://bmjopen.bmj.com>).

If you have any questions on BMJ Open's open peer review process please email [info.bmjopen@bmj.com](mailto:info.bmjopen@bmj.com)

# BMJ Open

## Associations of statin use with 30-day adverse outcomes among 4,801,406 Veterans with and without SARS-CoV-2

|                               |                                                                                                                                                                                                                                                                                                                                                                                                                                                                                                                                                                                                                                                                                                                                                                                                                                                                                                                                             |
|-------------------------------|---------------------------------------------------------------------------------------------------------------------------------------------------------------------------------------------------------------------------------------------------------------------------------------------------------------------------------------------------------------------------------------------------------------------------------------------------------------------------------------------------------------------------------------------------------------------------------------------------------------------------------------------------------------------------------------------------------------------------------------------------------------------------------------------------------------------------------------------------------------------------------------------------------------------------------------------|
| Journal:                      | <i>BMJ Open</i>                                                                                                                                                                                                                                                                                                                                                                                                                                                                                                                                                                                                                                                                                                                                                                                                                                                                                                                             |
| Manuscript ID                 | bmjopen-2021-058363                                                                                                                                                                                                                                                                                                                                                                                                                                                                                                                                                                                                                                                                                                                                                                                                                                                                                                                         |
| Article Type:                 | Original research                                                                                                                                                                                                                                                                                                                                                                                                                                                                                                                                                                                                                                                                                                                                                                                                                                                                                                                           |
| Date Submitted by the Author: | 14-Oct-2021                                                                                                                                                                                                                                                                                                                                                                                                                                                                                                                                                                                                                                                                                                                                                                                                                                                                                                                                 |
| Complete List of Authors:     | Wander, Pandora; VA Puget Sound Health Care System Seattle Division; University of Washington, Department of Medicine<br>Lowy, Elliott; Veterans Affairs Puget Sound Health Care System; University of Washington, Department of Health Systems and Population Health<br>Beste, Lauren A.; Veterans Affairs Puget Sound Health Care System; University of Washington, Department of Medicine<br>Tulloch-Palomino, Luis; Veterans Affairs Puget Sound Health Care System; University of Washington, Department of Medicine<br>Korpak, Anna; Veterans Affairs Puget Sound Health Care System<br>Peterson, Alexander; Veterans Affairs Puget Sound Health Care System<br>Kahn, Steven E.; University of Washington<br>Danaei, Goodarz; Harvard School of Public Health, Department of Global Health and Population<br>Boyko, Edward J.; Veterans Affairs Puget Sound Health Care System, Seattle Epidemiologic Research and Information Center |
| Keywords:                     | COVID-19, Epidemiology < TROPICAL MEDICINE, INTERNAL MEDICINE                                                                                                                                                                                                                                                                                                                                                                                                                                                                                                                                                                                                                                                                                                                                                                                                                                                                               |
|                               |                                                                                                                                                                                                                                                                                                                                                                                                                                                                                                                                                                                                                                                                                                                                                                                                                                                                                                                                             |

SCHOLARONE™  
Manuscripts

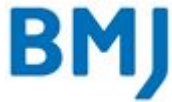

I, the Submitting Author has the right to grant and does grant on behalf of all authors of the Work (as defined in the below author licence), an exclusive licence and/or a non-exclusive licence for contributions from authors who are: i) UK Crown employees; ii) where BMJ has agreed a CC-BY licence shall apply, and/or iii) in accordance with the terms applicable for US Federal Government officers or employees acting as part of their official duties; on a worldwide, perpetual, irrevocable, royalty-free basis to BMJ Publishing Group Ltd ("BMJ") its licensees and where the relevant Journal is co-owned by BMJ to the co-owners of the Journal, to publish the Work in this journal and any other BMJ products and to exploit all rights, as set out in our [licence](#).

The Submitting Author accepts and understands that any supply made under these terms is made by BMJ to the Submitting Author unless you are acting as an employee on behalf of your employer or a postgraduate student of an affiliated institution which is paying any applicable article publishing charge ("APC") for Open Access articles. Where the Submitting Author wishes to make the Work available on an Open Access basis (and intends to pay the relevant APC), the terms of reuse of such Open Access shall be governed by a Creative Commons licence – details of these licences and which [Creative Commons](#) licence will apply to this Work are set out in our licence referred to above.

Other than as permitted in any relevant BMJ Author's Self Archiving Policies, I confirm this Work has not been accepted for publication elsewhere, is not being considered for publication elsewhere and does not duplicate material already published. I confirm all authors consent to publication of this Work and authorise the granting of this licence.

1 **Associations of statin use with 30-day adverse outcomes among 4,801,406 Veterans with and without**  
2 **SARS-CoV-2**  
3  
4  
5

6 **Authors:** Pandora L Wander, MD, MS<sup>a,b</sup>; Elliott Lowy, PhD<sup>a,c</sup>; Lauren A Beste, MD, MSc<sup>a,b</sup>; Luis Tulloch-  
7 Palomino, MD<sup>a,b</sup>; Anna Korpak, PhD<sup>a</sup>; Alexander C Peterson, MSc<sup>a</sup>; Steven E Kahn, MB, ChB<sup>a,b</sup>; Goodarz  
8 Danaei, MD, ScD<sup>d</sup>; Edward J Boyko, MD, MPH<sup>a,b</sup>  
9  
10  
11  
12  
13  
14

15 **Affiliations:**

16  
17 <sup>a</sup>Veterans Affairs Puget Sound Health Care System, Seattle, WA  
18

19 <sup>b</sup>Department of Medicine, University of Washington, Seattle, WA  
20

21 <sup>c</sup>Department of Health Systems and Population Health, University of Washington, Seattle, WA  
22

23 <sup>d</sup>Departments of Global Health and Population, Epidemiology, Harvard T.H. Chan School of Public Health,  
24 Boston, MA  
25  
26  
27  
28  
29

30 Correspondence to:

31 Pandora L. Wander

32 VA Puget Sound Healthcare System

33  
34 1660 S. Columbian Way, S-111-MED

35  
36  
37  
38 Seattle, WA 98108

39  
40 [lwander@u.washington.edu](mailto:lwander@u.washington.edu)  
41

42 ORCID: 0000-0003-3671-1464  
43  
44  
45

46 Running title: Statin use and 30-day outcomes in SAR-CoV-2  
47  
48  
49  
50

51 Word count (not including title, abstract, acknowledgment, references, tables, and figure legends): 2,900  
52  
53  
54  
55  
56  
57  
58  
59  
60

**ABSTRACT**

**Objective:** To estimate associations of statin use with hospitalization, intensive care unit (ICU) admission, and mortality at 30 days among individuals with and without a positive test for SARS-CoV-2

**Design:** Retrospective cohort study

**Setting:** U.S. Veterans Health Administration (VHA)

**Participants:** All Veterans receiving VHA health care with  $\geq 1$  positive nasal swab for SARS-CoV-2 between March 1, 2020 and March 10, 2021 (cases;  $n=231,154$ ) and a comparator group of controls comprising all Veterans who did not have a positive nasal swab for SARS-CoV-2 but who did have  $\geq 1$  clinical lab test performed during the same time period ( $n=4,570,252$ ).

**Main outcomes:** Associations of (1) Any statin use, (2) use of specific statins, or (3) low-/moderate- vs. high-intensity statin use at the time of positive nasal swab for SARS-CoV-2 (cases) or result of clinical lab test (controls) assessed from pharmacy records with hospitalization, ICU admission, and death at 30 days.

**Results:** Among individuals who tested positive for SARS-CoV-2, statin use was associated with lower odds of death at 30 days (OR 0.81 [95%CI 0.77–0.85]) but not with hospitalization or ICU admission. Over the same time period, associations were significantly stronger among individuals without a positive test for SARS-CoV-2: hospitalization OR 0.79 (95%CI 0.77–0.80), ICU admission OR 0.86 (95%CI 0.81–0.90), and death 0.60 (95%CI 0.58–0.62),  $p$  for interaction all  $<0.001$ . Among SARS-CoV-2–positive individuals, associations were similar comparing use of specific statins to no statin. Compared to low-/moderate-intensity statin use, high-intensity statin use was not associated with lower odds of ICU admission or death.

**Conclusions:** Associations of statin use with lower adverse 30-day outcomes are weaker among individuals who tested positive for SARS-CoV-2 compared to individuals without a positive test, indicating that statins do not exert SARS-CoV-2–specific effects.

1  
2 **Funding Source:** VA Clinical Science Research & Development COVID19-8990-19  
3  
4  
5  
6  
7  
8  
9  
10  
11  
12

## 13 **SUMMARY BOXES**

### 14 **What is already known on the topic:**

15  
16  
17  
18 -Statin use at diagnosis is associated with lower risk of hospitalization, mortality in many observational studies  
19  
20 conducted among individuals with COVID-19.

21  
22 -Whether these associations are similar in individuals with and without COVID-19 is unknown  
23  
24  
25

### 26 **What this study adds:**

27  
28 -In this observational study among 231,154 Veterans with a positive nasal swab for SARS-CoV-2 and a  
29  
30 negative control population of 4,570,252 Veterans without a positive test for SARS-CoV-2, statin use was  
31  
32 associated with lower odds of adverse 30-day outcomes in both groups, but associations of statin use with  
33  
34 lower 30-day outcomes were substantially weaker among SARS-CoV-2–positive individuals compared to  
35  
36 individuals without a positive test.

37  
38  
39 -Statins may not exert SARS-CoV-2–specific effects. Existing evidence suggesting a protective association of  
40  
41 statin use with adverse outcomes after COVID-19 may be an artifact of bias, likely due to residual confounding.  
42  
43  
44

### 45 **Strengths and limitations of this study**

- 46  
47  
48 - Large, well characterized national (U.S.) sample  
49  
50 - First study to formally assess and compare statin effects seen in SARS-CoV-2 infection using a  
51  
52 negative control  
53  
54 - Observational design cannot exclude the possibility of residual confounding  
55  
56 - Did not capture hospitalizations or diagnoses occurring outside VHA  
57  
58  
59  
60

## INTRODUCTION

1  
2 New cases of COVID-19/SARS-CoV-2 infection continue to occur at high rates in the United States and  
3  
4 worldwide with few treatments available to decrease mortality. Statin use at the time of COVID-19 diagnosis  
5  
6 has been associated with a lower risk of short-term mortality in observational studies<sup>1</sup> and systematic reviews<sup>2</sup>,  
7  
8 and may have promise for this purpose. However, preliminary findings from a randomized placebo-controlled  
9  
10 trial of patients admitted to the ICU did not show a protective effect of atorvastatin 20 mg/day on 30-day  
11  
12 mortality after COVID-19 diagnosis, among patients not taking statins prior to admission<sup>3</sup>. These paradoxical  
13  
14 findings may reflect the presence of residual confounding in observational studies. In addition, effects of statins  
15  
16 on mortality after COVID-19 may differ across populations, for example, among individuals with or without  
17  
18 cardiovascular disease (CVD), or specific to certain statins but not all medications in this class. Therefore,  
19  
20 observational studies with comprehensive strategies to reduce bias from unmeasured confounding and  
21  
22 examine associations by comorbidities and statin type are needed to improve estimates of the potential causal  
23  
24 effect of statin use at diagnosis on mortality after COVID-19.  
25  
26  
27  
28  
29

30 To address these gaps, we used national data from the Veterans Health Administration (VHA) to quantify the  
31  
32 independent association of statin use at diagnosis with adverse outcomes from COVID-19 at 30 days,  
33  
34 including hospitalization, intensive-care unit (ICU) admission, and mortality. We used the following strategies to  
35  
36 mitigate or estimate bias: 1) directed-acyclic graphs to guide the choice of potential confounders; 2)  
37  
38 comparison of associations among SARS-CoV-2 infected individuals (n=231,154) with associations among an  
39  
40 uninfected comparator sample (n=4,570,252); and 3) a dose-response analysis comparing low- or moderate-  
41  
42 intensity statin use to high-intensity use. In additional analyses, we investigated associations of individual  
43  
44 statins with 30-day outcomes after COVID-19 and evaluated the magnitude of the statin-mortality association  
45  
46 in strata of sex, age, race, BMI, clinical comorbidities, and C-reactive protein (CRP) level prior to diagnosis.  
47  
48  
49  
50

## METHODS

### Study setting and population

55 The Veterans Health Administration (VHA)—the largest integrated healthcare system in the United States—  
56  
57 provides care to more than 7 million Veterans at 170 medical centers and 1,074 outpatient sites<sup>4</sup>. We used  
58  
59

1 data from the Corporate Data Warehouse (CDW), a data repository derived from VHA's integrated electronic  
2 medical record, including a COVID-19 Shared Data Resource, which contains analytic variables for all  
3 enrollees tested for SARS-CoV-2<sup>5</sup>. The study was approved by the institutional review board at VA Puget  
4 Sound Health Care System. The requirement for informed consent was waived.  
5  
6  
7  
8  
9

## 10 **Patient and public involvement**

11 Patients or the public were not involved in the design, or conduct, or reporting, or dissemination plans of our  
12 research  
13  
14  
15

## 16 **Selection of the SARS-CoV-2–positive cohort**

17 We identified all enrollees with one or more positive nasal swabs for SARS-CoV-2 between March 1, 2020,  
18 and March 10, 2021. The index date was defined as the date the first positive test was performed. Most tests  
19 were performed in VA laboratories using US Food and Drug Administration (FDA)–approved RealTime (Abbott  
20 Laboratories) or Xpert-Xpress (Cepheid) SARS-CoV-2 assays. A small number were sent to outside  
21 laboratories.  
22  
23  
24  
25  
26  
27  
28  
29  
30

## 31 **Selection of the SARS-CoV-2–negative cohort**

32 Individuals without a positive nasal swab for SARS-CoV-2 and with any clinical lab test available in the medical  
33 record between March 1, 2020, and March 31, 2021, were chosen as a comparison group. A negative nasal  
34 swab for SARS-CoV-2 was not required for inclusion. Participants without a positive nasal swab for SARS-  
35 CoV-2 were assigned an index month during the study period for which they had a lab result, and a random  
36 index date during the index month which was used as the start of follow-up.  
37  
38  
39  
40  
41  
42  
43  
44  
45  
46  
47

## 48 **Exposure**

49 Statin use was defined as receipt of a statin prescription with a fill date prior to the index date and a quantity  
50 prescribed that would extend past the index date. Statin intensity was defined as low, moderate, or high using  
51 definitions from the American Heart Association/American College of Cardiology guidelines on management of  
52  
53  
54  
55  
56  
57  
58  
59  
60



1 cholesterol<sup>6</sup>. Prescribing data were available for the following specific statins: Atorvastatin, fluvastatin,  
2 lovastatin, pitavastatin, pravastatin, rosuvastatin, simvastatin.  
3  
4  
5

## 6 **Covariates**

8 We collected data on age, sex, race/ethnicity, VHA facility location, and urban, rural, or highly rural residence  
9 using a validated classification scheme that has been previously described<sup>7</sup>. Body mass index (BMI) was  
10 defined as weight in kg divided by (height in meters)<sup>2</sup>. Smoking status was classified as current, former, or  
11 never based on VHA health factors data. If no smoking code was entered, the participant was classified as  
12 never smoked. At-risk drinking was defined using a score  $\geq 3$  for men and  $\geq 4$  for women on the Alcohol Use  
13 Disorders Identification Test consumption questions (AUDIT-C)<sup>8</sup>. Comorbidities (hypertension (HTN), CVD,  
14 and heart failure) were identified using ICD-9-CM and -10 codes entered after October 1, 1999, the date when  
15 VHA began using a universal electronic health record<sup>9</sup>. We defined chronic kidney disease (CKD) by  
16 categories of estimated glomerular filtration rate<sup>10</sup> using the most recent creatinine at least 3 days, but not  
17 more than 1 year, before the index date. For individuals with data available on CRP at least 14 days but not  
18 more than six months before the index date (n=27,630), we dichotomized CRP values as normal or elevated  
19 based on cut points provided for each assay at the testing site because a variety of assays for these  
20 biomarkers are used across the VA system. We also controlled for prior statin use to approximate a  
21 comparison of incident users and non-users. We defined prior statin use as receipt of a statin prescription with  
22 a fill date that included the time period six months prior to the index date.  
23  
24  
25  
26  
27  
28  
29  
30  
31  
32  
33  
34  
35  
36  
37  
38  
39  
40  
41

## 42 **Outcomes**

44 We collected data on all hospitalizations, ICU admissions, and deaths occurring through March 10, 2021.  
45 Deaths were verified by official sources including VHA Patient Treatment File, the Beneficiary Identification  
46 Records Locator Subsystem (BIRLS), and VA/CMS Medicare Vital Status File; Social Security Administration  
47 (SSA) Death Master File; death certificates, and VHA National Cemetery Administration<sup>11</sup>.  
48  
49  
50  
51  
52  
53  
54

## 55 **Statistical analyses**

1 We summarized baseline characteristics for SARS-CoV-2 infected and uninfected participants, stratified by  
2 statin use at the index date. We used multiple imputation with 10 sets of imputations for analyses that included  
3 BMI or CKD due to approximately 20% missing values for each of these variables. We used DAGitty<sup>12</sup> to  
4 generate a directed acyclic graph (DAG) to assist in variable selection. We fit separate logistic regression  
5 models for individuals with and without a positive swab for SARS-CoV-2, testing the association of statin use at  
6 index date with occurrence of hospitalization, ICU admission, and death, adjusting for the minimal sufficient  
7 covariate set to estimate the total effect of statin use according to our DAG (statin use  $\geq$  six months prior to  
8 diagnosis, sex, age, race/ethnicity, BMI, tobacco use, facility location, urban/rural status, eGFR, and history of  
9 diabetes, hypertension, cardiovascular disease, heart failure, and alcohol use disorder) separately. In  
10 combined models, we tested for the presence of multiplicative first-order interactions to determine whether the  
11 association between statins and odds of hospitalization, ICU admission, and death at 30 days differed between  
12 persons with and without a positive swab for SARS-CoV-2. In a sensitivity analysis, we examined associations  
13 of statin use at diagnosis with occurrence of hospitalization, ICU admission, and death in models that were not  
14 adjusted for statin use six months prior to diagnosis.

15 Among individuals with a positive swab for SARS-CoV-2, we fit logistic regression models examining  
16 associations of specific statins compared to no statin use with outcomes adjusted for sex, age, race/ethnicity,  
17 BMI, tobacco use, facility location, urban/rural status, eGFR, and history of diabetes, hypertension,  
18 cardiovascular disease, heart failure, and alcohol use disorder, as well as models comparing low-intensity to  
19 moderate- or high-intensity statin use. We evaluated the magnitude of the statin-mortality association in strata  
20 of sex, age, race, BMI, clinical comorbidities, and prior CRP concentration and tested for first-order  
21 multiplicative interactions by using interaction terms in combined models.

### 22 **Role of the funding source**

23 The analysis was funded by VA Clinical Science Research & Development, which had no role in its design,  
24 conduct, analysis, or reporting.

## 25 **RESULTS**

1 SARS-CoV-2 infected participants were 60.9 years old ( $\pm 16.5$ ) on average, and 10% percent ( $n = 23,974$ ) were  
2 female. Thirty percent (69,263) had an active statin prescription at enrollment. During the 30 days after  
3 diagnosis, 14% (32,490) of SARS-CoV-2 infected participants were hospitalized, 3% (6,140) were admitted to  
4 the ICU, and 5% (12,111) died. SARS-COV-2 uninfected participants were 61.6 years old ( $\pm 16.7$ ) on average,  
5 and 13% (577,718) were female. Thirty percent (1,389,364) had an active statin prescription at enrollment.  
6 During the 30 days after the index date, 2% (91,604) were hospitalized, 0.2% (9,298) were admitted to the  
7 ICU, and 0.4% died ( $n = 19,298$ ) (**Table 1**).

8  
9  
10  
11  
12  
13  
14  
15  
16  
17 Among SARS-COV-2 positive individuals, statin use was associated with lower odds of death at 30 days (OR  
18 0.81 [95%CI 0.77–0.85]), but not with hospitalization or ICU admission. Among SARS-COV-2 negative  
19 individuals, statin use was associated with lower odds of hospitalization (OR 0.79 [95%CI 0.77–0.80]), ICU  
20 admission (OR 0.86 [95%CI 0.81–0.90]), and death at 30 days (OR 0.60 [95%CI 0.58–0.62]). (**Table 2a**).  
21 Compared to persons with SARS-CoV-2 infection, OR for all three outcomes were significantly lower in  
22 persons without SARS-CoV-2 infection, as reflected by  $p < 0.001$  for the interaction term of SARS-CoV-2\*statin  
23 use in all three models. Among individuals with and without SARS-CoV-2 infection, adjustment for receipt of  
24 statin six months prior to baseline attenuated the magnitude of the association of statin use at diagnosis with  
25 all outcomes (**Fig. 1, Table 2b**). Among persons with SARS-CoV-2 infection, associations with outcomes were  
26 similar for individual statins (**Table 3**). Compared to low-/moderate-intensity, high-intensity statin use was  
27 associated with higher odds of hospitalization (1.06 [95%CI 1.01–1.10]) but not with ICU admission or death  
28 (**Table 4**). Among persons with SARS-CoV-2 infection, associations of statin use with hospitalization differed  
29 across strata of sex, age, race (Black vs. non-Black), and eGFR (e.g., OR for hospitalization in Black  
30 participants 0.98 [95%CI 0.92–1.03], OR for hospitalization in non-Black participants 0.92 [95%CI 0.89–0.95],  $p$   
31 for interaction = 0.022). Associations of statin use with ICU admission differed across strata of sex and  
32 ethnicity (Latinx vs. not Latinx) (e.g., OR for ICU admission in Latinx participants 0.77 [95%CI 0.62–0.95], OR  
33 for ICU admission in non-Latinx participants 0.94 [95%CI 0.89–1.00],  $p$  for interaction = 0.044). Associations of  
34 statin use with mortality differed across strata of age, race/ethnicity (white vs. non-white and Black vs. non-  
35 Black), and BMI (e.g., OR for mortality in Black participants 0.83 [95%CI 0.76–0.92], OR for mortality in non-  
36  
37  
38  
39  
40  
41  
42  
43  
44  
45  
46  
47  
48  
49  
50  
51  
52  
53  
54  
55  
56  
57  
58  
59  
60

1 Black participants 0.77 [95%CI 0.74–0.81], p for interaction = 0.006). Associations did not differ across strata  
2 of prevalent diabetes, hypertension, or CVD (**Supplementary Fig. 1–3**).  
3  
4  
5  
6

## 7 **CONCLUSIONS**

8  
9 In this cohort of U.S. Veterans with (n=231,154) and without (n=4,570,252) a positive respiratory swab for  
10 SARS-CoV-2, statin use was independently associated with lower odds of death at 30 days compared to no  
11 statin use, but this association over a similar time period was significantly stronger among Veterans without a  
12 positive respiratory swab for SARS-CoV-2. Among individuals with and without a positive respiratory swab for  
13 SARS-CoV-2, adjusting for prior statin use attenuated the association of statin use with all outcomes; however,  
14 in every case the magnitude of the association remained substantially greater among individuals without a  
15 diagnosis of COVID-19. Associations were similar for specific statins, and receipt of high-potency statin was  
16 not associated with lower odds of any outcome compared to moderate and low potency, except for a small  
17 difference in the odds of hospitalization. Associations were not significantly different in strata of prevalent  
18 diabetes, hypertension, or cardiovascular disease. Furthermore, the lack of a gradient of effect with statin  
19 potency also does not support a potential causal benefit of statin use. Taken together, these results suggest  
20 that while statin use is associated with lower mortality among individuals with a positive swab for SARS-CoV-2,  
21 the benefit is actually smaller for than it is for those without evidence of SARS-CoV-2 infection and does not  
22 support a possible anti-COVID effect of statin treatment.  
23  
24  
25  
26  
27  
28  
29  
30  
31  
32  
33  
34  
35  
36  
37  
38  
39  
40

41 Use of negative controls is an important technique to detect confounding or other sources of bias in  
42 epidemiological studies<sup>13</sup> that has gone underutilized in the era of COVID-19 research. An instructive example  
43 is the association of pneumonia or influenza vaccination with all-cause mortality seen in elderly individuals  
44 despite rigorous control for confounding by factors related to overall health status<sup>14</sup>. Using negative controls,  
45 Jackson et al. examined the association of vaccination with a negative control outcome: mortality prior to  
46 influenza season<sup>15</sup>. They found a stronger association with mortality during the period prior to influenza season  
47 compared to during or after, a biologically implausible result that was attributed by the authors to preferential  
48 receipt of vaccines by healthy individuals. This source of bias is now recognized in studies of this topic<sup>16</sup>. While  
49  
50  
51  
52  
53  
54  
55  
56  
57  
58  
59  
60

1 the use of a negative control outcome is not precisely analogous to the methods used in the current study, the  
2 example can inform interpretation of the current findings.  
3  
4  
5

6 Several recent systematic reviews and meta-analyses have examined the association of prior statin use with  
7 short-term outcomes after COVID-19<sup>2,17-22</sup>. Many of these reported an inverse association of statin use at  
8 diagnosis with mortality. For example, statin use was associated with a lower hazard of death (HR 0.72 [95%CI  
9 0.69–0.75]) in a large population-based study of English patients with diabetes independent of age and co-  
10 morbid CVD<sup>23</sup>. In a recent nationwide U.S. study of hospitalized individuals (n=10,541), outpatient statin, either  
11 alone or with blood pressure-lowering medications, was associated with lower odds of in-hospital death (OR  
12 0.59 [95%CI 0.50–0.69]). The magnitude of the association of statin use at diagnosis with mortality reported in  
13 these and other analyses is quite similar to the OR in the current report among individuals with COVID-19 in  
14 models that were not adjusted for prior statin use (OR for death at 30 days 0.78 [95% CI 0.75–0.82]), likely  
15 reflecting similar strategies for confounder adjustment. The lower COVID-19 mortality risk among statin users,  
16 however, is not a universal finding. In fact, among French hospitalized patients with diabetes, statin use at  
17 diagnosis was associated with higher odds of death at 28 days (OR 1.46 [95% CI 1.08–1.95])<sup>24</sup>. Reasons for  
18 these disparate findings are unclear but may be due in part to differences in timing, as early in the pandemic,  
19 treatments such as dexamethasone and remdesivir were not widely used. Consistent with this, in the French  
20 cohort mortality was about 21% at 28 days, considerably higher than our overall 30-day mortality rate of about  
21 7%. No prior study to our knowledge has examined outcomes following statin use comparing SARS-CoV-2  
22 infected and uninfected statin users.  
23  
24  
25  
26  
27  
28  
29  
30  
31  
32  
33  
34  
35  
36  
37  
38  
39  
40  
41  
42  
43

44 We noted several differences in outcomes associated with statin use by certain characteristics such as sex,  
45 age, and race (Supplementary Fig. 1-3). As our main analysis did not show evidence of a lower risk of  
46 outcomes associated with statin use confined to COVID-19 infected participants, these interactions likely  
47 reflect associations independent of presence of this infection and therefore reflecting effect modification  
48 between statin use, stratum variables, and outcomes of interest.  
49  
50  
51  
52  
53  
54  
55  
56  
57  
58  
59  
60

Our study has several strengths, most importantly a large, well characterized national sample. To our knowledge, this is the largest observational study of prior statin use and adverse outcomes from SARS-CoV-2 in the United States (n=4,801,406) as well as the first to formally assess and compare statin effects seen in SARS-CoV-2 infection using a negative control (non-infected statin users). Second, we used several methods designed to mitigate or quantify bias due to unmeasured confounding. We: 1) constructed a DAG to estimate the minimal sufficient adjustment set to estimate the total effect of statin use on 30-day outcomes; 2) compared associations in SARS-CoV-2 infected individuals and an uninfected comparator sample; and 3) conducted dose-response analyses using statin potency to reflect dose. In addition, most VHA enrollees receive medical care and medications without cost, which likely decreases the contribution of unmeasured financial factors to differences in the quality of care received and most importantly to receipt of statin medications. Our results should be considered within the context of several limitations. The VHA population is generally older, with lower income and socioeconomic status<sup>25</sup> than the U.S. population as a whole, and our findings may not be generalizable to non-VHA populations. Additionally, the proportion of women was low (13%); however, although women comprised only a small proportion of the sample, the number of female participants (n=601,765) is adequate for robust statistical inference. We were also unable to capture hospitalizations or some outpatient prescriptions that occurred outside VHA, although VHA users are asked to provide notification within 72 hours of an outside hospital admission, and when possible are transferred to a VHA facility, which would then be captured in the VHA electronic health record. Finally, not all individuals in the comparator group were tested for SARS-CoV-2, so we were unable to exclude the possibility that some participants were misclassified. We elected to include individuals without SARS-CoV-2 tests because individuals with indications for SARS-CoV-2 testing may represent a particular (and sicker) population than the general group of VA enrollees as a whole. Further, based on the current results, inclusion of individuals with undiagnosed COVID-19 in the SARS-CoV-2–negative comparator group would be expected to attenuate observed associations of statin use with adverse outcomes. It is unlikely that exclusion of participants with undiagnosed COVID-19 from the comparator group would have resulted in a reduction in the observed negative association between statin use and mortality, as this would have required an opposite association to be present between undiagnosed COVID-19 infection and mortality, a possibility for which there is little reason or evidence to support.

1 In conclusion, statin use is associated with lower odds of 30-day mortality both among U.S. Veterans with or  
2 without a positive respiratory swab for SARS-CoV-2 indicating that statins may not exert COVID-19-specific  
3 beneficial effects.  
4  
5  
6  
7

8 **FUNDING.** The work was funded by VA Clinical Science Research & Development COVID19-8990-19  
9  
10  
11  
12  
13

14 **COMPETING INTERESTS.** There are no relevant conflicts of interest to disclose.  
15  
16  
17

18 **DATA AVAILABILITY.** Access to VA electronic health records data is limited to researchers with active, VA  
19 appointments and an IRB-approved protocol.  
20  
21  
22  
23  
24

25 **CONTRIBUTORSHIP.** PLW conceived the project, designed the overall research plan, and wrote the first draft  
26 of the manuscript. EL analyzed the data and reviewed/edited the manuscript, LB contributed to the conception  
27 of the work and reviewed/edited the manuscript, LTP contributed to the conception of the work and  
28 reviewed/edited the manuscript, AK contributed to design/interpretation of the analyses and reviewed/edited  
29 the manuscript, AP contributed to the design/interpretation of the analyses and reviewed/edited the  
30 manuscript. SEK contributed to the conception of the work and reviewed/edited the manuscript. GD contributed  
31 to the design/interpretation of the analyses and reviewed/edited the manuscript. EJB conceived the project,  
32 designed the overall research plan, and reviewed/edited the manuscript.  
33  
34  
35  
36  
37  
38  
39  
40  
41  
42  
43

44 **LICENCE.** The Corresponding Author has the right to grant on behalf of all authors and does grant on behalf of  
45 all authors, [a worldwide licence](#) to the Publishers and its licensees in perpetuity, in all forms, formats and  
46 media (whether known now or created in the future), to i) publish, reproduce, distribute, display and store the  
47 Contribution, ii) translate the Contribution into other languages, create adaptations, reprints, include within  
48 collections and create summaries, extracts and/or, abstracts of the Contribution, iii) create any other derivative  
49 work(s) based on the Contribution, iv) to exploit all subsidiary rights in the Contribution, v) the inclusion of  
50  
51  
52  
53  
54  
55  
56  
57  
58  
59  
60

electronic links from the Contribution to third party material where-ever it may be located; and, vi) licence any third party to do any or all of the above.

**ETHICS STATEMENT.** The study was approved by the institutional review board at VA Puget Sound Health Care System, Seattle, WA, USA (#01897). The requirement for informed consent was waived.

## REFERENCES

1. Daniels LB, Ren J, Kumar K, et al. Relation of prior statin and anti-hypertensive use to severity of disease among patients hospitalized with COVID-19: Findings from the American Heart Association's COVID-19 Cardiovascular Disease Registry. *PLoS one*. 2021;16(7):e0254635.
2. Pal R, Banerjee M, Yadav U, Bhattacharjee S. Statin use and clinical outcomes in patients with COVID-19: An updated systematic review and meta-analysis. *Postgraduate medical journal*. 2021.
3. Rubin R. Could Statins Do More Than Lower Cholesterol in Patients With COVID-19? *JAMA : the journal of the American Medical Association*. 2021.
4. U.S. Department of Veterans Affairs: VHA. <https://www.va.gov/health/>. Accessed 9/28/2020, 2020.
5. CDW COVID-19 Shared Data Resource (intranet-only resource). [https://vhacdwdwhweb100.vha.med.va.gov/phenotype/index.php/COVID-19:Shared\\_Data\\_Resource](https://vhacdwdwhweb100.vha.med.va.gov/phenotype/index.php/COVID-19:Shared_Data_Resource). Accessed 9/28/2020, 2020.
6. Grundy SM, Stone NJ, Bailey AL, et al. 2018 AHA/ACC/AACVPR/AAPA/ABC/ACPM/ADA/AGS/APhA/ASPC/NLA/PCNA Guideline on the Management of Blood Cholesterol: A Report of the American College of Cardiology/American Heart Association Task Force on Clinical Practice Guidelines. *Circulation*. 2019;139(25):e1082-e1143.
7. West AN, Lee RE, Shambaugh-Miller MD, et al. Defining "rural" for veterans' health care planning. *The Journal of rural health : official journal of the American Rural Health Association and the National Rural Health Care Association*. 2010;26(4):301-309.
8. Bush K, Kivlahan DR, McDonnell MB, Fihn SD, Bradley KA. The AUDIT alcohol consumption questions (AUDIT-C): an effective brief screening test for problem drinking. Ambulatory Care Quality Improvement Project (ACQUIP). Alcohol Use Disorders Identification Test. *Archives of internal medicine*. 1998;158(16):1789-1795.
9. Quan H, Sundararajan V, Halfon P, et al. Coding algorithms for defining comorbidities in ICD-9-CM and ICD-10 administrative data. *Medical care*. 2005;43(11):1130-1139.
10. Young BA, Katz R, Boulware LE, et al. Risk Factors for Rapid Kidney Function Decline Among African Americans: The Jackson Heart Study (JHS). *American journal of kidney diseases : the official journal of the National Kidney Foundation*. 2016;68(2):229-239.
11. Sohn MW, Arnold N, Maynard C, Hynes DM. Accuracy and completeness of mortality data in the Department of Veterans Affairs. *Popul Health Metr*. 2006;4:2.
12. Textor J, van der Zander B, Gilthorpe MS, Liskiewicz M, Ellison GT. Robust causal inference using directed acyclic graphs: the R package 'dagitty'. *International journal of epidemiology*. 2016;45(6):1887-1894.
13. Lipsitch M, Tchetgen Tchetgen E, Cohen T. Negative controls: a tool for detecting confounding and bias in observational studies. *Epidemiology*. 2010;21(3):383-388.
14. Rivetti D, Jefferson T, Thomas R, et al. Vaccines for preventing influenza in the elderly. *Cochrane Database Syst Rev*. 2006(3):CD004876.
15. Jackson LA, Jackson ML, Nelson JC, Neuzil KM, Weiss NS. Evidence of bias in estimates of influenza vaccine effectiveness in seniors. *International journal of epidemiology*. 2006;35(2):337-344.
16. Levett-Jones T. Vaccines for preventing influenza in the elderly: A Cochrane review summary. *International journal of nursing studies*. 2020;109:103372.



17. Hariyanto TI, Kurniawan A. Statin and outcomes of coronavirus disease 2019 (COVID-19): A systematic review, meta-analysis, and meta-regression. *Nutrition, metabolism, and cardiovascular diseases : NMCD*. 2021;31(6):1662-1670.
18. Permana H, Huang I, Purwiga A, et al. In-hospital use of statins is associated with a reduced risk of mortality in coronavirus-2019 (COVID-19): systematic review and meta-analysis. *Pharmacol Rep*. 2021;73(3):769-780.
19. Hariyanto TI, Kurniawan A. Statin therapy did not improve the in-hospital outcome of coronavirus disease 2019 (COVID-19) infection. *Diabetes Metab Syndr*. 2020;14(6):1613-1615.
20. Wu KS, Lin PC, Chen YS, Pan TC, Tang PL. The use of statins was associated with reduced COVID-19 mortality: a systematic review and meta-analysis. *Annals of medicine*. 2021;53(1):874-884.
21. Vahedian-Azimi A, Mohammadi SM, Heidari Beni F, et al. Improved COVID-19 ICU admission and mortality outcomes following treatment with statins: a systematic review and meta-analysis. *Arch Med Sci*. 2021;17(3):579-595.
22. Onorato D, Pucci M, Carpena G, Henry BM, Sanchis-Gomar F, Lippi G. Protective Effects of Statins Administration in European and North American Patients Infected with COVID-19: A Meta-Analysis. *Semin Thromb Hemost*. 2021;47(4):392-399.
23. Holman N, Knighton P, Kar P, et al. Risk factors for COVID-19-related mortality in people with type 1 and type 2 diabetes in England: a population-based cohort study. *Lancet Diabetes Endocrinol*. 2020;8(10):823-833.
24. Cariou B, Goronflot T, Rimbert A, et al. Routine use of statins and increased mortality related to COVID-19 in inpatients with type 2 diabetes: Results from the CORONADO study. *Diabetes & metabolism*. 2020.
25. Kondo K, Low A, Everson T, et al. Health Disparities in Veterans: A Map of the Evidence. *Medical care*. 2017;55 Suppl 9 Suppl 2:S9-S15.

**Table 1.** Characteristics of VHA Veterans with and without a positive respiratory swab for SARS-CoV-2 (March 1, 2020–March 10, 2021), stratified by presence of an active statin prescription at enrollment

|                                                                  | Overall     |       | No positive respiratory swab for SARS-CoV-2 |       |                                           |       | ≥1 positive respiratory swab for SARS-CoV-2 |       |                                        |       |
|------------------------------------------------------------------|-------------|-------|---------------------------------------------|-------|-------------------------------------------|-------|---------------------------------------------|-------|----------------------------------------|-------|
|                                                                  | n=4,801,406 |       | No statin prescription<br>n=3,180,888       |       | Active statin prescription<br>n=1,389,364 |       | No statin prescription<br>n=161,891         |       | Active statin prescription<br>n=69,263 |       |
| Age, years                                                       | 61.6        | ±16.7 | 58.3                                        | ±17.7 | 69.3                                      | ±10.8 | 57.8                                        | ±17.5 | 68.0                                   | ±11.4 |
| Age category, years                                              |             |       |                                             |       |                                           |       |                                             |       |                                        |       |
| 19-39                                                            | 661,777     | 14%   | 613,885                                     | 19%   | 15,272                                    | 1%    | 31,645                                      | 20%   | 975                                    | 1%    |
| 40-49                                                            | 482,871     | 10%   | 402,201                                     | 13%   | 54,467                                    | 4%    | 22,718                                      | 14%   | 3,485                                  | 5%    |
| 50-59                                                            | 728,340     | 15%   | 516,328                                     | 16%   | 172,006                                   | 12%   | 29,099                                      | 18%   | 10,907                                 | 16%   |
| 60-69                                                            | 993,105     | 21%   | 600,530                                     | 19%   | 346,361                                   | 25%   | 28,785                                      | 18%   | 17,429                                 | 25%   |
| 70-79                                                            | 1,408,065   | 29%   | 735,949                                     | 23%   | 610,855                                   | 44%   | 33,303                                      | 21%   | 27,958                                 | 40%   |
| 80+                                                              | 525,548     | 11%   | 311,010                                     | 10%   | 189,825                                   | 14%   | 16,204                                      | 10%   | 8,509                                  | 12%   |
| Sex at birth, female                                             | 601,692     | 13%   | 509,443                                     | 16%   | 68,275                                    | 5%    | 20,598                                      | 13%   | 3,376                                  | 5%    |
| Race/ethnicity                                                   |             |       |                                             |       |                                           |       |                                             |       |                                        |       |
| White                                                            | 3,335,105   | 69%   | 2,122,989                                   | 67%   | 1,055,742                                 | 76%   | 106,448                                     | 66%   | 49,926                                 | 72%   |
| Black                                                            | 860,829     | 18%   | 582,091                                     | 18%   | 226,384                                   | 16%   | 38,080                                      | 24%   | 14,274                                 | 21%   |
| Hispanic                                                         | 333,593     | 7%    | 230,848                                     | 7%    | 79,866                                    | 6%    | 17,770                                      | 11%   | 5,109                                  | 7%    |
| Other                                                            | 542,562     | 11%   | 430,377                                     | 14%   | 94,575                                    | 7%    | 13,410                                      | 8%    | 4,200                                  | 6%    |
| Body-mass index, kg/m <sup>2</sup>                               | 30.2        | ±6.09 | 29.8                                        | ±6.04 | 30.8                                      | ±6.06 | 30.9                                        | ±6.35 | 31.9                                   | ±6.26 |
| Body-mass index category, kg/m <sup>2</sup>                      |             |       |                                             |       |                                           |       |                                             |       |                                        |       |
| <18.5                                                            | 28,116      | 1%    | 20,717                                      | 1%    | 6,230                                     | 1%    | 951                                         | 1%    | 218                                    | 0%    |
| 18.5-24.9                                                        | 553,988     | 17%   | 379,204                                     | 20%   | 152,657                                   | 14%   | 16,249                                      | 15%   | 5,878                                  | 11%   |
| 25-29.9                                                          | 1,107,238   | 35%   | 687,781                                     | 36%   | 367,799                                   | 34%   | 34,949                                      | 32%   | 16,709                                 | 30%   |
| 30-34.9                                                          | 869,628     | 27%   | 507,893                                     | 26%   | 313,277                                   | 29%   | 30,944                                      | 29%   | 17,514                                 | 32%   |
| 35-39.9                                                          | 399,754     | 13%   | 224,651                                     | 12%   | 149,833                                   | 14%   | 15,734                                      | 15%   | 9,536                                  | 17%   |
| ≥ 40                                                             | 208,950     | 7%    | 113,491                                     | 6%    | 80,708                                    | 8%    | 9,077                                       | 8%    | 5,674                                  | 10%   |
| Tobacco use                                                      |             |       |                                             |       |                                           |       |                                             |       |                                        |       |
| Never                                                            | 1,747,387   | 36%   | 1,338,452                                   | 42%   | 328,440                                   | 24%   | 62,782                                      | 39%   | 17,713                                 | 26%   |
| Former                                                           | 1,729,275   | 36%   | 984,318                                     | 31%   | 651,438                                   | 47%   | 58,321                                      | 36%   | 35,198                                 | 51%   |
| Current                                                          | 1,323,044   | 28%   | 857,133                                     | 27%   | 408,908                                   | 29%   | 40,651                                      | 25%   | 16,352                                 | 24%   |
| Urban/rural/highly rural ZIP code                                |             |       |                                             |       |                                           |       |                                             |       |                                        |       |
| Highly rural                                                     | 57,047      | 1%    | 34,211                                      | 1%    | 20,620                                    | 1%    | 1,360                                       | 1%    | 856                                    | 1%    |
| Rural                                                            | 1,561,076   | 33%   | 975,607                                     | 31%   | 518,394                                   | 37%   | 43,690                                      | 27%   | 23,385                                 | 34%   |
| Urban                                                            | 3,172,176   | 66%   | 2,163,063                                   | 68%   | 847,474                                   | 61%   | 116,643                                     | 72%   | 44,996                                 | 65%   |
| Unknown                                                          | 9,407       | 0%    | 7,022                                       | 0%    | 2,298                                     | 0%    | 61                                          | 0%    | 26                                     | 0%    |
| Estimated glomerular filtration rate, ml/min/1.73 m <sup>2</sup> |             |       |                                             |       |                                           |       |                                             |       |                                        |       |
| ≥ 90                                                             | 938,310     | 27%   | 654,399                                     | 31%   | 235,893                                   | 20%   | 36,230                                      | 32%   | 11,788                                 | 19%   |
| 60-89                                                            | 1,718,393   | 49%   | 1,034,287                                   | 49%   | 599,357                                   | 50%   | 54,598                                      | 48%   | 30,151                                 | 48%   |
| 45-59                                                            | 520,635     | 15%   | 268,392                                     | 13%   | 226,556                                   | 19%   | 13,799                                      | 12%   | 11,888                                 | 19%   |
| 30-44                                                            | 212,116     | 6%    | 100,776                                     | 5%    | 100,175                                   | 8%    | 5,626                                       | 5%    | 5,539                                  | 9%    |
| 15-29                                                            | 58,464      | 2%    | 27,223                                      | 1%    | 27,527                                    | 2%    | 1,906                                       | 2%    | 1,808                                  | 3%    |
| <15 or dialysis                                                  | 25,765      | 1%    | 12,803                                      | 1%    | 10,449                                    | 1%    | 1,503                                       | 1%    | 1,010                                  | 2%    |
| Active statin prescription six months prior to enrollment        | 1,375,009   | 29%   | 259,070                                     | 8%    | 1,046,850                                 | 75%   | 17,020                                      | 11%   | 52,069                                 | 75%   |

**Table 1 CONTINUED.** Characteristics of VHA Veterans with and without a positive respiratory swab for SARS-CoV-2 (March 1, 2020–March 10, 2021), stratified by presence of an active statin prescription at enrollment

|                                                     |           |       |           |       |           |       |         |       |        |       |
|-----------------------------------------------------|-----------|-------|-----------|-------|-----------|-------|---------|-------|--------|-------|
| Diabetes                                            | 1,482,197 | 31%   | 679,909   | 21%   | 716,920   | 52%   | 44,364  | 27%   | 41,004 | 59%   |
| Hypertension                                        | 2,874,378 | 60%   | 1,551,529 | 49%   | 1,176,398 | 85%   | 86,382  | 53%   | 60,069 | 87%   |
| Cardiovascular disease                              | 1,749,197 | 36%   | 857,912   | 27%   | 794,940   | 57%   | 53,635  | 33%   | 42,710 | 62%   |
| Heart failure                                       | 352,710   | 7%    | 144,971   | 5%    | 183,128   | 13%   | 12,388  | 8%    | 12,223 | 18%   |
| Alcohol use disorder                                | 909,010   | 19%   | 629,005   | 20%   | 238,333   | 17%   | 31,212  | 19%   | 10,460 | 15%   |
| Statin prescribed                                   |           |       |           |       |           |       |         |       |        |       |
| None                                                | 3,341,657 | 70%   | 3,179,903 | 100%  | 0         | 0%    | 161,754 | 100%  | 0      | 0%    |
| Atorvastatin                                        | 872,981   | 18%   |           |       | 829,795   | 60%   |         |       | 43,186 | 62%   |
| Fluvastatin                                         | 364       | <1%   |           |       | 348       | 0%    |         |       | 16     | 0%    |
| Lovastatin                                          | 15,375    | <1%   |           |       | 14,751    | 1%    |         |       | 624    | 1%    |
| Pitavastatin                                        | 801       | <1%   |           |       | 748       | <1%   |         |       | 53     | <1%   |
| Pravastatin                                         | 123,779   | 3%    |           |       | 118,039   | 8%    |         |       | 5,740  | 8%    |
| Rosuvastatin                                        | 173,943   | 4%    |           |       | 165,066   | 12%   |         |       | 8,877  | 13%   |
| Simvastatin                                         | 270,806   | 6%    |           |       | 260,039   | 19%   |         |       | 10,767 | 16%   |
| High-potency statin (vs. low- or moderate-potency)* | 616,824   | 42%   | 0         | <1%   | 585,224   | 42%   | 0       | <1%   | 31,600 | 46%   |
| Mean hsCRP in the prior six months, mg/L**          | 17.3      | ±136  | 16.4      | ±151  | 18.2      | ±120  | 19.9    | ±49.6 | 21.0   | ±52.9 |
| hsCRP in the prior six months ≥2 mg/L**             | 390,796   | 41%   | 217,408   | 40%   | 145,787   | 42%   | 17,407  | 44%   | 10,194 | 45%   |
| Mean hsCRP at or after the index date, mg/L***      | 29.3      | ±54.1 | 22.2      | ±46.6 | 25.6      | ±50.8 | 57.8    | ±70.8 | 65.2   | ±71.1 |
| hsCRP at or after the index date ≤2 mg/L***         | 125,178   | 52%   | 61,501    | 46%   | 34,630    | 49%   | 18,260  | 75%   | 10,787 | 79%   |
| <b>OUTCOMES</b>                                     |           |       |           |       |           |       |         |       |        |       |
| Hospital admission within 30 days                   | 124,094   | 3%    | 61,651    | 2%    | 29,953    | 2%    | 20,280  | 13%   | 12,210 | 18%   |
| ICU admission within 30 days                        | 15,438    | <1%   | 5,710     | <1%   | 3,588     | <1%   | 3,754   | 2%    | 2,386  | 3%    |
| Death w/in 30 days                                  | 31,409    | 1%    | 13,074    | <1%   | 6,224     | <1%   | 7,815   | 5%    | 4,296  | 6%    |

Data are presented as mean ± standard deviation (SD) for continuous variables and n (%) for categorical variables

p-values for global differences in participant characteristics across categories of COVID diagnosis and prior statin use all <0.001

\* based on estimated % LDL-c reduction

\*\* up to 14 days prior to index date (Overall n=958,343)

\*\*\* Overall n=224,930

**Table 2a.** Odds ratios from logistic regression models testing the association of active statin prescription at enrollment with adverse 30-day outcomes among VHA Veterans with and without a positive respiratory swab for SARS-CoV-2, including adjustment for prior statin use

|                                                                  | No positive swab, n=4,568,689 |       |        |               |       |        |       |       |        | ≥1 positive swab, n=231,017 |       |        |               |       |        |       |       |         |
|------------------------------------------------------------------|-------------------------------|-------|--------|---------------|-------|--------|-------|-------|--------|-----------------------------|-------|--------|---------------|-------|--------|-------|-------|---------|
|                                                                  | Hospital admission            |       |        | ICU admission |       |        | Death |       |        | Hospital admission          |       |        | ICU admission |       |        | Death |       |         |
|                                                                  | OR                            | 95%CI |        | OR            | 95%CI |        | OR    | 95%CI |        | OR                          | 95%CI |        | OR            | 95%CI |        | OR    | 95%CI |         |
| Active statin prescription at enrollment                         | 0.79                          | 0.77  | — 0.80 | 0.98          | 0.95  | — 1.01 | 0.86  | 0.81  | — 0.90 | 0.94                        | 0.88  | — 1.01 | 0.60          | 0.58  | — 0.62 | 0.81  | 0.77  | — 0.85  |
| Statin prescription six months prior to enrollment               | 0.91                          | 0.89  | — 0.93 | 0.93          | 0.90  | — 0.96 | 0.88  | 0.83  | — 0.93 | 0.97                        | 0.91  | — 1.04 | 0.93          | 0.90  | — 0.97 | 0.94  | 0.89  | — 0.99  |
| Sex at birth, female                                             | 0.73                          | 0.71  | — 0.75 | 0.75          | 0.71  | — 0.79 | 0.73  | 0.67  | — 0.80 | 0.74                        | 0.65  | — 0.84 | 0.63          | 0.58  | — 0.69 | 0.56  | 0.50  | — 0.64  |
| Age category, years                                              |                               |       |        |               |       |        |       |       |        |                             |       |        |               |       |        |       |       |         |
| 19-39                                                            | 1.16                          | 1.12  | — 1.19 | 0.61          | 0.57  | — 0.65 | 0.61  | 0.54  | — 0.69 | 0.60                        | 0.51  | — 0.71 | 0.26          | 0.22  | — 0.30 | 0.15  | 0.11  | — 0.21  |
| 40-49                                                            | 0.97                          | 0.94  | — 1.01 | 0.75          | 0.70  | — 0.80 | 0.81  | 0.73  | — 0.91 | 0.68                        | 0.59  | — 0.79 | 0.46          | 0.40  | — 0.54 | 0.38  | 0.30  | — 0.48  |
| 50-59                                                            | ref                           | ref   | ref    | ref           | ref   | ref    | ref   | ref   | ref    | ref                         | ref   | ref    | ref           | ref   | ref    | ref   | ref   | ref     |
| 60-69                                                            | 1.01                          | 0.99  | — 1.03 | 1.29          | 1.23  | — 1.34 | 1.16  | 1.08  | — 1.25 | 1.32                        | 1.21  | — 1.46 | 1.95          | 1.81  | — 2.10 | 2.86  | 2.55  | — 3.20  |
| 70-79                                                            | 0.81                          | 0.79  | — 0.83 | 1.43          | 1.37  | — 1.49 | 1.00  | 0.92  | — 1.08 | 1.49                        | 1.36  | — 1.64 | 2.60          | 2.41  | — 2.79 | 5.93  | 5.32  | — 6.61  |
| ≥80                                                              | 0.96                          | 0.93  | — 0.99 | 1.81          | 1.71  | — 1.91 | 0.95  | 0.87  | — 1.04 | 1.62                        | 1.45  | — 1.82 | 5.06          | 4.68  | — 5.46 | 13.86 | 12.37 | — 15.53 |
| White (vs not white)                                             | 1.21                          | 1.14  | — 1.28 | 0.88          | 0.81  | — 0.97 | 1.23  | 1.02  | — 1.49 | 0.74                        | 0.61  | — 0.91 | 1.10          | 0.95  | — 1.27 | 0.87  | 0.74  | — 1.04  |
| Black vs( not Black)                                             | 1.49                          | 1.40  | — 1.58 | 1.36          | 1.24  | — 1.50 | 1.53  | 1.26  | — 1.85 | 1.10                        | 0.89  | — 1.35 | 1.05          | 0.90  | — 1.22 | 0.78  | 0.66  | — 0.94  |
| Hispanic (vs not Hispanic)                                       | 1.07                          | 1.04  | — 1.10 | 1.16          | 1.10  | — 1.22 | 1.23  | 1.13  | — 1.35 | 1.03                        | 0.92  | — 1.15 | 1.07          | 0.99  | — 1.14 | 1.13  | 1.04  | — 1.24  |
| Body-mass index category, kg/m <sup>2</sup>                      |                               |       |        |               |       |        |       |       |        |                             |       |        |               |       |        |       |       |         |
| <18.5                                                            | 1.35                          | 1.29  | — 1.42 | 1.14          | 1.01  | — 1.29 | 1.51  | 1.31  | — 1.73 | 1.35                        | 1.06  | — 1.72 | 2.48          | 2.33  | — 2.65 | 1.81  | 1.59  | — 2.07  |
| 18.5-24.9                                                        | ref                           | ref   | ref    | ref           | ref   | ref    | ref   | ref   | ref    | ref                         | ref   | ref    | ref           | ref   | ref    | ref   | ref   | ref     |
| 25-29.9                                                          | 0.75                          | 0.73  | — 0.76 | 0.81          | 0.78  | — 0.85 | 0.70  | 0.65  | — 0.74 | 0.89                        | 0.82  | — 0.97 | 0.54          | 0.52  | — 0.56 | 0.73  | 0.68  | — 0.79  |
| 30-34.9                                                          | 0.67                          | 0.65  | — 0.68 | 0.76          | 0.73  | — 0.80 | 0.62  | 0.57  | — 0.66 | 0.88                        | 0.81  | — 0.96 | 0.42          | 0.40  | — 0.44 | 0.69  | 0.64  | — 0.74  |
| 35-39.9                                                          | 0.63                          | 0.61  | — 0.65 | 0.76          | 0.72  | — 0.80 | 0.57  | 0.52  | — 0.62 | 0.85                        | 0.76  | — 0.94 | 0.37          | 0.35  | — 0.40 | 0.64  | 0.59  | — 0.70  |
| ≥40                                                              | 0.65                          | 0.63  | — 0.67 | 0.87          | 0.82  | — 0.93 | 0.59  | 0.53  | — 0.65 | 1.03                        | 0.91  | — 1.16 | 0.43          | 0.39  | — 0.46 | 0.80  | 0.72  | — 0.88  |
| Tobacco use                                                      |                               |       |        |               |       |        |       |       |        |                             |       |        |               |       |        |       |       |         |
| Never                                                            | ref                           | ref   | ref    | ref           | ref   | ref    | ref   | ref   | ref    | ref                         | ref   | ref    | ref           | ref   | ref    | ref   | ref   | ref     |
| Former                                                           | 1.25                          | 1.23  | — 1.28 | 1.11          | 1.08  | — 1.15 | 1.12  | 1.06  | — 1.19 | 1.10                        | 1.02  | — 1.17 | 1.09          | 1.04  | — 1.13 | 1.18  | 1.12  | — 1.24  |
| Current                                                          | 2.02                          | 1.98  | — 2.06 | 1.39          | 1.35  | — 1.44 | 1.76  | 1.66  | — 1.87 | 1.29                        | 1.20  | — 1.39 | 1.67          | 1.60  | — 1.74 | 1.24  | 1.17  | — 1.32  |
| Urban/rural/highly rural residence                               |                               |       |        |               |       |        |       |       |        |                             |       |        |               |       |        |       |       |         |
| Highly rural                                                     | 0.68                          | 0.64  | — 0.73 | 0.58          | 0.50  | — 0.66 | 0.98  | 0.82  | — 1.18 | 0.74                        | 0.54  | — 1.00 | 0.92          | 0.81  | — 1.05 | 1.16  | 0.98  | — 1.38  |
| Rural                                                            | 0.74                          | 0.73  | — 0.75 | 0.70          | 0.68  | — 0.72 | 0.74  | 0.70  | — 0.78 | 0.88                        | 0.82  | — 0.93 | 0.89          | 0.87  | — 0.92 | 1.03  | 0.99  | — 1.08  |
| Urban                                                            | ref                           | ref   | ref    | ref           | ref   | ref    | ref   | ref   | ref    | ref                         | ref   | ref    | ref           | ref   | ref    | ref   | ref   | ref     |
| Unknown                                                          | 0.25                          | 0.18  | — 0.35 | 0.27          | 0.10  | — 0.75 | 0.35  | 0.13  | — 0.94 | 0.55                        | 0.08  | — 3.99 | 0.80          | 0.51  | — 1.25 | 1.77  | 0.73  | — 4.30  |
| Diabetes                                                         | 1.18                          | 1.16  | — 1.20 | 1.30          | 1.27  | — 1.34 | 1.26  | 1.21  | — 1.32 | 1.26                        | 1.19  | — 1.34 | 1.41          | 1.36  | — 1.45 | 1.37  | 1.31  | — 1.43  |
| Hypertension                                                     | 1.22                          | 1.19  | — 1.24 | 1.30          | 1.25  | — 1.35 | 1.30  | 1.22  | — 1.39 | 1.29                        | 1.19  | — 1.41 | 1.09          | 1.04  | — 1.14 | 0.96  | 0.90  | — 1.02  |
| Cardiovascular disease                                           | 2.04                          | 2.01  | — 2.08 | 1.84          | 1.79  | — 1.90 | 2.69  | 2.55  | — 2.84 | 2.08                        | 1.95  | — 2.23 | 1.88          | 1.81  | — 1.95 | 1.24  | 1.18  | — 1.30  |
| Heart failure                                                    | 2.13                          | 2.09  | — 2.16 | 1.64          | 1.59  | — 1.70 | 2.34  | 2.22  | — 2.46 | 1.53                        | 1.43  | — 1.63 | 2.51          | 2.42  | — 2.59 | 1.31  | 1.25  | — 1.38  |
| Alcohol use disorder                                             | 1.12                          | 1.10  | — 1.14 | 0.75          | 0.72  | — 0.78 | 1.03  | 0.97  | — 1.09 | 0.86                        | 0.79  | — 0.93 | 0.78          | 0.75  | — 0.82 | 0.68  | 0.64  | — 0.73  |
| Estimated glomerular filtration rate, ml/min/1.73 m <sup>2</sup> |                               |       |        |               |       |        |       |       |        |                             |       |        |               |       |        |       |       |         |
| ≥ 90                                                             | ref                           | ref   | ref    | ref           | ref   | ref    | ref   | ref   | ref    | ref                         | ref   | ref    | ref           | ref   | ref    | ref   | ref   | ref     |
| 60-89                                                            | 0.80                          | 0.79  | — 0.82 | 0.90          | 0.87  | — 0.93 | 0.80  | 0.76  | — 0.85 | 0.96                        | 0.88  | — 1.04 | 0.60          | 0.57  | — 0.62 | 1.10  | 1.02  | — 1.18  |
| 45-59                                                            | 0.84                          | 0.81  | — 0.86 | 0.99          | 0.94  | — 1.03 | 0.84  | 0.78  | — 0.91 | 1.00                        | 0.91  | — 1.10 | 0.71          | 0.67  | — 0.74 | 1.44  | 1.33  | — 1.56  |
| 30-44                                                            | 0.93                          | 0.90  | — 0.96 | 1.10          | 1.04  | — 1.16 | 0.92  | 0.84  | — 1.01 | 1.14                        | 1.02  | — 1.29 | 0.99          | 0.93  | — 1.05 | 1.83  | 1.68  | — 1.99  |
| 15-29                                                            | 1.15                          | 1.10  | — 1.20 | 1.31          | 1.21  | — 1.42 | 1.14  | 1.01  | — 1.29 | 1.32                        | 1.14  | — 1.53 | 2.07          | 1.94  | — 2.21 | 2.65  | 2.36  | — 2.97  |
| <15 or dialysis                                                  | 1.60                          | 1.52  | — 1.69 | 1.46          | 1.33  | — 1.60 | 1.77  | 1.56  | — 2.00 | 1.51                        | 1.29  | — 1.77 | 3.07          | 2.85  | — 3.32 | 2.48  | 2.16  | — 2.85  |

Models additionally adjusted for month of diagnosis and geographic location by Veterans Integrated Service Network location

For peer review only - <http://bmjopen.bmj.com/site/about/guidelines.xhtml>

Table 2b. Odds ratios from logistic regression models testing the association of active statin prescription at enrollment with adverse 30-day outcomes among VHA Veterans with and without a positive respiratory swab for SARS-CoV-2, without adjustment for prior statin use

|                                                                  | No positive swab, n=4,568,689 |       |        |               |       |        |       |       |        | ≥1 positive swab, n=231,017 |       |        |               |       |        |       |       |         |
|------------------------------------------------------------------|-------------------------------|-------|--------|---------------|-------|--------|-------|-------|--------|-----------------------------|-------|--------|---------------|-------|--------|-------|-------|---------|
|                                                                  | Hospital admission            |       |        | ICU admission |       |        | Death |       |        | Hospital admission          |       |        | ICU admission |       |        | Death |       |         |
|                                                                  | OR                            | 95%CI |        | OR            | 95%CI |        | OR    | 95%CI |        | OR                          | 95%CI |        | OR            | 95%CI |        | OR    | 95%CI |         |
| Active statin prescription at enrollment                         | 0.75                          | 0.74  | — 0.76 | 0.80          | 0.76  | — 0.83 | 0.58  | 0.56  | — 0.59 | 0.94                        | 0.91  | — 0.96 | 0.93          | 0.88  | — 0.98 | 0.78  | 0.75  | — 0.82  |
| Sex at birth, female                                             | 0.73                          | 0.71  | — 0.75 | 0.73          | 0.67  | — 0.81 | 0.63  | 0.58  | — 0.69 | 0.75                        | 0.71  | — 0.79 | 0.74          | 0.65  | — 0.84 | 0.57  | 0.50  | — 0.65  |
| Age category, years                                              |                               |       |        |               |       |        |       |       |        |                             |       |        |               |       |        |       |       |         |
| 19-39                                                            | 1.16                          | 1.13  | — 1.20 | 0.61          | 0.54  | — 0.69 | 0.26  | 0.22  | — 0.30 | 0.61                        | 0.58  | — 0.66 | 0.60          | 0.51  | — 0.71 | 0.15  | 0.11  | — 0.21  |
| 40-49                                                            | 0.98                          | 0.95  | — 1.01 | 0.82          | 0.73  | — 0.92 | 0.47  | 0.40  | — 0.54 | 0.75                        | 0.71  | — 0.80 | 0.68          | 0.59  | — 0.79 | 0.38  | 0.30  | — 0.48  |
| 50-59                                                            | ref                           | ref   | ref    | ref           | ref   | ref    | ref   | ref   | ref    | ref                         | ref   | ref    | ref           | ref   | ref    | ref   | ref   | ref     |
| 60-69                                                            | 1.01                          | 0.98  | — 1.03 | 1.16          | 1.08  | — 1.25 | 1.95  | 1.81  | — 2.10 | 1.28                        | 1.23  | — 1.34 | 1.32          | 1.21  | — 1.45 | 2.86  | 2.55  | — 3.20  |
| 70-79                                                            | 0.81                          | 0.79  | — 0.83 | 0.99          | 0.92  | — 1.07 | 2.59  | 2.41  | — 2.78 | 1.43                        | 1.36  | — 1.49 | 1.49          | 1.36  | — 1.64 | 5.92  | 5.31  | — 6.60  |
| ≥80                                                              | 0.96                          | 0.93  | — 0.99 | 0.95          | 0.87  | — 1.04 | 5.06  | 4.68  | — 5.46 | 1.81                        | 1.71  | — 1.91 | 1.62          | 1.45  | — 1.82 | 13.86 | 12.37 | — 15.53 |
| White (vs not white)                                             | 1.20                          | 1.14  | — 1.28 | 1.23          | 1.02  | — 1.49 | 1.10  | 0.95  | — 1.27 | 0.88                        | 0.81  | — 0.97 | 0.75          | 0.61  | — 0.91 | 0.87  | 0.74  | — 1.04  |
| Black vs (not Black)                                             | 1.49                          | 1.40  | — 1.58 | 1.53          | 1.26  | — 1.86 | 1.05  | 0.90  | — 1.22 | 1.37                        | 1.24  | — 1.50 | 1.10          | 0.89  | — 1.35 | 0.78  | 0.66  | — 0.94  |
| Hispanic (vs not Hispanic)                                       | 1.07                          | 1.04  | — 1.10 | 1.23          | 1.13  | — 1.35 | 1.06  | 0.99  | — 1.14 | 1.16                        | 1.10  | — 1.22 | 1.03          | 0.92  | — 1.15 | 1.13  | 1.04  | — 1.24  |
| Body-mass index category, kg/m <sup>2</sup>                      |                               |       |        |               |       |        |       |       |        |                             |       |        |               |       |        |       |       |         |
| <18.5                                                            | 1.35                          | 1.29  | — 1.42 | 1.51          | 1.32  | — 1.74 | 2.49  | 2.33  | — 2.65 | 1.14                        | 1.02  | — 1.29 | 1.35          | 1.06  | — 1.72 | 1.82  | 1.59  | — 2.07  |
| 18.5-24.9                                                        | ref                           | ref   | ref    | ref           | ref   | ref    | ref   | ref   | ref    | ref                         | ref   | ref    | ref           | ref   | ref    | ref   | ref   | ref     |
| 25-29.9                                                          | 0.75                          | 0.73  | — 0.76 | 0.70          | 0.65  | — 0.74 | 0.54  | 0.52  | — 0.56 | 0.81                        | 0.78  | — 0.85 | 0.89          | 0.82  | — 0.97 | 0.73  | 0.68  | — 0.79  |
| 30-34.9                                                          | 0.67                          | 0.65  | — 0.68 | 0.61          | 0.57  | — 0.66 | 0.42  | 0.40  | — 0.44 | 0.76                        | 0.73  | — 0.80 | 0.88          | 0.81  | — 0.96 | 0.68  | 0.64  | — 0.74  |
| 35-39.9                                                          | 0.63                          | 0.61  | — 0.64 | 0.57          | 0.52  | — 0.62 | 0.37  | 0.35  | — 0.40 | 0.76                        | 0.72  | — 0.80 | 0.85          | 0.76  | — 0.94 | 0.64  | 0.59  | — 0.70  |
| ≥40                                                              | 0.65                          | 0.63  | — 0.67 | 0.58          | 0.53  | — 0.65 | 0.43  | 0.39  | — 0.46 | 0.87                        | 0.81  | — 0.92 | 1.03          | 0.91  | — 1.16 | 0.79  | 0.72  | — 0.88  |
| Tobacco use                                                      |                               |       |        |               |       |        |       |       |        |                             |       |        |               |       |        |       |       |         |
| Never                                                            | ref                           | ref   | ref    | ref           | ref   | ref    | ref   | ref   | ref    | ref                         | ref   | ref    | ref           | ref   | ref    | ref   | ref   | ref     |
| Former                                                           | 1.25                          | 1.22  | — 1.27 | 1.12          | 1.05  | — 1.19 | 1.09  | 1.04  | — 1.13 | 1.11                        | 1.08  | — 1.15 | 1.10          | 1.02  | — 1.17 | 1.18  | 1.12  | — 1.24  |
| Current                                                          | 2.02                          | 1.98  | — 2.05 | 1.76          | 1.66  | — 1.87 | 1.66  | 1.60  | — 1.74 | 1.39                        | 1.35  | — 1.44 | 1.29          | 1.20  | — 1.39 | 1.24  | 1.17  | — 1.32  |
| Urban/rural/highly rural residence                               |                               |       |        |               |       |        |       |       |        |                             |       |        |               |       |        |       |       |         |
| Highly rural                                                     | 0.68                          | 0.64  | — 0.73 | 0.98          | 0.82  | — 1.18 | 0.92  | 0.81  | — 1.05 | 0.57                        | 0.50  | — 0.66 | 0.74          | 0.54  | — 1.00 | 1.16  | 0.98  | — 1.38  |
| Rural                                                            | 0.74                          | 0.73  | — 0.75 | 0.74          | 0.70  | — 0.78 | 0.89  | 0.86  | — 0.92 | 0.70                        | 0.68  | — 0.72 | 0.87          | 0.82  | — 0.93 | 1.03  | 0.99  | — 1.08  |
| Urban                                                            | ref                           | ref   | ref    | ref           | ref   | ref    | ref   | ref   | ref    | ref                         | ref   | ref    | ref           | ref   | ref    | ref   | ref   | ref     |
| Unknown                                                          | 0.25                          | 0.18  | — 0.35 | 0.35          | 0.13  | — 0.94 | 0.80  | 0.51  | — 1.25 | 0.27                        | 0.10  | — 0.74 | 0.55          | 0.08  | — 3.98 | 1.75  | 0.72  | — 4.27  |
| Diabetes                                                         | 1.17                          | 1.15  | — 1.19 | 1.25          | 1.20  | — 1.31 | 1.40  | 1.36  | — 1.45 | 1.30                        | 1.26  | — 1.33 | 1.26          | 1.19  | — 1.33 | 1.36  | 1.30  | — 1.42  |
| Hypertension                                                     | 1.21                          | 1.19  | — 1.24 | 1.29          | 1.21  | — 1.38 | 1.09  | 1.04  | — 1.13 | 1.30                        | 1.25  | — 1.35 | 1.29          | 1.18  | — 1.41 | 0.96  | 0.90  | — 1.02  |
| Cardiovascular disease                                           | 2.03                          | 2.00  | — 2.07 | 2.67          | 2.53  | — 2.82 | 1.87  | 1.80  | — 1.94 | 1.84                        | 1.78  | — 1.89 | 2.08          | 1.94  | — 2.23 | 1.24  | 1.18  | — 1.30  |
| Heart failure                                                    | 2.12                          | 2.08  | — 2.16 | 2.33          | 2.21  | — 2.45 | 2.50  | 2.41  | — 2.59 | 1.64                        | 1.59  | — 1.70 | 1.53          | 1.43  | — 1.63 | 1.31  | 1.25  | — 1.38  |
| Alcohol use disorder                                             | 1.12                          | 1.10  | — 1.14 | 1.03          | 0.97  | — 1.09 | 0.78  | 0.75  | — 0.82 | 0.75                        | 0.73  | — 0.78 | 0.86          | 0.79  | — 0.93 | 0.68  | 0.64  | — 0.73  |
| Estimated glomerular filtration rate, ml/min/1.73 m <sup>2</sup> |                               |       |        |               |       |        |       |       |        |                             |       |        |               |       |        |       |       |         |
| ≥ 90                                                             | ref                           | ref   | ref    | ref           | ref   | ref    | ref   | ref   | ref    | ref                         | ref   | ref    | ref           | ref   | ref    | ref   | ref   | ref     |
| 60-89                                                            | 0.80                          | 0.79  | — 0.82 | 0.80          | 0.75  | — 0.85 | 0.60  | 0.57  | — 0.62 | 0.90                        | 0.86  | — 0.93 | 0.96          | 0.88  | — 1.04 | 1.09  | 1.02  | — 1.18  |
| 45-59                                                            | 0.84                          | 0.81  | — 0.86 | 0.84          | 0.78  | — 0.91 | 0.71  | 0.67  | — 0.74 | 0.98                        | 0.94  | — 1.03 | 1.00          | 0.91  | — 1.09 | 1.44  | 1.33  | — 1.56  |
| 30-44                                                            | 0.93                          | 0.90  | — 0.96 | 0.92          | 0.84  | — 1.01 | 0.99  | 0.93  | — 1.05 | 1.10                        | 1.04  | — 1.16 | 1.14          | 1.02  | — 1.29 | 1.83  | 1.68  | — 1.99  |
| 15-29                                                            | 1.14                          | 1.09  | — 1.20 | 1.14          | 1.01  | — 1.29 | 2.07  | 1.94  | — 2.21 | 1.31                        | 1.21  | — 1.42 | 1.32          | 1.14  | — 1.53 | 2.65  | 2.36  | — 2.97  |
| <15 or dialysis                                                  | 1.60                          | 1.52  | — 1.69 | 1.77          | 1.56  | — 2.01 | 3.08  | 2.85  | — 3.32 | 1.46                        | 1.33  | — 1.60 | 1.51          | 1.29  | — 1.77 | 2.48  | 2.16  | — 2.85  |

Models additionally adjusted for month of diagnosis and geographic location by Veterans Integrated Service Network location

**Table 3.** Odds ratios from logistic regression models testing the association of specific statins compared to no statin with adverse 30-day outcomes among VHA Veterans with a positive respiratory swab for SARS-CoV-2, n=231,017

|                                             | Hospital admission |        |   |      |         | ICU admission |        |   |       |         | Death |        |   |       |         |
|---------------------------------------------|--------------------|--------|---|------|---------|---------------|--------|---|-------|---------|-------|--------|---|-------|---------|
|                                             | OR                 | 95% CI |   |      | p value | OR            | 95% CI |   |       | p value | OR    | 95% CI |   |       | p value |
| No statin                                   | ref                |        |   |      |         | ref           |        |   |       |         | ref   |        |   |       |         |
| Atorvastatin                                | 0.98               | 0.95   | — | 1.01 | 0.136   | 0.96          | 0.90   | — | 1.02  | 0.194   | 0.80  | 0.76   | — | 0.84  | <0.001  |
| Fluvastatin                                 | 1.47               | 0.45   | — | 4.82 | 0.524   | 1.79          | 0.23   | — | 13.80 | 0.577   | 0.55  | 0.07   | — | 4.43  | 0.575   |
| Lovastatin                                  | 0.73               | 0.57   | — | 0.93 | 0.012   | 0.48          | 0.26   | — | 0.90  | 0.022   | 0.64  | 0.45   | — | 0.91  | 0.013   |
| Pitavastatin                                | 0.45               | 0.16   | — | 1.26 | 0.128   | 0.66          | 0.09   | — | 4.80  | 0.679   | 0.82  | 0.25   | — | 2.68  | 0.738   |
| Pravastatin                                 | 0.93               | 0.86   | — | 1.00 | 0.045   | 0.94          | 0.81   | — | 1.10  | 0.443   | 0.78  | 0.70   | — | 0.87  | <0.001  |
| Rosuvastatin                                | 0.81               | 0.76   | — | 0.86 | <0.001  | 0.82          | 0.72   | — | 0.93  | 0.002   | 0.72  | 0.65   | — | 0.79  | <0.001  |
| Simvastatin                                 | 0.91               | 0.86   | — | 0.97 | 0.001   | 0.91          | 0.80   | — | 1.02  | 0.107   | 0.77  | 0.71   | — | 0.84  | <0.001  |
| Sex at birth, female                        | 0.75               | 0.71   | — | 0.80 | <0.001  | 0.74          | 0.65   | — | 0.84  | <0.001  | 0.57  | 0.50   | — | 0.65  | <0.001  |
| Age category, years                         |                    |        |   |      |         |               |        |   |       |         |       |        |   |       |         |
| 19-39                                       | 0.61               | 0.58   | — | 0.66 | <0.001  | 0.60          | 0.51   | — | 0.71  | <0.001  | 0.15  | 0.11   | — | 0.21  | <0.001  |
| 40-49                                       | 0.75               | 0.71   | — | 0.80 | <0.001  | 0.68          | 0.59   | — | 0.79  | <0.001  | 0.38  | 0.30   | — | 0.48  | <0.001  |
| 50-59                                       | ref                |        |   |      |         | ref           |        |   |       |         | ref   |        |   |       |         |
| 60-69                                       | 1.28               | 1.23   | — | 1.34 | <0.001  | 1.32          | 1.21   | — | 1.45  | <0.001  | 2.85  | 2.55   | — | 3.20  | <0.001  |
| 70-79                                       | 1.43               | 1.36   | — | 1.49 | <0.001  | 1.49          | 1.36   | — | 1.64  | <0.001  | 5.92  | 5.31   | — | 6.60  | <0.001  |
| ≥80                                         | 1.81               | 1.71   | — | 1.91 | <0.001  | 1.62          | 1.45   | — | 1.82  | <0.001  | 13.86 | 12.37  | — | 15.54 | <0.001  |
| White (vs. not white)                       | 0.88               | 0.81   | — | 0.97 | 0.007   | 0.75          | 0.61   | — | 0.91  | 0.004   | 0.88  | 0.74   | — | 1.04  | 0.121   |
| Black (vs. not Black)                       | 1.36               | 1.24   | — | 1.50 | <0.001  | 1.10          | 0.89   | — | 1.35  | 0.390   | 0.78  | 0.66   | — | 0.94  | 0.007   |
| Hispanic (vs. not Hispanic)                 | 1.16               | 1.10   | — | 1.22 | <0.001  | 1.03          | 0.92   | — | 1.15  | 0.633   | 1.13  | 1.04   | — | 1.24  | 0.007   |
| Body-mass index category, kg/m <sup>2</sup> |                    |        |   |      |         |               |        |   |       |         |       |        |   |       |         |
| <18.5                                       | 1.15               | 1.02   | — | 1.29 | 0.025   | 1.35          | 1.06   | — | 1.73  | 0.015   | 1.82  | 1.59   | — | 2.08  | <0.001  |
| 18.5-24.9                                   | ref                |        |   |      |         | ref           |        |   |       |         | ref   |        |   |       |         |
| 25-29.9                                     | 0.81               | 0.78   | — | 0.85 | <0.001  | 0.89          | 0.82   | — | 0.97  | 0.006   | 0.73  | 0.68   | — | 0.79  | <0.001  |
| 30-34.9                                     | 0.76               | 0.73   | — | 0.80 | <0.001  | 0.88          | 0.81   | — | 0.97  | 0.006   | 0.68  | 0.64   | — | 0.74  | <0.001  |
| 35-39.9                                     | 0.76               | 0.72   | — | 0.80 | <0.001  | 0.85          | 0.76   | — | 0.94  | 0.002   | 0.64  | 0.59   | — | 0.70  | <0.001  |
| ≥40                                         | 0.87               | 0.81   | — | 0.92 | <0.001  | 1.03          | 0.91   | — | 1.16  | 0.675   | 0.79  | 0.72   | — | 0.88  | <0.001  |
| Tobacco use                                 |                    |        |   |      |         |               |        |   |       |         |       |        |   |       |         |
| Never                                       | ref                |        |   |      |         |               |        |   |       |         |       |        |   |       |         |
| Former                                      | 1.11               | 1.08   | — | 1.15 | <0.001  | 1.10          | 1.02   | — | 1.17  | 0.010   | 1.18  | 1.12   | — | 1.24  | <0.001  |
| Current                                     | 1.39               | 1.35   | — | 1.44 | <0.001  | 1.29          | 1.20   | — | 1.39  | <0.001  | 1.24  | 1.17   | — | 1.32  | <0.001  |
| Urban/rural/highly rural residence          |                    |        |   |      |         |               |        |   |       |         |       |        |   |       |         |
| Highly rural                                | 0.57               | 0.50   | — | 0.66 | <0.001  | 0.74          | 0.54   | — | 1.00  | 0.051   | 1.16  | 0.97   | — | 1.38  | 0.096   |
| Rural                                       | 0.70               | 0.68   | — | 0.72 | <0.001  | 0.88          | 0.82   | — | 0.93  | <0.001  | 1.04  | 0.99   | — | 1.08  | 0.140   |
| Urban                                       | ref                |        |   |      |         | ref           |        |   |       |         | ref   |        |   |       |         |
| Unknown                                     | 0.27               | 0.10   | — | 0.74 | 0.011   | 0.55          | 0.08   | — | 3.96  | 0.549   | 1.75  | 0.72   | — | 4.25  | 0.220   |
| Diabetes                                    | 1.29               | 1.26   | — | 1.33 | <0.001  | 1.26          | 1.19   | — | 1.33  | <0.001  | 1.36  | 1.30   | — | 1.42  | <0.001  |
| Hypertension                                | 1.30               | 1.25   | — | 1.35 | <0.001  | 1.29          | 1.18   | — | 1.41  | <0.001  | 0.96  | 0.90   | — | 1.02  | 0.149   |
| Cardiovascular disease                      | 1.84               | 1.78   | — | 1.89 | <0.001  | 2.08          | 1.94   | — | 2.23  | <0.001  | 1.24  | 1.18   | — | 1.30  | <0.001  |
| Heart failure                               | 1.64               | 1.58   | — | 1.69 | <0.001  | 1.53          | 1.43   | — | 1.63  | <0.001  | 1.31  | 1.25   | — | 1.38  | <0.001  |
| Alcohol use disorder                        | 0.75               | 0.73   | — | 0.78 | <0.001  | 0.86          | 0.79   | — | 0.93  | <0.001  | 0.69  | 0.64   | — | 0.73  | <0.001  |

1 **Table 3 CONTINUED.** Odds ratios from logistic regression models testing the association of individual statins compared to no statin with adverse 30-day outcomes  
2 among VHA Veterans with a positive respiratory swab for SARS-CoV-2, n=231,017

| Estimated glomerular filtration rate,<br>ml/min/1.73 m <sup>2</sup> | ref  |      |   |      |        | ref  |      |   |      |        | ref  |      |   |      |        |
|---------------------------------------------------------------------|------|------|---|------|--------|------|------|---|------|--------|------|------|---|------|--------|
| ≥ 90                                                                | 0.90 | 0.87 | — | 0.93 | <0.001 | 0.96 | 0.88 | — | 1.04 | 0.273  | 1.10 | 1.02 | — | 1.18 | 0.018  |
| 60-89                                                               | 0.99 | 0.94 | — | 1.03 | 0.519  | 1.00 | 0.91 | — | 1.10 | 0.941  | 1.44 | 1.33 | — | 1.56 | <0.001 |
| 45-59                                                               | 1.10 | 1.04 | — | 1.16 | 0.001  | 1.15 | 1.02 | — | 1.29 | 0.024  | 1.83 | 1.68 | — | 1.99 | <0.001 |
| 30-44                                                               | 1.31 | 1.21 | — | 1.42 | <0.001 | 1.32 | 1.14 | — | 1.53 | <0.001 | 2.65 | 2.36 | — | 2.97 | <0.001 |
| 15-29                                                               | 1.45 | 1.32 | — | 1.59 | <0.001 | 1.51 | 1.29 | — | 1.77 | <0.001 | 2.48 | 2.16 | — | 2.84 | <0.001 |
| <15 or dialysis                                                     |      |      |   |      |        |      |      |   |      |        |      |      |   |      |        |

10 Models additionally adjusted for month of diagnosis and geographic location by Veterans Integrated Service Network location; not adjusted for the presence of an active statin  
11 prescription six months prior to enrollment

For peer review only

12  
13  
14  
15  
16  
17  
18  
19  
20  
21  
22  
23  
24  
25  
26  
27  
28  
29  
30  
31  
32  
33  
34  
35  
36  
37  
38  
39  
40  
41  
42  
43  
44  
45  
46  
47

**Table 4.** Odds ratios from logistic regression models testing the association of low- or moderate- vs. high-potency active statin prescription at enrollment with adverse 30-day outcomes among VHA Veterans with a positive respiratory swab for SARS-CoV-2, n=69,263

|                                                                  | Hospital admission |             |  |         |  | ICU admission |              |  |         |  | Death |              |  |         |  |
|------------------------------------------------------------------|--------------------|-------------|--|---------|--|---------------|--------------|--|---------|--|-------|--------------|--|---------|--|
|                                                                  | OR                 | 95% CI      |  | p value |  | OR            | 95% CI       |  | p value |  | OR    | 95% CI       |  | p value |  |
| High-potency statin                                              | 1.06               | 1.01 — 1.10 |  | 0.011   |  | 1.05          | 0.96 — 1.15  |  | 0.258   |  | 0.97  | 0.91 — 1.04  |  | 0.407   |  |
| Sex at birth, female                                             | 0.89               | 0.80 — 1.00 |  | 0.041   |  | 0.95          | 0.75 — 1.19  |  | 0.634   |  | 0.52  | 0.40 — 0.68  |  | <0.001  |  |
| Age category, years                                              |                    |             |  |         |  |               |              |  |         |  |       |              |  |         |  |
| 19-39                                                            | 0.82               | 0.63 — 1.06 |  | 0.123   |  | 0.46          | 0.22 — 0.98  |  | 0.045   |  | 0.10  | 0.01 — 0.73  |  | 0.023   |  |
| 40-49                                                            | 0.74               | 0.64 — 0.86 |  | <0.001  |  | 0.55          | 0.38 — 0.79  |  | 0.001   |  | 0.45  | 0.27 — 0.75  |  | 0.002   |  |
| 50-59                                                            | ref                |             |  |         |  | ref           |              |  |         |  | ref   |              |  |         |  |
| 60-69                                                            | 1.30               | 1.20 — 1.40 |  | <0.001  |  | 1.24          | 1.06 — 1.45  |  | 0.009   |  | 2.45  | 2.02 — 2.96  |  | <0.001  |  |
| 70-79                                                            | 1.47               | 1.36 — 1.58 |  | <0.001  |  | 1.47          | 1.25 — 1.72  |  | <0.001  |  | 4.42  | 3.67 — 5.32  |  | <0.001  |  |
| ≥80                                                              | 1.95               | 1.78 — 2.15 |  | <0.001  |  | 1.69          | 1.40 — 2.04  |  | <0.001  |  | 9.54  | 7.84 — 11.60 |  | <0.001  |  |
| White (vs not white)                                             | 0.81               | 0.69 — 0.96 |  | 0.012   |  | 0.75          | 0.52 — 1.08  |  | 0.118   |  | 0.85  | 0.64 — 1.11  |  | 0.221   |  |
| Black vs( not Black)                                             | 1.31               | 1.10 — 1.55 |  | 0.002   |  | 1.12          | 0.77 — 1.63  |  | 0.545   |  | 0.80  | 0.60 — 1.06  |  | 0.125   |  |
| Hispanic (vs not Hispanic)                                       | 1.12               | 1.02 — 1.22 |  | 0.013   |  | 0.91          | 0.75 — 1.10  |  | 0.330   |  | 1.20  | 1.04 — 1.38  |  | 0.014   |  |
| Body-mass index category, kg/m <sup>2</sup>                      |                    |             |  |         |  |               |              |  |         |  |       |              |  |         |  |
| <18.5                                                            | 1.04               | 0.79 — 1.38 |  | 0.766   |  | 1.19          | 0.71 — 1.98  |  | 0.511   |  | 1.45  | 1.02 — 2.05  |  | 0.039   |  |
| 18.5-24.9                                                        | ref                |             |  |         |  | ref           |              |  |         |  | ref   |              |  |         |  |
| 25-29.9                                                          | 0.81               | 0.75 — 0.86 |  | <0.001  |  | 0.89          | 0.77 — 1.02  |  | 0.095   |  | 0.78  | 0.70 — 0.87  |  | <0.001  |  |
| 30-34.9                                                          | 0.78               | 0.73 — 0.84 |  | <0.001  |  | 0.92          | 0.80 — 1.07  |  | 0.272   |  | 0.78  | 0.70 — 0.87  |  | <0.001  |  |
| 35-39.9                                                          | 0.78               | 0.71 — 0.85 |  | <0.001  |  | 0.90          | 0.76 — 1.06  |  | 0.188   |  | 0.75  | 0.67 — 0.85  |  | <0.001  |  |
| ≥40                                                              | 0.86               | 0.77 — 0.95 |  | 0.002   |  | 1.08          | 0.89 — 1.30  |  | 0.452   |  | 0.91  | 0.78 — 1.06  |  | 0.221   |  |
| Tobacco use                                                      |                    |             |  |         |  |               |              |  |         |  |       |              |  |         |  |
| Never                                                            | ref                |             |  |         |  | ref           |              |  |         |  | ref   |              |  |         |  |
| Former                                                           | 1.18               | 1.12 — 1.25 |  | <0.001  |  | 1.16          | 1.03 — 1.30  |  | 0.013   |  | 1.29  | 1.18 — 1.40  |  | <0.001  |  |
| Current                                                          | 1.36               | 1.28 — 1.44 |  | <0.001  |  | 1.36          | 1.19 — 1.55  |  | <0.001  |  | 1.21  | 1.09 — 1.34  |  | <0.001  |  |
| Urban/rural/highly rural residence                               |                    |             |  |         |  |               |              |  |         |  |       |              |  |         |  |
| Highly rural                                                     | 0.59               | 0.47 — 0.73 |  | <0.001  |  | 0.93          | 0.61 — 1.42  |  | 0.728   |  | 1.40  | 1.08 — 1.82  |  | 0.011   |  |
| Rural                                                            | 0.68               | 0.65 — 0.72 |  | <0.001  |  | 0.87          | 0.79 — 0.96  |  | 0.006   |  | 1.05  | 0.97 — 1.12  |  | 0.233   |  |
| Urban                                                            | ref                |             |  |         |  | ref           |              |  |         |  | ref   |              |  |         |  |
| Unknown                                                          | 0.17               | 0.02 — 1.26 |  | 0.083   |  | 1.69          | 0.22 — 12.83 |  | 0.612   |  | 1.41  | 0.31 — 6.48  |  | 0.662   |  |
| Diabetes                                                         | 1.29               | 1.23 — 1.35 |  | <0.001  |  | 1.16          | 1.05 — 1.27  |  | 0.003   |  | 1.31  | 1.22 — 1.41  |  | <0.001  |  |
| Hypertension                                                     | 1.28               | 1.18 — 1.39 |  | <0.001  |  | 1.38          | 1.14 — 1.67  |  | 0.001   |  | 0.98  | 0.85 — 1.11  |  | 0.704   |  |
| Cardiovascular disease                                           | 1.71               | 1.62 — 1.80 |  | <0.001  |  | 1.96          | 1.75 — 2.21  |  | <0.001  |  | 1.25  | 1.14 — 1.36  |  | <0.001  |  |
| Heart failure                                                    | 1.68               | 1.60 — 1.77 |  | <0.001  |  | 1.58          | 1.44 — 1.74  |  | <0.001  |  | 1.33  | 1.23 — 1.43  |  | <0.001  |  |
| Alcohol use disorder                                             | 0.66               | 0.62 — 0.71 |  | <0.001  |  | 0.81          | 0.71 — 0.94  |  | 0.004   |  | 0.69  | 0.61 — 0.77  |  | <0.001  |  |
| Estimated glomerular filtration rate, ml/min/1.73 m <sup>2</sup> |                    |             |  |         |  |               |              |  |         |  |       |              |  |         |  |
| ≥ 90                                                             | ref                |             |  |         |  | ref           |              |  |         |  | ref   |              |  |         |  |
| 60-89                                                            | 0.98               | 0.92 — 1.05 |  | 0.625   |  | 1.05          | 0.91 — 1.20  |  | 0.538   |  | 1.14  | 1.01 — 1.29  |  | 0.041   |  |
| 45-59                                                            | 1.08               | 1.00 — 1.16 |  | 0.050   |  | 1.05          | 0.90 — 1.24  |  | 0.530   |  | 1.58  | 1.37 — 1.82  |  | <0.001  |  |
| 30-44                                                            | 1.21               | 1.10 — 1.32 |  | <0.001  |  | 1.20          | 1.00 — 1.44  |  | 0.055   |  | 2.00  | 1.72 — 2.33  |  | <0.001  |  |
| 15-29                                                            | 1.53               | 1.35 — 1.72 |  | <0.001  |  | 1.37          | 1.09 — 1.72  |  | 0.007   |  | 3.19  | 2.69 — 3.78  |  | <0.001  |  |
| <15 or dialysis                                                  | 1.64               | 1.42 — 1.90 |  | <0.001  |  | 1.95          | 1.52 — 2.50  |  | <0.001  |  | 3.01  | 2.44 — 3.73  |  | <0.001  |  |

Models additionally adjusted for month of diagnosis and geographic location by Veterans Integrated Service Network location; not adjusted for the presence of an active statin prescription six months prior to enrollment



**Figure Legend**

1  
2 Fig. 1. ORs and 95% confidence intervals for associations of statin use at study enrollment with A) hospitalization, B) ICU admission, and C) death  
3  
4 at 30 days before and after adjustment for statin use six months prior to diagnosis among VHA Veterans with and without a positive respiratory  
5  
6 swab for SARS-CoV-2. All analyses are adjusted for sex, age, race/ethnicity, BMI, tobacco use, facility location, urban/rural status, eGFR, and  
7  
8 history of diabetes, hypertension, cardiovascular disease, heart failure, and alcohol use disorder.  
9  
10  
11  
12  
13  
14  
15  
16  
17  
18  
19  
20  
21  
22  
23  
24  
25  
26  
27  
28  
29  
30  
31  
32  
33  
34  
35  
36  
37  
38  
39  
40  
41  
42  
43  
44  
45  
46  
47

For peer review only

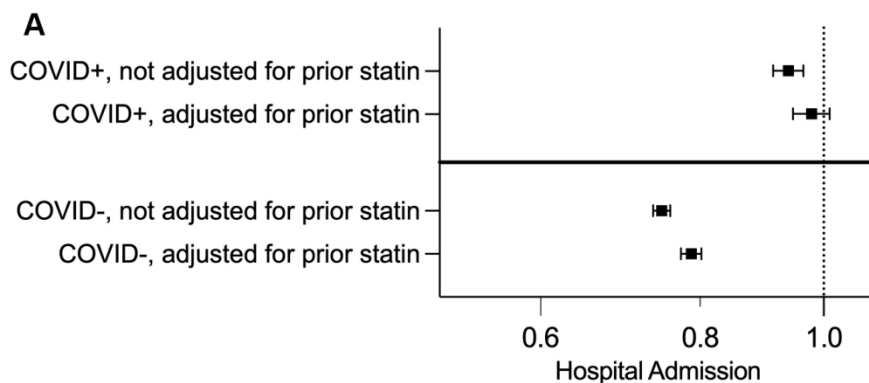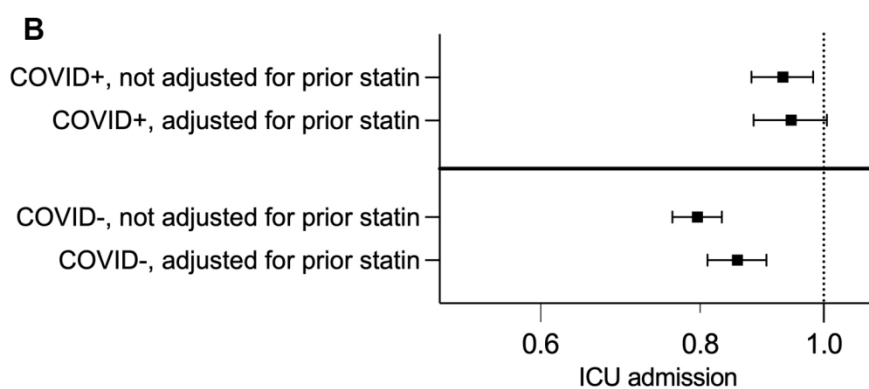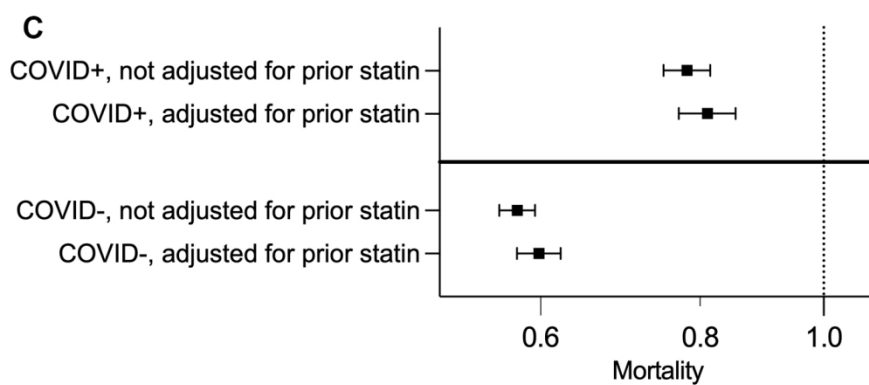

123x166mm (300 x 300 DPI)

1  
2  
3  
4  
5  
6  
7  
8  
9  
10  
11  
12  
13  
14  
15  
16  
17  
18  
19  
20  
21  
22  
23  
24  
25  
26  
27  
28  
29  
30  
31  
32  
33  
34  
35  
36  
37  
38  
39  
40  
41  
42  
43  
44  
45  
46  
47  
48  
49  
50  
51  
52  
53  
54  
55  
56  
57  
58  
59  
60

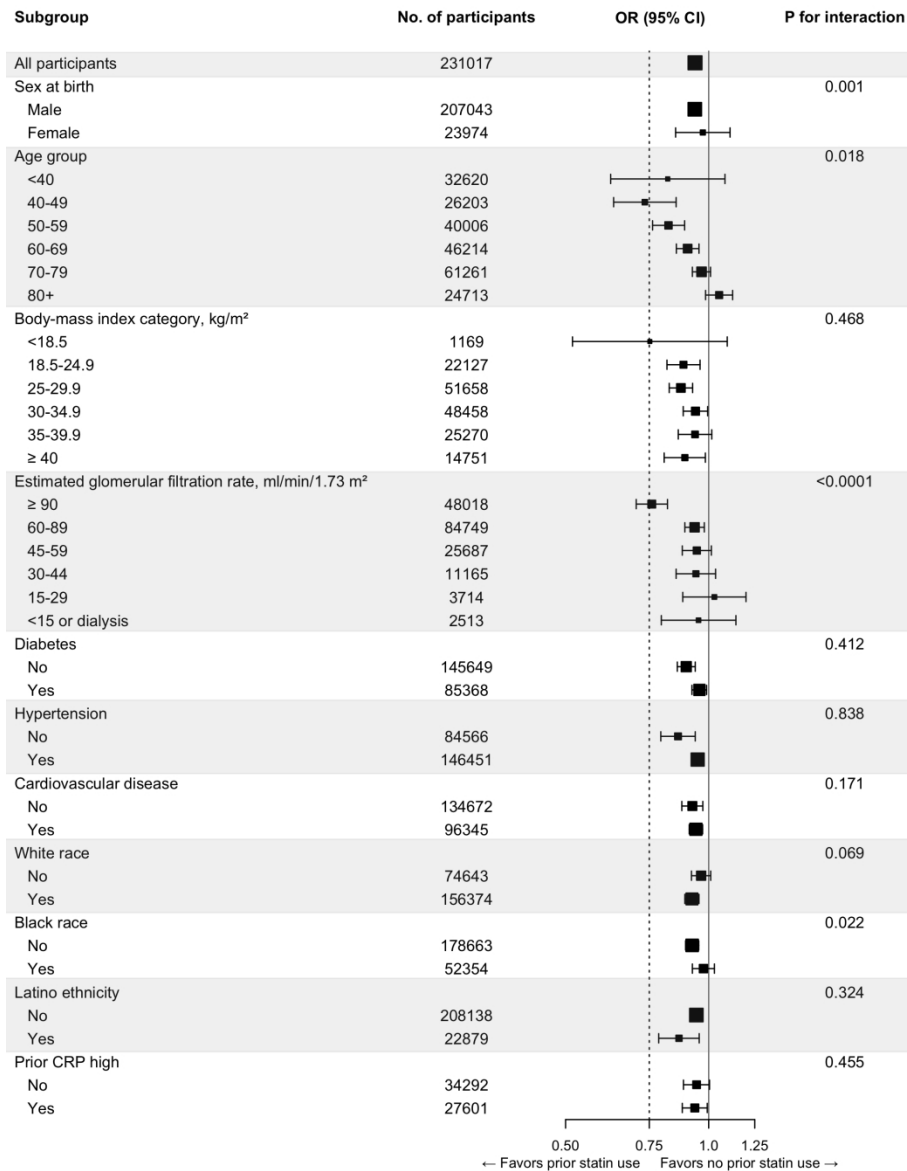

762x1005mm (72 x 72 DPI)

1  
2  
3  
4  
5  
6  
7  
8  
9  
10  
11  
12  
13  
14  
15  
16  
17  
18  
19  
20  
21  
22  
23  
24  
25  
26  
27  
28  
29  
30  
31  
32  
33  
34  
35  
36  
37  
38  
39  
40  
41  
42  
43  
44  
45  
46  
47  
48  
49  
50  
51  
52  
53  
54  
55  
56  
57  
58  
59  
60

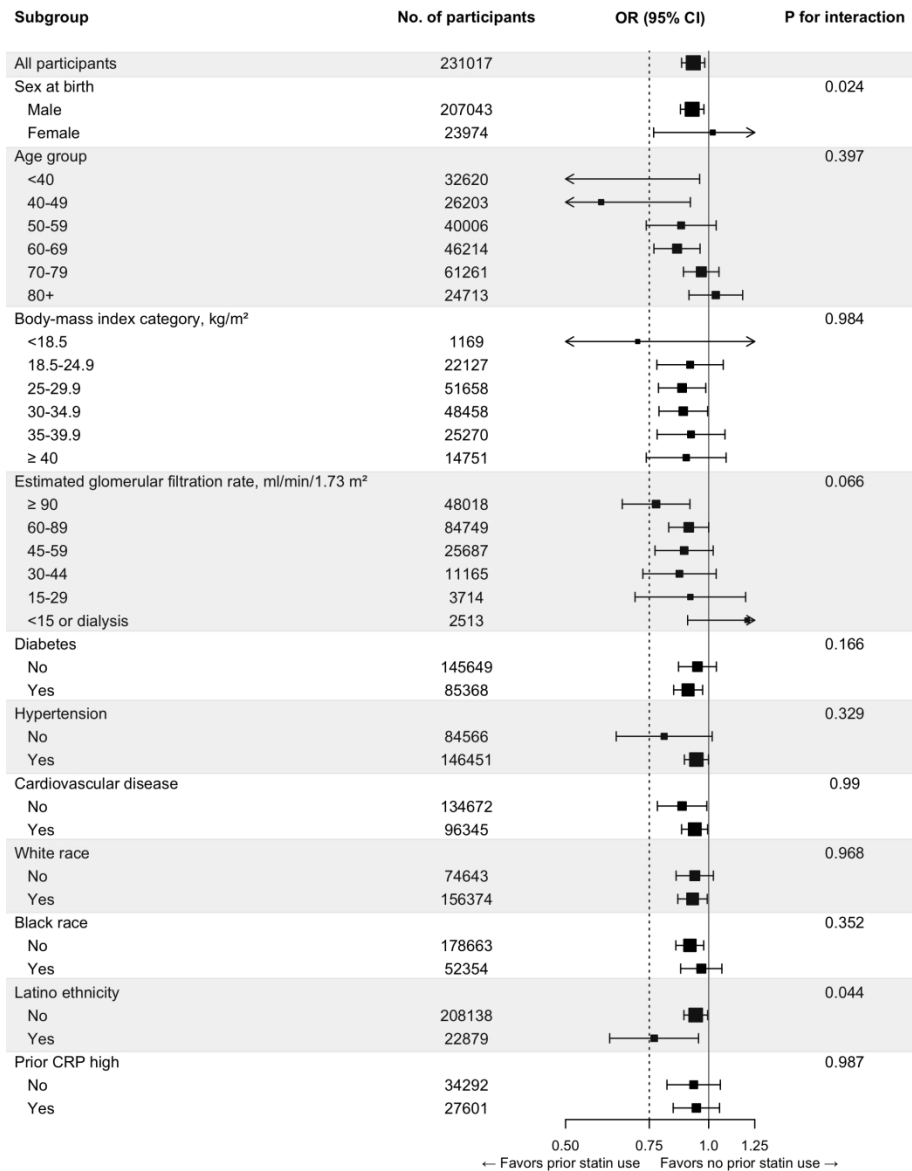

762x1005mm (72 x 72 DPI)

1  
2  
3  
4  
5  
6  
7  
8  
9  
10  
11  
12  
13  
14  
15  
16  
17  
18  
19  
20  
21  
22  
23  
24  
25  
26  
27  
28  
29  
30  
31  
32  
33  
34  
35  
36  
37  
38  
39  
40  
41  
42  
43  
44  
45  
46  
47  
48  
49  
50  
51  
52  
53  
54  
55  
56  
57  
58  
59  
60

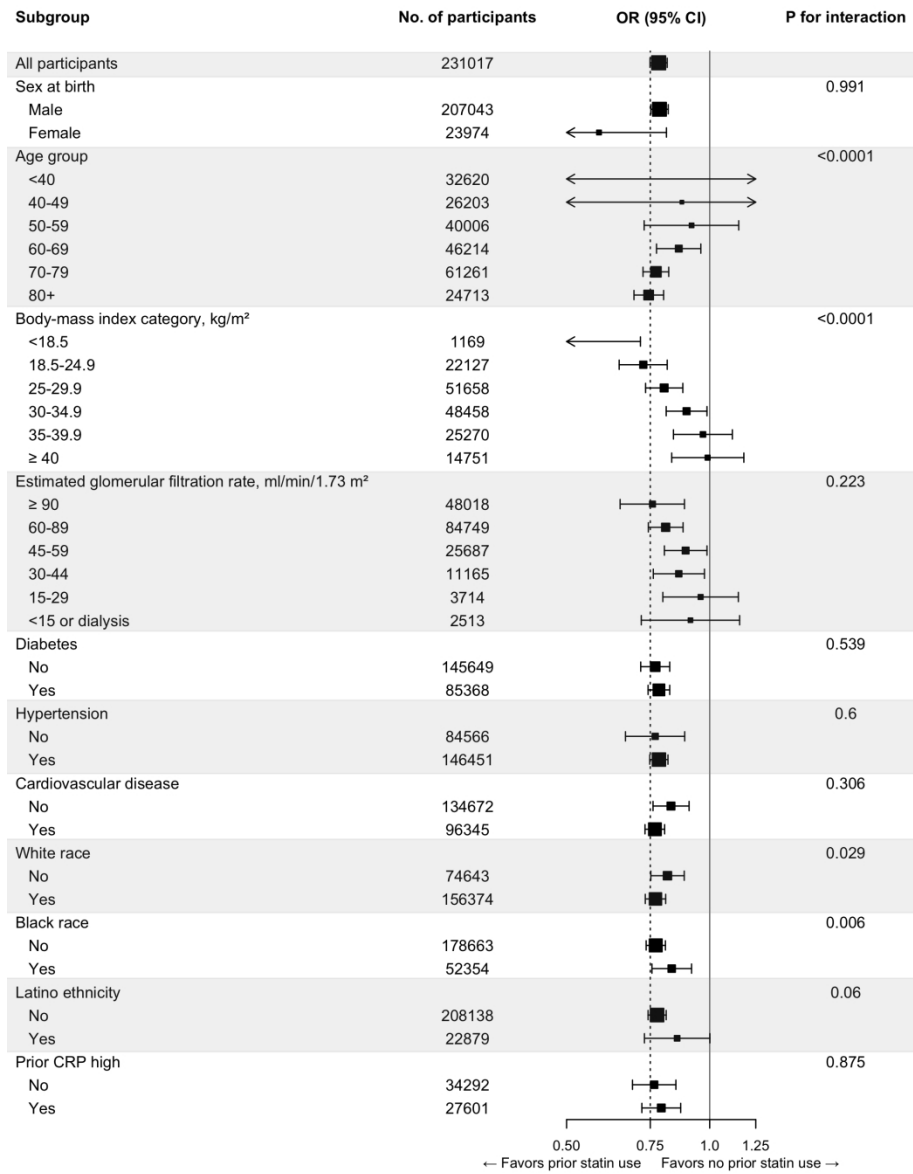

762x1005mm (72 x 72 DPI)

STROBE Statement—Checklist of items that should be included in reports of *cohort studies*

|                              | Item No | Recommendation                                                                                                                                                                                                                                                                                                         | Page No |
|------------------------------|---------|------------------------------------------------------------------------------------------------------------------------------------------------------------------------------------------------------------------------------------------------------------------------------------------------------------------------|---------|
| <b>Title and abstract</b>    | 1       | (a) Indicate the study's design with a commonly used term in the title or the abstract<br>(b) Provide in the abstract an informative and balanced summary of what was done and what was found                                                                                                                          | 1       |
| <b>Introduction</b>          |         |                                                                                                                                                                                                                                                                                                                        |         |
| Background/rationale         | 2       | Explain the scientific background and rationale for the investigation being reported                                                                                                                                                                                                                                   | 4       |
| Objectives                   | 3       | State specific objectives, including any prespecified hypotheses                                                                                                                                                                                                                                                       | 4       |
| <b>Methods</b>               |         |                                                                                                                                                                                                                                                                                                                        |         |
| Study design                 | 4       | Present key elements of study design early in the paper                                                                                                                                                                                                                                                                | 4       |
| Setting                      | 5       | Describe the setting, locations, and relevant dates, including periods of recruitment, exposure, follow-up, and data collection                                                                                                                                                                                        | 5       |
| Participants                 | 6       | (a) Give the eligibility criteria, and the sources and methods of selection of participants. Describe methods of follow-up<br>(b) For matched studies, give matching criteria and number of exposed and unexposed                                                                                                      | 5       |
| Variables                    | 7       | Clearly define all outcomes, exposures, predictors, potential confounders, and effect modifiers. Give diagnostic criteria, if applicable                                                                                                                                                                               | 6       |
| Data sources/<br>measurement | 8*      | For each variable of interest, give sources of data and details of methods of assessment (measurement). Describe comparability of assessment methods if there is more than one group                                                                                                                                   | 6       |
| Bias                         | 9       | Describe any efforts to address potential sources of bias                                                                                                                                                                                                                                                              | 6       |
| Study size                   | 10      | Explain how the study size was arrived at                                                                                                                                                                                                                                                                              | 5       |
| Quantitative variables       | 11      | Explain how quantitative variables were handled in the analyses. If applicable, describe which groupings were chosen and why                                                                                                                                                                                           | 6       |
| Statistical methods          | 12      | (a) Describe all statistical methods, including those used to control for confounding<br>(b) Describe any methods used to examine subgroups and interactions<br>(c) Explain how missing data were addressed<br>(d) If applicable, explain how loss to follow-up was addressed<br>(e) Describe any sensitivity analyses | 6       |
| <b>Results</b>               |         |                                                                                                                                                                                                                                                                                                                        |         |
| Participants                 | 13*     | (a) Report numbers of individuals at each stage of study—eg numbers potentially eligible, examined for eligibility, confirmed eligible, included in the study, completing follow-up, and analysed<br>(b) Give reasons for non-participation at each stage<br>(c) Consider use of a flow diagram                        | 7       |
| Descriptive data             | 14*     | (a) Give characteristics of study participants (eg demographic, clinical, social) and information on exposures and potential confounders<br>(b) Indicate number of participants with missing data for each variable of interest<br>(c) Summarise follow-up time (eg, average and total amount)                         | 7       |
| Outcome data                 | 15*     | Report numbers of outcome events or summary measures over time                                                                                                                                                                                                                                                         | 7       |

|    |                          |    |                                                                                                                                                                                                              |    |
|----|--------------------------|----|--------------------------------------------------------------------------------------------------------------------------------------------------------------------------------------------------------------|----|
| 1  | Main results             | 16 | (a) Give unadjusted estimates and, if applicable, confounder-adjusted estimates and their precision (eg, 95% confidence interval). Make clear which confounders were adjusted for and why they were included | 8  |
| 2  |                          |    | (b) Report category boundaries when continuous variables were categorized                                                                                                                                    |    |
| 3  |                          |    | (c) If relevant, consider translating estimates of relative risk into absolute risk for a meaningful time period                                                                                             |    |
| 4  |                          |    |                                                                                                                                                                                                              |    |
| 5  |                          |    |                                                                                                                                                                                                              |    |
| 6  |                          |    |                                                                                                                                                                                                              |    |
| 7  |                          |    |                                                                                                                                                                                                              |    |
| 8  |                          |    |                                                                                                                                                                                                              |    |
| 9  | Other analyses           | 17 | Report other analyses done—eg analyses of subgroups and interactions, and sensitivity analyses                                                                                                               | 8  |
| 10 |                          |    |                                                                                                                                                                                                              |    |
| 11 | <b>Discussion</b>        |    |                                                                                                                                                                                                              |    |
| 12 |                          |    |                                                                                                                                                                                                              |    |
| 13 | Key results              | 18 | Summarise key results with reference to study objectives                                                                                                                                                     | 8  |
| 14 | Limitations              | 19 | Discuss limitations of the study, taking into account sources of potential bias or imprecision. Discuss both direction and magnitude of any potential bias                                                   | 10 |
| 15 |                          |    |                                                                                                                                                                                                              |    |
| 16 | Interpretation           | 20 | Give a cautious overall interpretation of results considering objectives, limitations, multiplicity of analyses, results from similar studies, and other relevant evidence                                   | 9  |
| 17 |                          |    |                                                                                                                                                                                                              |    |
| 18 |                          |    |                                                                                                                                                                                                              |    |
| 19 | Generalisability         | 21 | Discuss the generalisability (external validity) of the study results                                                                                                                                        | 10 |
| 20 |                          |    |                                                                                                                                                                                                              |    |
| 21 | <b>Other information</b> |    |                                                                                                                                                                                                              |    |
| 22 | Funding                  | 22 | Give the source of funding and the role of the funders for the present study and, if applicable, for the original study on which the present article is based                                                | 3  |
| 23 |                          |    |                                                                                                                                                                                                              |    |
| 24 |                          |    |                                                                                                                                                                                                              |    |

25  
26 \*Give information separately for exposed and unexposed groups.

27  
28 **Note:** An Explanation and Elaboration article discusses each checklist item and gives methodological background and  
29 published examples of transparent reporting. The STROBE checklist is best used in conjunction with this article (freely  
30 available on the Web sites of PLoS Medicine at <http://www.plosmedicine.org/>, Annals of Internal Medicine at  
31 <http://www.annals.org/>, and Epidemiology at <http://www.epidem.com/>). Information on the STROBE Initiative is  
32 available at <http://www.strobe-statement.org>.  
33  
34  
35  
36  
37  
38  
39  
40  
41  
42  
43  
44  
45  
46  
47  
48  
49  
50  
51  
52  
53  
54  
55  
56  
57  
58  
59  
60

# BMJ Open

## Associations of statin use with 30-day adverse outcomes among 4,801,406 U.S. Veterans with and without SARS-CoV-2: An observational cohort study

|                                 |                                                                                                                                                                                                                                                                                                                                                                                                                                                                                                                                                                                                                                                                                                                                                                                                                                                                                                                                             |
|---------------------------------|---------------------------------------------------------------------------------------------------------------------------------------------------------------------------------------------------------------------------------------------------------------------------------------------------------------------------------------------------------------------------------------------------------------------------------------------------------------------------------------------------------------------------------------------------------------------------------------------------------------------------------------------------------------------------------------------------------------------------------------------------------------------------------------------------------------------------------------------------------------------------------------------------------------------------------------------|
| Journal:                        | <i>BMJ Open</i>                                                                                                                                                                                                                                                                                                                                                                                                                                                                                                                                                                                                                                                                                                                                                                                                                                                                                                                             |
| Manuscript ID                   | bmjopen-2021-058363.R1                                                                                                                                                                                                                                                                                                                                                                                                                                                                                                                                                                                                                                                                                                                                                                                                                                                                                                                      |
| Article Type:                   | Original research                                                                                                                                                                                                                                                                                                                                                                                                                                                                                                                                                                                                                                                                                                                                                                                                                                                                                                                           |
| Date Submitted by the Author:   | 22-Dec-2021                                                                                                                                                                                                                                                                                                                                                                                                                                                                                                                                                                                                                                                                                                                                                                                                                                                                                                                                 |
| Complete List of Authors:       | Wander, Pandora; VA Puget Sound Health Care System Seattle Division; University of Washington, Department of Medicine<br>Lowy, Elliott; Veterans Affairs Puget Sound Health Care System; University of Washington, Department of Health Systems and Population Health<br>Beste, Lauren A.; Veterans Affairs Puget Sound Health Care System; University of Washington, Department of Medicine<br>Tulloch-Palomino, Luis; Veterans Affairs Puget Sound Health Care System; University of Washington, Department of Medicine<br>Korpak, Anna; Veterans Affairs Puget Sound Health Care System<br>Peterson, Alexander; Veterans Affairs Puget Sound Health Care System<br>Kahn, Steven E.; University of Washington<br>Danaei, Goodarz; Harvard School of Public Health, Department of Global Health and Population<br>Boyko, Edward J.; Veterans Affairs Puget Sound Health Care System, Seattle Epidemiologic Research and Information Center |
| <b>Primary Subject Heading</b>: | Public health                                                                                                                                                                                                                                                                                                                                                                                                                                                                                                                                                                                                                                                                                                                                                                                                                                                                                                                               |
| Secondary Subject Heading:      | Epidemiology, Infectious diseases, General practice / Family practice                                                                                                                                                                                                                                                                                                                                                                                                                                                                                                                                                                                                                                                                                                                                                                                                                                                                       |
| Keywords:                       | COVID-19, Epidemiology < TROPICAL MEDICINE, INTERNAL MEDICINE                                                                                                                                                                                                                                                                                                                                                                                                                                                                                                                                                                                                                                                                                                                                                                                                                                                                               |
|                                 |                                                                                                                                                                                                                                                                                                                                                                                                                                                                                                                                                                                                                                                                                                                                                                                                                                                                                                                                             |

SCHOLARONE™  
Manuscripts





I, the Submitting Author has the right to grant and does grant on behalf of all authors of the Work (as defined in the below author licence), an exclusive licence and/or a non-exclusive licence for contributions from authors who are: i) UK Crown employees; ii) where BMJ has agreed a CC-BY licence shall apply, and/or iii) in accordance with the terms applicable for US Federal Government officers or employees acting as part of their official duties; on a worldwide, perpetual, irrevocable, royalty-free basis to BMJ Publishing Group Ltd ("BMJ") its licensees and where the relevant Journal is co-owned by BMJ to the co-owners of the Journal, to publish the Work in this journal and any other BMJ products and to exploit all rights, as set out in our [licence](#).

The Submitting Author accepts and understands that any supply made under these terms is made by BMJ to the Submitting Author unless you are acting as an employee on behalf of your employer or a postgraduate student of an affiliated institution which is paying any applicable article publishing charge ("APC") for Open Access articles. Where the Submitting Author wishes to make the Work available on an Open Access basis (and intends to pay the relevant APC), the terms of reuse of such Open Access shall be governed by a Creative Commons licence – details of these licences and which [Creative Commons](#) licence will apply to this Work are set out in our licence referred to above.

Other than as permitted in any relevant BMJ Author's Self Archiving Policies, I confirm this Work has not been accepted for publication elsewhere, is not being considered for publication elsewhere and does not duplicate material already published. I confirm all authors consent to publication of this Work and authorise the granting of this licence.

1 **Associations of statin use with 30-day adverse outcomes among 4,801,406 U.S. Veterans with and**  
2 **without SARS-CoV-2: An observational cohort study**  
3  
4  
5

6 **Authors:** Pandora L Wander, MD, MS<sup>a,b</sup>; Elliott Lowy, PhD<sup>a,c</sup>; Lauren A Beste, MD, MSc<sup>a,b</sup>; Luis Tulloch-  
7 Palomino, MD<sup>a,b</sup>; Anna Korpak, PhD<sup>a</sup>; Alexander C Peterson, MSc<sup>a</sup>; Steven E Kahn, MB, ChB<sup>a,b</sup>; Goodarz  
8 Danaei, MD, ScD<sup>d</sup>; Edward J Boyko, MD, MPH<sup>a,b</sup>  
9  
10  
11  
12  
13  
14

15 **Affiliations:**

16  
17 <sup>a</sup>Veterans Affairs Puget Sound Health Care System, Seattle, WA  
18

19 <sup>b</sup>Department of Medicine, University of Washington, Seattle, WA  
20

21 <sup>c</sup>Department of Health Systems and Population Health, University of Washington, Seattle, WA  
22

23 <sup>d</sup>Departments of Global Health and Population, Epidemiology, Harvard T.H. Chan School of Public Health,  
24 Boston, MA  
25  
26  
27  
28  
29

30 Correspondence to:

31 Pandora L. Wander

32 VA Puget Sound Healthcare System

33  
34 1660 S. Columbian Way, S-111-MED

35  
36  
37  
38 Seattle, WA 98108

39  
40 [lwander@u.washington.edu](mailto:lwander@u.washington.edu)  
41

42 ORCID: 0000-0003-3671-1464  
43  
44  
45

46 Running title: Statin use and 30-day outcomes in SAR-CoV-2  
47  
48  
49  
50

51 Word count (not including title, abstract, acknowledgment, references, tables, and figure legends): 2,900  
52  
53  
54  
55  
56  
57  
58  
59  
60

**ABSTRACT**

**Objective:** To estimate associations of statin use with hospitalization, intensive care unit (ICU) admission, and mortality at 30 days among individuals with and without a positive test for SARS-CoV-2

**Design:** Retrospective cohort study

**Setting:** U.S. Veterans Health Administration (VHA)

**Participants:** All Veterans receiving VHA health care with  $\geq 1$  positive nasal swab for SARS-CoV-2 between March 1, 2020 and March 10, 2021 (cases;  $n=231,154$ ) and a comparator group of controls comprising all Veterans who did not have a positive nasal swab for SARS-CoV-2 but who did have  $\geq 1$  clinical lab test performed during the same time period ( $n=4,570,252$ ).

**Main outcomes:** Associations of (1) Any statin use, (2) use of specific statins, or (3) low-/moderate- vs. high-intensity statin use at the time of positive nasal swab for SARS-CoV-2 (cases) or result of clinical lab test (controls) assessed from pharmacy records with hospitalization, ICU admission, and death at 30 days. We also examined whether associations differed between individuals with and without a positive test for SARS-CoV-2.

**Results:** Among individuals who tested positive for SARS-CoV-2, statin use was associated with lower odds of death at 30 days (OR 0.81 [95%CI 0.77–0.85]) but not with hospitalization or ICU admission. Associations were similar comparing use of each specific statin to no statin. Compared to low-/moderate-intensity statin use, high-intensity statin use was not associated with lower odds of ICU admission or death. Over the same time period, associations of statin use with 30-day outcomes were significantly stronger among individuals without a positive test for SARS-CoV-2: hospitalization OR 0.79 (95%CI 0.77–0.80), ICU admission OR 0.86 (95%CI 0.81–0.90), and death 0.60 (95%CI 0.58–0.62),  $p$  for interaction all  $<0.001$ .

1 **Conclusions:** Associations of statin use with lower adverse 30-day outcomes are weaker among individuals  
2 who tested positive for SARS-CoV-2 compared to individuals without a positive test, indicating that statins do  
3 not exert SARS-CoV-2-specific effects.  
4  
5  
6  
7  
8  
9  
10  
11  
12

### 13 **Strengths and limitations of this study**

- 14 - Large, well characterized national (U.S.) sample
- 15 - First study to formally assess and compare statin effects seen in SARS-CoV-2 infection using a  
16 negative control
- 17 - Observational design cannot exclude the possibility of residual confounding
- 18 - Did not capture hospitalizations or diagnoses occurring outside VHA

19 **Funding Source:** VA Clinical Science Research & Development COVID19-8990-19  
20  
21  
22  
23  
24  
25  
26  
27  
28  
29  
30  
31  
32  
33  
34  
35  
36  
37  
38  
39  
40  
41  
42  
43  
44  
45  
46  
47  
48  
49  
50  
51  
52  
53  
54  
55  
56  
57  
58  
59  
60

## INTRODUCTION

1  
2 New cases of COVID-19/SARS-CoV-2 infection continue to occur at high rates in the United States and  
3  
4 worldwide with few treatments available to decrease mortality. Statin use at the time of COVID-19 diagnosis  
5  
6 has been associated with a lower risk of short-term mortality in observational studies<sup>1</sup> and systematic reviews<sup>2</sup>.  
7  
8 Based on these early findings and their demonstrated effects on inflammation, oxidative stress, and immune  
9  
10 responses, statins have been proposed as a low-cost, accessible, and effective treatment for COVID-19<sup>3</sup>.  
11  
12 However, an inverse association of statin use with mortality is not uniformly seen across observational studies  
13  
14 of persons with COVID-19<sup>4 5</sup>. Further, preliminary findings from a randomized placebo-controlled trial of  
15  
16 patients admitted to the ICU did not show a protective effect of atorvastatin 20 mg/day on 30-day mortality after  
17  
18 COVID-19 diagnosis, among patients not taking statins prior to admission<sup>6</sup>. These paradoxical findings may  
19  
20 reflect the presence of residual confounding in observational studies. In addition, effects of statins on mortality  
21  
22 after COVID-19 may differ across populations, for example, among individuals with or without cardiovascular  
23  
24 disease (CVD), or specific to certain statins but not all medications in this class. Therefore, observational  
25  
26 studies with comprehensive strategies to examine potential bias from unmeasured confounding—such as the  
27  
28 use of negative control populations<sup>2</sup>—are needed to improve estimates of the potential causal effect of statin  
29  
30 use at diagnosis on mortality after COVID-19.  
31  
32  
33  
34  
35

36 To address these gaps, we used national data from the Veterans Health Administration (VHA) to quantify the  
37  
38 independent association of statin use at diagnosis with adverse outcomes from COVID-19 at 30 days,  
39  
40 including hospitalization, intensive-care unit (ICU) admission, and mortality. We used the following strategies to  
41  
42 mitigate or estimate bias: 1) directed-acyclic graphs to guide the choice of potential confounders; 2)  
43  
44 comparison of associations among SARS-CoV-2 infected individuals (n=231,154) with associations among an  
45  
46 uninfected comparator sample (n=4,570,252); and 3) a dose-response analysis comparing low- or moderate-  
47  
48 intensity statin use to high-intensity use. In additional analyses, we investigated associations of individual  
49  
50 statins with 30-day outcomes after COVID-19 and evaluated the magnitude of the statin-mortality association  
51  
52 in strata of sex, age, race, BMI, clinical comorbidities, and C-reactive protein (CRP) level prior to diagnosis.  
53  
54  
55  
56

## METHODS

## Study setting and population

The Veterans Health Administration (VHA)—the largest integrated healthcare system in the United States—provides care to more than 7 million Veterans at 170 medical centers and 1,074 outpatient sites<sup>7</sup>. We used data from the Corporate Data Warehouse (CDW), a data repository derived from VHA's integrated electronic medical record, including a COVID-19 Shared Data Resource, which contains analytic variables for all enrollees tested for SARS-CoV-2<sup>8</sup>. The study was approved by the institutional review board at VA Puget Sound Health Care System. The requirement for informed consent was waived.

## Patient and public involvement

Patients or the public were not involved in the design, or conduct, or reporting, or dissemination plans of our research

## Selection of the SARS-CoV-2–positive cohort

We identified all enrollees with one or more positive nasal swabs for SARS-CoV-2 between March 1, 2020, and March 10, 2021. The index date was defined as the date the first positive test was performed. Most tests were performed in VA laboratories using US Food and Drug Administration (FDA)–approved RealTime (Abbott Laboratories) or Xpert-Xpress (Cepheid) SARS-CoV-2 assays. A small number were sent to outside laboratories.

## Selection of the SARS-CoV-2–negative cohort

Individuals without a positive nasal swab for SARS-CoV-2 and with any clinical lab test available in the medical record between March 1, 2020, and March 31, 2021, were chosen as a comparison group. A negative nasal swab for SARS-CoV-2 was not required for inclusion. Participants without a positive nasal swab for SARS-CoV-2 were assigned an index month during the study period for which they had a lab result, and a random index date during the index month which was used as the start of follow-up.

## Exposure

1 Current statin use was defined as receipt of a statin prescription with a fill date prior to the index date and a  
2 quantity prescribed that would extend past the index date. Statin intensity was defined as low, moderate, or  
3 high using definitions from the American Heart Association/American College of Cardiology guidelines on  
4 management of cholesterol<sup>9</sup> and was calculated based on the specific statin and dosage prescribed.  
5  
6

7 Prescribing data were available for the following specific statins: Atorvastatin, fluvastatin, lovastatin,  
8 pitavastatin, pravastatin, rosuvastatin, simvastatin. We defined prior statin use as receipt of a statin  
9 prescription with a fill date that included the time period six months prior to the index date.  
10  
11  
12  
13  
14  
15

## 16 **Covariates**

17 We collected data on age, sex, race/ethnicity, VHA facility location, and urban, rural, or highly rural residence  
18 using a validated classification scheme that has been previously described<sup>10</sup>. Body mass index (BMI) was  
19 defined as weight in kg divided by (height in meters)<sup>2</sup>. Smoking status was classified as current, former, or  
20 never based on VHA health factors data. If no smoking code was entered, the participant was classified as  
21 never smoked. At-risk drinking was defined using a score  $\geq 3$  for men and  $\geq 4$  for women on the Alcohol Use  
22 Disorders Identification Test consumption questions (AUDIT-C)<sup>11</sup>. Comorbidities (hypertension (HTN), CVD,  
23 and heart failure) were identified using ICD-9-CM and -10 codes entered after October 1, 1999, the date when  
24 VHA began using a universal electronic health record<sup>12</sup>. We defined chronic kidney disease (CKD) by  
25 categories of estimated glomerular filtration rate<sup>13</sup> using the most recent creatinine at least 3 days, but not  
26 more than 1 year, before the index date. For individuals with data available on CRP at least 14 days but not  
27 more than six months before the index date (n=27,630), we dichotomized CRP values as normal or elevated  
28 based on cut points provided for each assay at the testing site because a variety of assays for these  
29 biomarkers are used across the VA system.  
30  
31  
32  
33  
34  
35  
36  
37  
38  
39  
40  
41  
42  
43  
44  
45  
46  
47  
48

## 49 **Outcomes**

50 In both groups, we collected data on 30-day hospitalizations, ICU admissions, and deaths occurring through  
51 March 10, 2021. Deaths were verified by official sources including VHA Patient Treatment File, the Beneficiary  
52 Identification Records Locator Subsystem (BIRLS), and VA/CMS Medicare Vital Status File; Social Security  
53 Administration (SSA) Death Master File; death certificates, and VHA National Cemetery Administration<sup>14</sup>.  
54  
55  
56  
57  
58  
59  
60

## Statistical analyses

We summarized baseline characteristics for SARS-CoV-2 infected and uninfected participants, stratified by statin use at the index date. We used multiple imputation with 10 sets of imputations for analyses that included BMI or CKD due to approximately 20% missing values for each of these variables. We used DAGitty<sup>15</sup> to generate a directed acyclic graph (DAG) to assist in variable selection. We fit separate logistic regression models for individuals with and without a positive swab for SARS-CoV-2, testing the association of statin use at index date with occurrence of hospitalization, ICU admission, and death, adjusting for the minimal sufficient covariate set to estimate the total effect of statin use according to our DAG (statin use  $\geq$  six months prior to diagnosis, sex, age, race/ethnicity, BMI, tobacco use, facility location, index month, urban/rural status, eGFR, and history of diabetes, hypertension, cardiovascular disease, heart failure, and alcohol use disorder) separately. Index month was included as a precision variable. Facility location was included because both patterns of statin use and COVID-19 outcomes are expected to differ by region in the US. In combined models, we tested for the presence of multiplicative first-order interactions to determine whether the association between statins and odds of hospitalization, ICU admission, and death at 30 days differed between persons with and without a positive swab for SARS-CoV-2. We also controlled for prior statin use to approximate a comparison of incident users and non-users. In a sensitivity analysis, we examined associations of statin use at diagnosis with occurrence of hospitalization, ICU admission, and death in models that were not adjusted for statin use six months prior to diagnosis.

Among individuals with a positive swab for SARS-CoV-2, we fit logistic regression models examining associations of specific statins compared to no statin use with outcomes adjusted for sex, age, race/ethnicity, BMI, tobacco use, facility location, urban/rural status, eGFR, and history of diabetes, hypertension, cardiovascular disease, heart failure, and alcohol use disorder, as well as models comparing low-intensity to moderate- or high-intensity statin use. We evaluated the magnitude of the statin-mortality association in strata of sex, age, race, BMI, clinical comorbidities, and prior CRP concentration and tested for first-order multiplicative interactions by using interaction terms in combined models.



## Role of the funding source

The analysis was funded by VA Clinical Science Research & Development, which had no role in its design, conduct, analysis, or reporting.

## RESULTS

SARS-CoV-2 infected participants were 60.9 years old ( $\pm 16.5$ ) on average, and 10% percent ( $n = 23,974$ ) were female. Thirty percent (69,263) had an active statin prescription at enrollment. During the 30 days after diagnosis, 14% (32,490) of SARS-CoV-2 infected participants were hospitalized, 3% (6,140) were admitted to the ICU, and 5% (12,111) died. SARS-COV-2 uninfected participants were 61.6 years old ( $\pm 16.7$ ) on average, and 13% (577,718) were female. Thirty percent (1,389,364) had an active statin prescription at enrollment. During the 30 days after the index date, 2% (91,604) were hospitalized, 0.2% (9,298) were admitted to the ICU, and 0.4% died ( $n = 19,298$ ). Statin users were more likely to be of white race/ethnicity, have BMI of 30 kg/m<sup>2</sup> or greater, be former smokers, and reside in a rural zip code regardless of SARS-CoV-2 test result. Not surprisingly, statin use was higher among cardiometabolic conditions but lower in alcohol use disorder. A higher proportion of statin users were receiving hi potency therapy among participants testing positive for SARS-CoV-2 (**Table 1**).

Among SARS-COV-2 positive individuals, statin use was associated with lower odds of death at 30 days (OR 0.81 [95%CI 0.77–0.85]), but not with hospitalization or ICU admission. Adjustment for receipt of statin six months prior to baseline attenuated the magnitude of the association of statin use at diagnosis with all outcomes (**Fig. 1, Table 2b**) Associations with outcomes were similar for individual statins (**Table 3**). Compared to low-/moderate-intensity, high-intensity statin use was associated with higher odds of hospitalization (1.06 [95%CI 1.01–1.10]) but not with ICU admission or death (**Table 4**). Associations of statin use with hospitalization differed across strata of sex, age, race (Black vs. non-Black), and eGFR (e.g., OR for hospitalization in Black participants 0.98 [95%CI 0.92–1.03], OR for hospitalization in non-Black participants 0.92 [95%CI 0.89–0.95],  $p$  for interaction = 0.022). Associations of statin use with ICU admission differed across strata of sex and ethnicity (Latinx vs. not Latinx) (e.g., OR for ICU admission in Latinx participants 0.77 [95%CI 0.62–0.95], OR for ICU admission in non-Latinx participants 0.94 [95%CI 0.89–1.00],  $p$  for interaction

= 0.044). Associations of statin use with mortality differed across strata of age, race/ethnicity (white vs. non-white and Black vs. non-Black), and BMI (e.g., OR for mortality in Black participants 0.83 [95%CI 0.76–0.92], OR for mortality in non-Black participants 0.77 [95%CI 0.74–0.81], p for interaction = 0.006). Associations did not differ across strata of prevalent diabetes, hypertension, or CVD (**Supplementary Fig. 1–3**).

Compared to persons with SARS-CoV-2 infection, OR for all three outcomes were significantly lower in persons without SARS-CoV-2 infection, as reflected by  $p < 0.001$  for the interaction term of SARS-CoV-2\*statin use in all three models. Among SARS-COV-2 negative individuals, statin use was associated with lower odds of hospitalization (OR 0.79 [95%CI 0.77–0.80]), ICU admission (OR 0.86 [95%CI 0.81–0.90]), and death at 30 days (OR 0.60 [95%CI 0.58–0.62]). (**Table 2a**).

## DISCUSSION

In this cohort of U.S. Veterans with ( $n=231,154$ ) and without ( $n=4,570,252$ ) a positive respiratory swab for SARS-CoV-2, statin use was independently associated with lower odds of death at 30 days compared to no statin use, but this association over a similar time period was significantly stronger among Veterans without a positive respiratory swab for SARS-CoV-2. Among individuals with and without a positive respiratory swab for SARS-CoV-2, adjusting for prior statin use attenuated the association of statin use with all outcomes; however, in every case the magnitude of the association remained substantially greater among individuals without a diagnosis of COVID-19. Associations were similar for specific statins, and receipt of high-potency statin was not associated with lower odds of any outcome compared to moderate and low potency, except for a small difference in the odds of hospitalization. Associations were not significantly different in strata of prevalent diabetes, hypertension, or cardiovascular disease. Furthermore, the lack of a gradient of effect with statin potency also does not support a potential causal benefit of statin use. Taken together, these results suggest that while statin use is associated with lower mortality among individuals with a positive swab for SARS-CoV-2, the benefit is actually smaller for than it is for those without evidence of SARS-CoV-2 infection and does not support a possible anti-COVID effect of statin treatment. It is important to note, however, that the current study does not demonstrate a harmful effect of statin use among individuals with COVID-19, only that statins may not exert a SARS-CoV-2–specific protective effect and/or that positive findings in previous observational studies

1 may be due to residual confounding. Current findings therefore do not support statin cessation among  
2 individuals with COVID-19.  
3

4  
5  
6 Use of negative controls is an important technique to detect confounding or other sources of bias in  
7 epidemiological studies<sup>16</sup> that has gone underutilized in the era of COVID-19 research. An instructive example  
8 is the association of pneumonia or influenza vaccination with all-cause mortality seen in elderly individuals  
9 despite rigorous control for confounding by factors related to overall health status<sup>17</sup>. Using negative controls,  
10 Jackson et al. examined the association of vaccination with a negative control outcome: mortality prior to  
11 influenza season<sup>18</sup>. They found a stronger association with mortality during the period prior to influenza season  
12 compared to during or after, a biologically implausible result that was attributed by the authors to preferential  
13 receipt of vaccines by healthy individuals. This source of bias is now recognized in studies of this topic<sup>19</sup>. While  
14 the use of a negative control outcome is not precisely analogous to the methods used in the current study, the  
15 example can inform interpretation of the current findings.  
16  
17  
18  
19  
20  
21  
22  
23  
24  
25  
26  
27  
28  
29

30 Several recent systematic reviews and meta-analyses have examined the association of prior statin use with  
31 short-term outcomes after COVID-19<sup>20-25</sup>. Many of these reported an inverse association of statin use at  
32 diagnosis with mortality. For example, statin use was associated with a lower hazard of death (HR 0.72 [95%CI  
33 0.69–0.75]) in a large population-based study of English patients with diabetes independent of age and co-  
34 morbid CVD<sup>26</sup>. In a recent nationwide U.S. study of hospitalized individuals (n=10,541), outpatient statin, either  
35 alone or with blood pressure-lowering medications, was associated with lower odds of in-hospital death (OR  
36 0.59 [95%CI 0.50–0.69]). The magnitude of the association of statin use at diagnosis with mortality reported in  
37 these and other analyses is quite similar to the OR in the current report among individuals with COVID-19 in  
38 models that were not adjusted for prior statin use (OR for death at 30 days 0.78 [95% CI 0.75–0.82]), likely  
39 reflecting similar strategies for confounder adjustment. The lower COVID-19 mortality risk among statin users,  
40 however, is not a universal finding. In fact, among French hospitalized patients with diabetes, statin use at  
41 diagnosis was associated with higher odds of death at 28 days (OR 1.46 [95% CI 1.08–1.95])<sup>27</sup>. Reasons for  
42 these disparate findings are unclear but may be due in part to differences in timing, as early in the pandemic,  
43 treatments such as dexamethasone and remdesivir were not widely used. Consistent with this, in the French  
44  
45  
46  
47  
48  
49  
50  
51  
52  
53  
54  
55  
56  
57  
58  
59

1 cohort mortality was about 21% at 28 days, considerably higher than our overall 30-day mortality rate of about  
2 7%. No prior study to our knowledge has examined outcomes following statin use comparing SARS-CoV-2  
3 infected and uninfected statin users.  
4  
5  
6  
7

8 We noted several differences in outcomes associated with statin use by certain characteristics such as sex,  
9 age, and race (Supplementary Fig. 1-3). As our main analysis did not show evidence of a lower risk of  
10 outcomes associated with statin use confined to COVID-19 infected participants, these interactions likely  
11 reflect associations independent of presence of this infection and therefore reflecting effect modification  
12 between statin use, stratum variables, and outcomes of interest.  
13  
14  
15  
16  
17  
18  
19  
20

21 Our study has several strengths, most importantly a large, well characterized national sample. To our  
22 knowledge, this is the largest observational study of prior statin use and adverse outcomes from SARS-CoV-2  
23 in the United States (n=4,801,406) as well as the first to formally assess and compare statin effects seen in  
24 SARS-CoV-2 infection using a negative control (non-infected statin users). Second, we used several methods  
25 designed to mitigate or quantify bias due to unmeasured confounding. We: 1) constructed a DAG to estimate  
26 the minimal sufficient adjustment set to estimate the total effect of statin use on 30-day outcomes; 2) compared  
27 associations in SARS-CoV-2 infected individuals and an uninfected comparator sample; and 3) conducted  
28 dose-response analyses using statin potency to reflect dose. In addition, most VHA enrollees receive medical  
29 care and medications without cost, which likely decreases the contribution of unmeasured financial factors to  
30 differences in the quality of care received and most importantly to receipt of statin medications. Our results  
31 should be considered within the context of several limitations. The VHA population is generally older, with  
32 lower income and socioeconomic status<sup>28</sup> than the U.S. population as a whole, and our findings may not be  
33 generalizable to non-VHA populations. Additionally, the proportion of women was low (13%); however,  
34 although women comprised only a small proportion of the sample, the number of female participants  
35 (n=601,765) is adequate for robust statistical inference. We were also unable to capture hospitalizations or  
36 some outpatient prescriptions that occurred outside VHA. This is an important source of potential bias should  
37 propensity to seek outside care be associated with likelihood of receiving a statin, although VHA users are  
38 asked to provide notification within 72 hours of an outside hospital admission, and when possible are  
39  
40  
41  
42  
43  
44  
45  
46  
47  
48  
49  
50  
51  
52  
53  
54  
55  
56  
57  
58  
59

transferred to a VHA facility, which would then be captured in the VHA electronic health record. Given the timing of this study, we were unable to evaluate mediating or moderating effects of vaccination use due to very limited vaccination coverage of our population by the index date. No data were available on prescription adherence; however, statin discontinuation rates have previously shown to be low in VHA patients relative to discontinuation of other lipid-lowering medications<sup>29</sup>. The comparison of all-cause mortality is in our opinion the best outcome by which to assess whether statin use benefitted patients with versus without SARS-CoV-2 infection. The comparison of admission to hospital or ICU is of less value given that the reasons for hospitalization likely differed greatly by presence of infection, but, nevertheless, are of value in demonstrating that no apparent benefit is seen that might not be reflected in overall mortality. Finally, not all individuals in the comparator group were tested for SARS-CoV-2, so we were unable to exclude the possibility that some SARS-CoV-2–positive participants with asymptomatic or mild disease were misclassified as SARS-CoV-2–negative. We elected to include individuals without SARS-CoV-2 tests because individuals with indications for SARS-CoV-2 testing may represent a particular (and sicker) population than the general group of VA enrollees as a whole. Further, based on the current results, inclusion of individuals with undiagnosed COVID-19 in the SARS-CoV-2–negative comparator group would be expected to attenuate observed differences in the associations of statin use with adverse outcomes between the SARS-CoV-2 infected and negative comparator groups. It is unlikely that exclusion of participants with undiagnosed COVID-19 from the comparator group would have resulted in a reduction in the observed negative association between statin use and mortality, as this would have required an opposite association to be present between undiagnosed COVID-19 infection and mortality, a possibility for which there is little reason or evidence to support.

## CONCLUSIONS

In conclusion, statin use is associated with lower odds of 30-day mortality both among U.S. Veterans with or without a positive respiratory swab for SARS-CoV-2 indicating that statins may not exert COVID-19-specific beneficial effects.

**FUNDING.** The work was funded by VA Clinical Science Research & Development COVID19-8990-19

1  
2 **COMPETING INTERESTS.** There are no relevant conflicts of interest to disclose.  
3  
4  
5

6 **DATA AVAILABILITY.** Access to VA electronic health records data is limited to researchers with active, VA  
7 appointments and an IRB-approved protocol.  
8  
9

10  
11  
12 **CONTRIBUTORSHIP.** PLW conceived the project, designed the overall research plan, and wrote the first draft  
13 of the manuscript. EL analyzed the data and reviewed/edited the manuscript, LB contributed to the conception  
14 of the work and reviewed/edited the manuscript, LTP contributed to the conception of the work and  
15 reviewed/edited the manuscript, AK contributed to design/interpretation of the analyses and reviewed/edited  
16 the manuscript, AP contributed to the design/interpretation of the analyses and reviewed/edited the  
17 manuscript. SEK contributed to the conception of the work and reviewed/edited the manuscript. GD contributed  
18 to the design/interpretation of the analyses and reviewed/edited the manuscript. EJB conceived the project,  
19 designed the overall research plan, and reviewed/edited the manuscript.  
20  
21  
22  
23  
24  
25  
26  
27  
28  
29  
30

31  
32 **LICENCE.** The Corresponding Author has the right to grant on behalf of all authors and does grant on behalf of  
33 all authors, [a worldwide licence](#) to the Publishers and its licensees in perpetuity, in all forms, formats and  
34 media (whether known now or created in the future), to i) publish, reproduce, distribute, display and store the  
35 Contribution, ii) translate the Contribution into other languages, create adaptations, reprints, include within  
36 collections and create summaries, extracts and/or, abstracts of the Contribution, iii) create any other derivative  
37 work(s) based on the Contribution, iv) to exploit all subsidiary rights in the Contribution, v) the inclusion of  
38 electronic links from the Contribution to third party material where-ever it may be located; and, vi) licence any  
39 third party to do any or all of the above.  
40  
41  
42  
43  
44  
45  
46  
47  
48  
49  
50

51 **ETHICS STATEMENT.** The study was approved by the institutional review board at VA Puget Sound Health  
52 Care System, Seattle, WA, USA (#01897). The requirement for informed consent was waived.  
53  
54  
55  
56  
57  
58  
59  
60

## REFERENCES

1. Daniels LB, Ren J, Kumar K, et al. Relation of prior statin and anti-hypertensive use to severity of disease among patients hospitalized with COVID-19: Findings from the American Heart Association's COVID-19 Cardiovascular Disease Registry. *PloS one* 2021;16(7):e0254635. doi: 10.1371/journal.pone.0254635 [published Online First: 2021/07/16]
2. Pal R, Banerjee M, Yadav U, et al. Statin use and clinical outcomes in patients with COVID-19: An updated systematic review and meta-analysis. *Postgraduate medical journal* 2021 doi: 10.1136/postgradmedj-2020-139172 [published Online First: 2021/02/06]
3. Castiglione V, Chiriaco M, Emdin M, et al. Statin therapy in COVID-19 infection. *Eur Heart J Cardiovasc Pharmacother* 2020;6(4):258-59. doi: 10.1093/ehjcvp/pvaa042 [published Online First: 2020/04/30]
4. Butt JH, Gerds TA, Schou M, et al. Association between statin use and outcomes in patients with coronavirus disease 2019 (COVID-19): a nationwide cohort study. *BMJ Open* 2020;10(12):e044421. doi: 10.1136/bmjopen-2020-044421 [published Online First: 2020/12/06]
5. Yetmar ZA, Challener DW, Tleyjeh IM, et al. Association Between Chronic Statin Use and 30-Day Mortality in Hospitalized Patients With COVID-19. *Mayo Clin Proc Innov Qual Outcomes* 2021;5(2):442-46. doi: 10.1016/j.mayocpiqo.2021.02.002 [published Online First: 2021/03/23]
6. Rubin R. Could Statins Do More Than Lower Cholesterol in Patients With COVID-19? *JAMA : the journal of the American Medical Association* 2021 doi: 10.1001/jama.2021.8201 [published Online First: 2021/06/04]
7. U.S. Department of Veterans Affairs: VHA [Available from: <https://www.va.gov/health/> accessed 9/28/2020 2020.
8. CDW COVID-19 Shared Data Resource (intranet-only resource) [Available from: [https://vhacdwdwhweb100.vha.med.va.gov/phenotype/index.php/COVID-19:Shared\\_Data\\_Resource](https://vhacdwdwhweb100.vha.med.va.gov/phenotype/index.php/COVID-19:Shared_Data_Resource) accessed 9/28/2020 2020.
9. Grundy SM, Stone NJ, Bailey AL, et al. 2018 AHA/ACC/AACVPR/AAPA/ABC/ACPM/ADA/AGS/APhA/ASPC/NLA/PCNA Guideline on the Management of Blood Cholesterol: A Report of the American College of Cardiology/American Heart Association Task Force on Clinical Practice Guidelines. *Circulation* 2019;139(25):e1082-e143. doi: 10.1161/CIR.0000000000000625 [published Online First: 2018/12/28]
10. West AN, Lee RE, Shambaugh-Miller MD, et al. Defining "rural" for veterans' health care planning. *The Journal of rural health : official journal of the American Rural Health Association and the National Rural Health Care Association* 2010;26(4):301-9. doi: 10.1111/j.1748-0361.2010.00298.x [published Online First: 2010/10/30]
11. Bush K, Kivlahan DR, McDonnell MB, et al. The AUDIT alcohol consumption questions (AUDIT-C): an effective brief screening test for problem drinking. Ambulatory Care Quality Improvement Project (ACQUIP). Alcohol Use Disorders Identification Test. *Archives of internal medicine* 1998;158(16):1789-95. doi: 10.1001/archinte.158.16.1789 [published Online First: 1998/09/17]
12. Quan H, Sundararajan V, Halfon P, et al. Coding algorithms for defining comorbidities in ICD-9-CM and ICD-10 administrative data. *Medical care* 2005;43(11):1130-9. doi: 10.1097/01.mlr.0000182534.19832.83 [published Online First: 2005/10/15]
13. Young BA, Katz R, Boulware LE, et al. Risk Factors for Rapid Kidney Function Decline Among African Americans: The Jackson Heart Study (JHS). *American journal of kidney diseases : the official journal of the National Kidney Foundation* 2016;68(2):229-39. doi: 10.1053/j.ajkd.2016.02.046 [published Online First: 2016/04/14]
14. Sohn MW, Arnold N, Maynard C, et al. Accuracy and completeness of mortality data in the Department of Veterans Affairs. *Popul Health Metr* 2006;4:2. doi: 10.1186/1478-7954-4-2 [published Online First: 2006/04/12]
15. Textor J, van der Zander B, Gilthorpe MS, et al. Robust causal inference using directed acyclic graphs: the R package 'dagitty'. *International journal of epidemiology* 2016;45(6):1887-94. doi: 10.1093/ije/dyw341 [published Online First: 2017/01/17]
16. Lipsitch M, Tchetgen Tchetgen E, Cohen T. Negative controls: a tool for detecting confounding and bias in observational studies. *Epidemiology* 2010;21(3):383-8. doi: 10.1097/EDE.0b013e3181d61eeb [published Online First: 2010/03/26]

17. Rivetti D, Jefferson T, Thomas R, et al. Vaccines for preventing influenza in the elderly. *Cochrane Database Syst Rev* 2006(3):CD004876. doi: 10.1002/14651858.CD004876.pub2 [published Online First: 2006/07/21]
18. Jackson LA, Jackson ML, Nelson JC, et al. Evidence of bias in estimates of influenza vaccine effectiveness in seniors. *International journal of epidemiology* 2006;35(2):337-44. doi: 10.1093/ije/dyi274 [published Online First: 2005/12/22]
19. Levett-Jones T. Vaccines for preventing influenza in the elderly: A Cochrane review summary. *International journal of nursing studies* 2020;109:103372. doi: 10.1016/j.ijnurstu.2019.06.003 [published Online First: 2019/06/23]
20. Hariyanto TI, Kurniawan A. Statin and outcomes of coronavirus disease 2019 (COVID-19): A systematic review, meta-analysis, and meta-regression. *Nutrition, metabolism, and cardiovascular diseases : NMCD* 2021;31(6):1662-70. doi: 10.1016/j.numecd.2021.02.020 [published Online First: 2021/04/12]
21. Permana H, Huang I, Purwiga A, et al. In-hospital use of statins is associated with a reduced risk of mortality in coronavirus-2019 (COVID-19): systematic review and meta-analysis. *Pharmacol Rep* 2021;73(3):769-80. doi: 10.1007/s43440-021-00233-3 [published Online First: 2021/02/21]
22. Hariyanto TI, Kurniawan A. Statin therapy did not improve the in-hospital outcome of coronavirus disease 2019 (COVID-19) infection. *Diabetes Metab Syndr* 2020;14(6):1613-15. doi: 10.1016/j.dsx.2020.08.023 [published Online First: 2020/09/04]
23. Wu KS, Lin PC, Chen YS, et al. The use of statins was associated with reduced COVID-19 mortality: a systematic review and meta-analysis. *Annals of medicine* 2021;53(1):874-84. doi: 10.1080/07853890.2021.1933165 [published Online First: 2021/06/08]
24. Vahedian-Azimi A, Mohammadi SM, Heidari Beni F, et al. Improved COVID-19 ICU admission and mortality outcomes following treatment with statins: a systematic review and meta-analysis. *Arch Med Sci* 2021;17(3):579-95. doi: 10.5114/aoms/132950 [published Online First: 2021/05/25]
25. Onorato D, Pucci M, Carpena G, et al. Protective Effects of Statins Administration in European and North American Patients Infected with COVID-19: A Meta-Analysis. *Semin Thromb Hemost* 2021;47(4):392-99. doi: 10.1055/s-0040-1722307 [published Online First: 2021/01/23]
26. Holman N, Knighton P, Kar P, et al. Risk factors for COVID-19-related mortality in people with type 1 and type 2 diabetes in England: a population-based cohort study. *Lancet Diabetes Endocrinol* 2020;8(10):823-33. doi: 10.1016/S2213-8587(20)30271-0 [published Online First: 2020/08/18]
27. Cariou B, Goronflot T, Rimbert A, et al. Routine use of statins and increased mortality related to COVID-19 in inpatients with type 2 diabetes: Results from the CORONADO study. *Diabetes & metabolism* 2020 doi: 10.1016/j.diabet.2020.10.001 [published Online First: 2020/10/23]
28. Kondo K, Low A, Everson T, et al. Health Disparities in Veterans: A Map of the Evidence. *Medical care* 2017;55 Suppl 9 Suppl 2:S9-S15. doi: 10.1097/MLR.0000000000000756 [published Online First: 2017/08/15]
29. Hiatt JG, Shamsie SG, Schectman G. Discontinuation rates of cholesterol-lowering medications: implications for primary care. *The American journal of managed care* 1999;5(4):437-44. [published Online First: 1999/07/01]



**Table 1.** Characteristics of VHA Veterans with and without a positive respiratory swab for SARS-CoV-2 (March 1, 2020–March 10, 2021), stratified by presence of an active statin prescription at enrollment

|                                                                  | Overall     |       | No positive respiratory swab for SARS-CoV-2 |       |                                           |       | ≥1 positive respiratory swab for SARS-CoV-2 |       |                                        |       |
|------------------------------------------------------------------|-------------|-------|---------------------------------------------|-------|-------------------------------------------|-------|---------------------------------------------|-------|----------------------------------------|-------|
|                                                                  | n=4,801,406 |       | No statin prescription<br>n=3,180,888       |       | Active statin prescription<br>n=1,389,364 |       | No statin prescription<br>n=161,891         |       | Active statin prescription<br>n=69,263 |       |
| Age, years                                                       | 61.6        | ±16.7 | 58.3                                        | ±17.7 | 69.3                                      | ±10.8 | 57.8                                        | ±17.5 | 68.0                                   | ±11.4 |
| Age category, years                                              |             |       |                                             |       |                                           |       |                                             |       |                                        |       |
| 19-39                                                            | 661,777     | 14%   | 613,885                                     | 19%   | 15,272                                    | 1%    | 31,645                                      | 20%   | 975                                    | 1%    |
| 40-49                                                            | 482,871     | 10%   | 402,201                                     | 13%   | 54,467                                    | 4%    | 22,718                                      | 14%   | 3,485                                  | 5%    |
| 50-59                                                            | 728,340     | 15%   | 516,328                                     | 16%   | 172,006                                   | 12%   | 29,099                                      | 18%   | 10,907                                 | 16%   |
| 60-69                                                            | 993,105     | 21%   | 600,530                                     | 19%   | 346,361                                   | 25%   | 28,785                                      | 18%   | 17,429                                 | 25%   |
| 70-79                                                            | 1,408,065   | 29%   | 735,949                                     | 23%   | 610,855                                   | 44%   | 33,303                                      | 21%   | 27,958                                 | 40%   |
| 80+                                                              | 525,548     | 11%   | 311,010                                     | 10%   | 189,825                                   | 14%   | 16,204                                      | 10%   | 8,509                                  | 12%   |
| Sex at birth, female                                             | 601,692     | 13%   | 509,443                                     | 16%   | 68,275                                    | 5%    | 20,598                                      | 13%   | 3,376                                  | 5%    |
| Race/ethnicity                                                   |             |       |                                             |       |                                           |       |                                             |       |                                        |       |
| White                                                            | 3,335,105   | 69%   | 2,122,989                                   | 67%   | 1,055,742                                 | 76%   | 106,448                                     | 66%   | 49,926                                 | 72%   |
| Black                                                            | 860,829     | 18%   | 582,091                                     | 18%   | 226,384                                   | 16%   | 38,080                                      | 24%   | 14,274                                 | 21%   |
| Hispanic                                                         | 333,593     | 7%    | 230,848                                     | 7%    | 79,866                                    | 6%    | 17,770                                      | 11%   | 5,109                                  | 7%    |
| Other                                                            | 542,562     | 11%   | 430,377                                     | 14%   | 94,575                                    | 7%    | 13,410                                      | 8%    | 4,200                                  | 6%    |
| Body-mass index, kg/m <sup>2</sup>                               | 30.2        | ±6.09 | 29.8                                        | ±6.04 | 30.8                                      | ±6.06 | 30.9                                        | ±6.35 | 31.9                                   | ±6.26 |
| Body-mass index category, kg/m <sup>2</sup>                      |             |       |                                             |       |                                           |       |                                             |       |                                        |       |
| <18.5                                                            | 28,116      | 1%    | 20,717                                      | 1%    | 6,230                                     | 1%    | 951                                         | 1%    | 218                                    | 0%    |
| 18.5-24.9                                                        | 553,988     | 17%   | 379,204                                     | 20%   | 152,657                                   | 14%   | 16,249                                      | 15%   | 5,878                                  | 11%   |
| 25-29.9                                                          | 1,107,238   | 35%   | 687,781                                     | 36%   | 367,799                                   | 34%   | 34,949                                      | 32%   | 16,709                                 | 30%   |
| 30-34.9                                                          | 869,628     | 27%   | 507,893                                     | 26%   | 313,277                                   | 29%   | 30,944                                      | 29%   | 17,514                                 | 32%   |
| 35-39.9                                                          | 399,754     | 13%   | 224,651                                     | 12%   | 149,833                                   | 14%   | 15,734                                      | 15%   | 9,536                                  | 17%   |
| ≥ 40                                                             | 208,950     | 7%    | 113,491                                     | 6%    | 80,708                                    | 8%    | 9,077                                       | 8%    | 5,674                                  | 10%   |
| Active statin prescription six months prior to enrollment        | 1,375,009   | 29%   | 259,070                                     | 8%    | 1,046,850                                 | 75%   | 17,020                                      | 11%   | 52,069                                 | 75%   |
| Never                                                            | 1,747,387   | 36%   | 1,338,452                                   | 42%   | 328,440                                   | 24%   | 62,782                                      | 39%   | 17,713                                 | 26%   |
| Former                                                           | 1,729,275   | 36%   | 984,318                                     | 31%   | 651,438                                   | 47%   | 58,321                                      | 36%   | 35,198                                 | 51%   |
| Current                                                          | 1,323,044   | 28%   | 857,133                                     | 27%   | 408,908                                   | 29%   | 40,651                                      | 25%   | 16,352                                 | 24%   |
| Urban/rural/highly rural ZIP code                                |             |       |                                             |       |                                           |       |                                             |       |                                        |       |
| Highly rural                                                     | 57,047      | 1%    | 34,211                                      | 1%    | 20,620                                    | 1%    | 1,360                                       | 1%    | 856                                    | 1%    |
| Rural                                                            | 1,561,076   | 33%   | 975,607                                     | 31%   | 518,394                                   | 37%   | 43,690                                      | 27%   | 23,385                                 | 34%   |
| Urban                                                            | 3,172,176   | 66%   | 2,163,063                                   | 68%   | 847,474                                   | 61%   | 116,643                                     | 72%   | 44,996                                 | 65%   |
| Unknown                                                          | 9,407       | 0%    | 7,022                                       | 0%    | 2,298                                     | 0%    | 61                                          | 0%    | 26                                     | 0%    |
| Estimated glomerular filtration rate, ml/min/1.73 m <sup>2</sup> |             |       |                                             |       |                                           |       |                                             |       |                                        |       |
| ≥ 90                                                             | 938,310     | 27%   | 654,399                                     | 31%   | 235,893                                   | 20%   | 36,230                                      | 32%   | 11,788                                 | 19%   |
| 60-89                                                            | 1,718,393   | 49%   | 1,034,287                                   | 49%   | 599,357                                   | 50%   | 54,598                                      | 48%   | 30,151                                 | 48%   |
| 45-59                                                            | 520,635     | 15%   | 268,392                                     | 13%   | 226,556                                   | 19%   | 13,799                                      | 12%   | 11,888                                 | 19%   |
| 30-44                                                            | 212,116     | 6%    | 100,776                                     | 5%    | 100,175                                   | 8%    | 5,626                                       | 5%    | 5,539                                  | 9%    |
| 15-29                                                            | 58,464      | 2%    | 27,223                                      | 1%    | 27,527                                    | 2%    | 1,906                                       | 2%    | 1,808                                  | 3%    |
| <15 or dialysis                                                  | 25,765      | 1%    | 12,803                                      | 1%    | 10,449                                    | 1%    | 1,503                                       | 1%    | 1,010                                  | 2%    |

**Table 1 CONTINUED.** Characteristics of VHA Veterans with and without a positive respiratory swab for SARS-CoV-2 (March 1, 2020–March 10, 2021), stratified by presence of an active statin prescription at enrollment

|                                                     |           |       |           |       |           |       |         |       |        |       |
|-----------------------------------------------------|-----------|-------|-----------|-------|-----------|-------|---------|-------|--------|-------|
| Diabetes                                            | 1,482,197 | 31%   | 679,909   | 21%   | 716,920   | 52%   | 44,364  | 27%   | 41,004 | 59%   |
| Hypertension                                        | 2,874,378 | 60%   | 1,551,529 | 49%   | 1,176,398 | 85%   | 86,382  | 53%   | 60,069 | 87%   |
| Cardiovascular disease                              | 1,749,197 | 36%   | 857,912   | 27%   | 794,940   | 57%   | 53,635  | 33%   | 42,710 | 62%   |
| Heart failure                                       | 352,710   | 7%    | 144,971   | 5%    | 183,128   | 13%   | 12,388  | 8%    | 12,223 | 18%   |
| Alcohol use disorder                                | 909,010   | 19%   | 629,005   | 20%   | 238,333   | 17%   | 31,212  | 19%   | 10,460 | 15%   |
| Statin prescribed                                   |           |       |           |       |           |       |         |       |        |       |
| None                                                | 3,341,657 | 70%   | 3,179,903 | 100%  | 0         | 0%    | 161,754 | 100%  | 0      | 0%    |
| Atorvastatin                                        | 872,981   | 18%   |           |       | 829,795   | 60%   |         |       | 43,186 | 62%   |
| Fluvastatin                                         | 364       | <1%   |           |       | 348       | 0%    |         |       | 16     | 0%    |
| Lovastatin                                          | 15,375    | <1%   |           |       | 14,751    | 1%    |         |       | 624    | 1%    |
| Pitavastatin                                        | 801       | <1%   |           |       | 748       | <1%   |         |       | 53     | <1%   |
| Pravastatin                                         | 123,779   | 3%    |           |       | 118,039   | 8%    |         |       | 5,740  | 8%    |
| Rosuvastatin                                        | 173,943   | 4%    |           |       | 165,066   | 12%   |         |       | 8,877  | 13%   |
| Simvastatin                                         | 270,806   | 6%    |           |       | 260,039   | 19%   |         |       | 10,767 | 16%   |
| High-potency statin (vs. low- or moderate-potency)* | 616,824   | 42%   | 0         | <1%   | 585,224   | 42%   | 0       | <1%   | 31,600 | 46%   |
| Mean hsCRP in the prior six months, mg/L**          | 17.3      | ±136  | 16.4      | ±151  | 18.2      | ±120  | 19.9    | ±49.6 | 21.0   | ±52.9 |
| hsCRP in the prior six months ≥2 mg/L**             | 390,796   | 41%   | 217,408   | 40%   | 145,787   | 42%   | 17,407  | 44%   | 10,194 | 45%   |
| Mean hsCRP at or after the index date, mg/L***      | 29.3      | ±54.1 | 22.2      | ±46.6 | 25.6      | ±50.8 | 57.8    | ±70.8 | 65.2   | ±71.1 |
| hsCRP at or after the index date ≤2 mg/L***         | 125,178   | 52%   | 61,501    | 46%   | 34,630    | 49%   | 18,260  | 75%   | 10,787 | 79%   |
| <b>OUTCOMES</b>                                     |           |       |           |       |           |       |         |       |        |       |
| Hospital admission within 30 days                   | 124,094   | 3%    | 61,651    | 2%    | 29,953    | 2%    | 20,280  | 13%   | 12,210 | 18%   |
| ICU admission within 30 days                        | 15,438    | <1%   | 5,710     | <1%   | 3,588     | <1%   | 3,754   | 2%    | 2,386  | 3%    |
| Death w/in 30 days                                  | 31,409    | 1%    | 13,074    | <1%   | 6,224     | <1%   | 7,815   | 5%    | 4,296  | 6%    |

Data are presented as mean ± standard deviation (SD) for continuous variables and n (%) for categorical variables

p-values for global differences in participant characteristics across categories of COVID diagnosis and prior statin use all <0.001

\* based on estimated % LDL-c reduction

\*\* up to 14 days prior to index date (Overall n=958,343)

\*\*\* Overall n=224,930

**Table 2a.** Odds ratios from logistic regression models testing the association of active statin prescription at enrollment with adverse 30-day outcomes among VHA Veterans with and without a positive respiratory swab for SARS-CoV-2, including adjustment for prior statin use

|                                                                  | No positive swab, n=4,568,689 |       |        |               |       |        |       |       |        | ≥1 positive swab, n=231,017 |       |        |               |       |        |       |       |         |
|------------------------------------------------------------------|-------------------------------|-------|--------|---------------|-------|--------|-------|-------|--------|-----------------------------|-------|--------|---------------|-------|--------|-------|-------|---------|
|                                                                  | Hospital admission            |       |        | ICU admission |       |        | Death |       |        | Hospital admission          |       |        | ICU admission |       |        | Death |       |         |
|                                                                  | OR                            | 95%CI |        | OR            | 95%CI |        | OR    | 95%CI |        | OR                          | 95%CI |        | OR            | 95%CI |        | OR    | 95%CI |         |
| Active statin prescription at enrollment                         | 0.79                          | 0.77  | — 0.80 | 0.98          | 0.95  | — 1.01 | 0.86  | 0.81  | — 0.90 | 0.94                        | 0.88  | — 1.01 | 0.60          | 0.58  | — 0.62 | 0.81  | 0.77  | — 0.85  |
| Statin prescription six months prior to enrollment               | 0.91                          | 0.89  | — 0.93 | 0.93          | 0.90  | — 0.96 | 0.88  | 0.83  | — 0.93 | 0.97                        | 0.91  | — 1.04 | 0.93          | 0.90  | — 0.97 | 0.94  | 0.89  | — 0.99  |
| Sex at birth, female                                             | 0.73                          | 0.71  | — 0.75 | 0.75          | 0.71  | — 0.79 | 0.73  | 0.67  | — 0.80 | 0.74                        | 0.65  | — 0.84 | 0.63          | 0.58  | — 0.69 | 0.56  | 0.50  | — 0.64  |
| Age category, years                                              |                               |       |        |               |       |        |       |       |        |                             |       |        |               |       |        |       |       |         |
| 19-39                                                            | 1.16                          | 1.12  | — 1.19 | 0.61          | 0.57  | — 0.65 | 0.61  | 0.54  | — 0.69 | 0.60                        | 0.51  | — 0.71 | 0.26          | 0.22  | — 0.30 | 0.15  | 0.11  | — 0.21  |
| 40-49                                                            | 0.97                          | 0.94  | — 1.01 | 0.75          | 0.70  | — 0.80 | 0.81  | 0.73  | — 0.91 | 0.68                        | 0.59  | — 0.79 | 0.46          | 0.40  | — 0.54 | 0.38  | 0.30  | — 0.48  |
| 50-59                                                            | ref                           | ref   | ref    | ref           | ref   | ref    | ref   | ref   | ref    | ref                         | ref   | ref    | ref           | ref   | ref    | ref   | ref   | ref     |
| 60-69                                                            | 1.01                          | 0.99  | — 1.03 | 1.29          | 1.23  | — 1.34 | 1.16  | 1.08  | — 1.25 | 1.32                        | 1.21  | — 1.46 | 1.95          | 1.81  | — 2.10 | 2.86  | 2.55  | — 3.20  |
| 70-79                                                            | 0.81                          | 0.79  | — 0.83 | 1.43          | 1.37  | — 1.49 | 1.00  | 0.92  | — 1.08 | 1.49                        | 1.36  | — 1.64 | 2.60          | 2.41  | — 2.79 | 5.93  | 5.32  | — 6.61  |
| ≥80                                                              | 0.96                          | 0.93  | — 0.99 | 1.81          | 1.71  | — 1.91 | 0.95  | 0.87  | — 1.04 | 1.62                        | 1.45  | — 1.82 | 5.06          | 4.68  | — 5.46 | 13.86 | 12.37 | — 15.53 |
| White (vs not white)                                             | 1.21                          | 1.14  | — 1.28 | 0.88          | 0.81  | — 0.97 | 1.23  | 1.02  | — 1.49 | 0.74                        | 0.61  | — 0.91 | 1.10          | 0.95  | — 1.27 | 0.87  | 0.74  | — 1.04  |
| Black vs( not Black)                                             | 1.49                          | 1.40  | — 1.58 | 1.36          | 1.24  | — 1.50 | 1.53  | 1.26  | — 1.85 | 1.10                        | 0.89  | — 1.35 | 1.05          | 0.90  | — 1.22 | 0.78  | 0.66  | — 0.94  |
| Hispanic (vs not Hispanic)                                       | 1.07                          | 1.04  | — 1.10 | 1.16          | 1.10  | — 1.22 | 1.23  | 1.13  | — 1.35 | 1.03                        | 0.92  | — 1.15 | 1.07          | 0.99  | — 1.14 | 1.13  | 1.04  | — 1.24  |
| Body-mass index category, kg/m <sup>2</sup>                      |                               |       |        |               |       |        |       |       |        |                             |       |        |               |       |        |       |       |         |
| <18.5                                                            | 1.35                          | 1.29  | — 1.42 | 1.14          | 1.01  | — 1.29 | 1.51  | 1.31  | — 1.73 | 1.35                        | 1.06  | — 1.72 | 2.48          | 2.33  | — 2.65 | 1.81  | 1.59  | — 2.07  |
| 18.5-24.9                                                        | ref                           | ref   | ref    | ref           | ref   | ref    | ref   | ref   | ref    | ref                         | ref   | ref    | ref           | ref   | ref    | ref   | ref   | ref     |
| 25-29.9                                                          | 0.75                          | 0.73  | — 0.76 | 0.81          | 0.78  | — 0.85 | 0.70  | 0.65  | — 0.74 | 0.89                        | 0.82  | — 0.97 | 0.54          | 0.52  | — 0.56 | 0.73  | 0.68  | — 0.79  |
| 30-34.9                                                          | 0.67                          | 0.65  | — 0.68 | 0.76          | 0.73  | — 0.80 | 0.62  | 0.57  | — 0.66 | 0.88                        | 0.81  | — 0.96 | 0.42          | 0.40  | — 0.44 | 0.69  | 0.64  | — 0.74  |
| 35-39.9                                                          | 0.63                          | 0.61  | — 0.65 | 0.76          | 0.72  | — 0.80 | 0.57  | 0.52  | — 0.62 | 0.85                        | 0.76  | — 0.94 | 0.37          | 0.35  | — 0.40 | 0.64  | 0.59  | — 0.70  |
| ≥40                                                              | 0.65                          | 0.63  | — 0.67 | 0.87          | 0.82  | — 0.93 | 0.59  | 0.53  | — 0.65 | 1.03                        | 0.91  | — 1.16 | 0.43          | 0.39  | — 0.46 | 0.80  | 0.72  | — 0.88  |
| Tobacco use                                                      |                               |       |        |               |       |        |       |       |        |                             |       |        |               |       |        |       |       |         |
| Never                                                            | ref                           | ref   | ref    | ref           | ref   | ref    | ref   | ref   | ref    | ref                         | ref   | ref    | ref           | ref   | ref    | ref   | ref   | ref     |
| Former                                                           | 1.25                          | 1.23  | — 1.28 | 1.11          | 1.08  | — 1.15 | 1.12  | 1.06  | — 1.19 | 1.10                        | 1.02  | — 1.17 | 1.09          | 1.04  | — 1.13 | 1.18  | 1.12  | — 1.24  |
| Current                                                          | 2.02                          | 1.98  | — 2.06 | 1.39          | 1.35  | — 1.44 | 1.76  | 1.66  | — 1.87 | 1.29                        | 1.20  | — 1.39 | 1.67          | 1.60  | — 1.74 | 1.24  | 1.17  | — 1.32  |
| Urban/rural/highly rural residence                               |                               |       |        |               |       |        |       |       |        |                             |       |        |               |       |        |       |       |         |
| Highly rural                                                     | 0.68                          | 0.64  | — 0.73 | 0.58          | 0.50  | — 0.66 | 0.98  | 0.82  | — 1.18 | 0.74                        | 0.54  | — 1.00 | 0.92          | 0.81  | — 1.05 | 1.16  | 0.98  | — 1.38  |
| Rural                                                            | 0.74                          | 0.73  | — 0.75 | 0.70          | 0.68  | — 0.72 | 0.74  | 0.70  | — 0.78 | 0.88                        | 0.82  | — 0.93 | 0.89          | 0.87  | — 0.92 | 1.03  | 0.99  | — 1.08  |
| Urban                                                            | ref                           | ref   | ref    | ref           | ref   | ref    | ref   | ref   | ref    | ref                         | ref   | ref    | ref           | ref   | ref    | ref   | ref   | ref     |
| Unknown                                                          | 0.25                          | 0.18  | — 0.35 | 0.27          | 0.10  | — 0.75 | 0.35  | 0.13  | — 0.94 | 0.55                        | 0.08  | — 3.99 | 0.80          | 0.51  | — 1.25 | 1.77  | 0.73  | — 4.30  |
| Diabetes                                                         | 1.18                          | 1.16  | — 1.20 | 1.30          | 1.27  | — 1.34 | 1.26  | 1.21  | — 1.32 | 1.26                        | 1.19  | — 1.34 | 1.41          | 1.36  | — 1.45 | 1.37  | 1.31  | — 1.43  |
| Hypertension                                                     | 1.22                          | 1.19  | — 1.24 | 1.30          | 1.25  | — 1.35 | 1.30  | 1.22  | — 1.39 | 1.29                        | 1.19  | — 1.41 | 1.09          | 1.04  | — 1.14 | 0.96  | 0.90  | — 1.02  |
| Cardiovascular disease                                           | 2.04                          | 2.01  | — 2.08 | 1.84          | 1.79  | — 1.90 | 2.69  | 2.55  | — 2.84 | 2.08                        | 1.95  | — 2.23 | 1.88          | 1.81  | — 1.95 | 1.24  | 1.18  | — 1.30  |
| Heart failure                                                    | 2.13                          | 2.09  | — 2.16 | 1.64          | 1.59  | — 1.70 | 2.34  | 2.22  | — 2.46 | 1.53                        | 1.43  | — 1.63 | 2.51          | 2.42  | — 2.59 | 1.31  | 1.25  | — 1.38  |
| Alcohol use disorder                                             | 1.12                          | 1.10  | — 1.14 | 0.75          | 0.72  | — 0.78 | 1.03  | 0.97  | — 1.09 | 0.86                        | 0.79  | — 0.93 | 0.78          | 0.75  | — 0.82 | 0.68  | 0.64  | — 0.73  |
| Estimated glomerular filtration rate, ml/min/1.73 m <sup>2</sup> |                               |       |        |               |       |        |       |       |        |                             |       |        |               |       |        |       |       |         |
| ≥ 90                                                             | ref                           | ref   | ref    | ref           | ref   | ref    | ref   | ref   | ref    | ref                         | ref   | ref    | ref           | ref   | ref    | ref   | ref   | ref     |
| 60-89                                                            | 0.80                          | 0.79  | — 0.82 | 0.90          | 0.87  | — 0.93 | 0.80  | 0.76  | — 0.85 | 0.96                        | 0.88  | — 1.04 | 0.60          | 0.57  | — 0.62 | 1.10  | 1.02  | — 1.18  |
| 45-59                                                            | 0.84                          | 0.81  | — 0.86 | 0.99          | 0.94  | — 1.03 | 0.84  | 0.78  | — 0.91 | 1.00                        | 0.91  | — 1.10 | 0.71          | 0.67  | — 0.74 | 1.44  | 1.33  | — 1.56  |
| 30-44                                                            | 0.93                          | 0.90  | — 0.96 | 1.10          | 1.04  | — 1.16 | 0.92  | 0.84  | — 1.01 | 1.14                        | 1.02  | — 1.29 | 0.99          | 0.93  | — 1.05 | 1.83  | 1.68  | — 1.99  |
| 15-29                                                            | 1.15                          | 1.10  | — 1.20 | 1.31          | 1.21  | — 1.42 | 1.14  | 1.01  | — 1.29 | 1.32                        | 1.14  | — 1.53 | 2.07          | 1.94  | — 2.21 | 2.65  | 2.36  | — 2.97  |
| <15 or dialysis                                                  | 1.60                          | 1.52  | — 1.69 | 1.46          | 1.33  | — 1.60 | 1.77  | 1.56  | — 2.00 | 1.51                        | 1.29  | — 1.77 | 3.07          | 2.85  | — 3.32 | 2.48  | 2.16  | — 2.85  |

Models additionally adjusted for index month and geographic location by Veterans Integrated Service Network location

For peer review only - <http://bmjopen.bmj.com/site/about/guidelines.xhtml>

**Table 2b.** Odds ratios from logistic regression models testing the association of active statin prescription at enrollment with adverse 30-day outcomes among VHA Veterans with and without a positive respiratory swab for SARS-CoV-2, without adjustment for prior statin use

|                                                                  | No positive swab, n=4,568,689 |       |   |               |       |      |       |       |      | ≥1 positive swab, n=231,017 |       |      |               |       |   |       |       |      |   |      |       |       |   |       |  |
|------------------------------------------------------------------|-------------------------------|-------|---|---------------|-------|------|-------|-------|------|-----------------------------|-------|------|---------------|-------|---|-------|-------|------|---|------|-------|-------|---|-------|--|
|                                                                  | Hospital admission            |       |   | ICU admission |       |      | Death |       |      | Hospital admission          |       |      | ICU admission |       |   | Death |       |      |   |      |       |       |   |       |  |
|                                                                  | OR                            | 95%CI |   | OR            | 95%CI |      | OR    | 95%CI |      | OR                          | 95%CI |      | OR            | 95%CI |   | OR    | 95%CI |      |   |      |       |       |   |       |  |
| Active statin prescription at enrollment                         | 0.75                          | 0.74  | — | 0.76          | 0.80  | 0.76 | —     | 0.83  | 0.58 | 0.56                        | —     | 0.59 | 0.94          | 0.91  | — | 0.96  | 0.93  | 0.88 | — | 0.98 | 0.78  | 0.75  | — | 0.82  |  |
| Sex at birth, female                                             | 0.73                          | 0.71  | — | 0.75          | 0.73  | 0.67 | —     | 0.81  | 0.63 | 0.58                        | —     | 0.69 | 0.75          | 0.71  | — | 0.79  | 0.74  | 0.65 | — | 0.84 | 0.57  | 0.50  | — | 0.65  |  |
| Age category, years                                              |                               |       |   |               |       |      |       |       |      |                             |       |      |               |       |   |       |       |      |   |      |       |       |   |       |  |
| 19-39                                                            | 1.16                          | 1.13  | — | 1.20          | 0.61  | 0.54 | —     | 0.69  | 0.26 | 0.22                        | —     | 0.30 | 0.61          | 0.58  | — | 0.66  | 0.60  | 0.51 | — | 0.71 | 0.15  | 0.11  | — | 0.21  |  |
| 40-49                                                            | 0.98                          | 0.95  | — | 1.01          | 0.82  | 0.73 | —     | 0.92  | 0.47 | 0.40                        | —     | 0.54 | 0.75          | 0.71  | — | 0.80  | 0.68  | 0.59 | — | 0.79 | 0.38  | 0.30  | — | 0.48  |  |
| 50-59                                                            | ref                           | ref   | — | ref           | ref   | ref  | —     | ref   | ref  | ref                         | —     | ref  | ref           | ref   | — | ref   | ref   | ref  | — | ref  | ref   | ref   | — | ref   |  |
| 60-69                                                            | 1.01                          | 0.98  | — | 1.03          | 1.16  | 1.08 | —     | 1.25  | 1.95 | 1.81                        | —     | 2.10 | 1.28          | 1.23  | — | 1.34  | 1.32  | 1.21 | — | 1.45 | 2.86  | 2.55  | — | 3.20  |  |
| 70-79                                                            | 0.81                          | 0.79  | — | 0.83          | 0.99  | 0.92 | —     | 1.07  | 2.59 | 2.41                        | —     | 2.78 | 1.43          | 1.36  | — | 1.49  | 1.49  | 1.36 | — | 1.64 | 5.92  | 5.31  | — | 6.60  |  |
| ≥80                                                              | 0.96                          | 0.93  | — | 0.99          | 0.95  | 0.87 | —     | 1.04  | 5.06 | 4.68                        | —     | 5.46 | 1.81          | 1.71  | — | 1.91  | 1.62  | 1.45 | — | 1.82 | 13.86 | 12.37 | — | 15.53 |  |
| White (vs not white)                                             | 1.20                          | 1.14  | — | 1.28          | 1.23  | 1.02 | —     | 1.49  | 1.10 | 0.95                        | —     | 1.27 | 0.88          | 0.81  | — | 0.97  | 0.75  | 0.61 | — | 0.91 | 0.87  | 0.74  | — | 1.04  |  |
| Black vs (not Black)                                             | 1.49                          | 1.40  | — | 1.58          | 1.53  | 1.26 | —     | 1.86  | 1.05 | 0.90                        | —     | 1.22 | 1.37          | 1.24  | — | 1.50  | 1.10  | 0.89 | — | 1.35 | 0.78  | 0.66  | — | 0.94  |  |
| Hispanic (vs not Hispanic)                                       | 1.07                          | 1.04  | — | 1.10          | 1.23  | 1.13 | —     | 1.35  | 1.06 | 0.99                        | —     | 1.14 | 1.16          | 1.10  | — | 1.22  | 1.03  | 0.92 | — | 1.15 | 1.13  | 1.04  | — | 1.24  |  |
| Body-mass index category, kg/m <sup>2</sup>                      |                               |       |   |               |       |      |       |       |      |                             |       |      |               |       |   |       |       |      |   |      |       |       |   |       |  |
| <18.5                                                            | 1.35                          | 1.29  | — | 1.42          | 1.51  | 1.32 | —     | 1.74  | 2.49 | 2.33                        | —     | 2.65 | 1.14          | 1.02  | — | 1.29  | 1.35  | 1.06 | — | 1.72 | 1.82  | 1.59  | — | 2.07  |  |
| 18.5-24.9                                                        | ref                           | ref   | — | ref           | ref   | ref  | —     | ref   | ref  | ref                         | —     | ref  | ref           | ref   | — | ref   | ref   | ref  | — | ref  | ref   | ref   | — | ref   |  |
| 25-29.9                                                          | 0.75                          | 0.73  | — | 0.76          | 0.70  | 0.65 | —     | 0.74  | 0.54 | 0.52                        | —     | 0.56 | 0.81          | 0.78  | — | 0.85  | 0.89  | 0.82 | — | 0.97 | 0.73  | 0.68  | — | 0.79  |  |
| 30-34.9                                                          | 0.67                          | 0.65  | — | 0.68          | 0.61  | 0.57 | —     | 0.66  | 0.42 | 0.40                        | —     | 0.44 | 0.76          | 0.73  | — | 0.80  | 0.88  | 0.81 | — | 0.96 | 0.68  | 0.64  | — | 0.74  |  |
| 35-39.9                                                          | 0.63                          | 0.61  | — | 0.64          | 0.57  | 0.52 | —     | 0.62  | 0.37 | 0.35                        | —     | 0.40 | 0.76          | 0.72  | — | 0.80  | 0.85  | 0.76 | — | 0.94 | 0.64  | 0.59  | — | 0.70  |  |
| ≥40                                                              | 0.65                          | 0.63  | — | 0.67          | 0.58  | 0.53 | —     | 0.65  | 0.43 | 0.39                        | —     | 0.46 | 0.87          | 0.81  | — | 0.92  | 1.03  | 0.91 | — | 1.16 | 0.79  | 0.72  | — | 0.88  |  |
| Tobacco use                                                      |                               |       |   |               |       |      |       |       |      |                             |       |      |               |       |   |       |       |      |   |      |       |       |   |       |  |
| Never                                                            | ref                           | ref   | — | ref           | ref   | ref  | —     | ref   | ref  | ref                         | —     | ref  | ref           | ref   | — | ref   | ref   | ref  | — | ref  | ref   | ref   | — | ref   |  |
| Former                                                           | 1.25                          | 1.22  | — | 1.27          | 1.12  | 1.05 | —     | 1.19  | 1.09 | 1.04                        | —     | 1.13 | 1.11          | 1.08  | — | 1.15  | 1.10  | 1.02 | — | 1.17 | 1.18  | 1.12  | — | 1.24  |  |
| Current                                                          | 2.02                          | 1.98  | — | 2.05          | 1.76  | 1.66 | —     | 1.87  | 1.66 | 1.60                        | —     | 1.74 | 1.39          | 1.35  | — | 1.44  | 1.29  | 1.20 | — | 1.39 | 1.24  | 1.17  | — | 1.32  |  |
| Urban/rural/highly rural residence                               |                               |       |   |               |       |      |       |       |      |                             |       |      |               |       |   |       |       |      |   |      |       |       |   |       |  |
| Highly rural                                                     | 0.68                          | 0.64  | — | 0.73          | 0.98  | 0.82 | —     | 1.18  | 0.92 | 0.81                        | —     | 1.05 | 0.57          | 0.50  | — | 0.66  | 0.74  | 0.54 | — | 1.00 | 1.16  | 0.98  | — | 1.38  |  |
| Rural                                                            | 0.74                          | 0.73  | — | 0.75          | 0.74  | 0.70 | —     | 0.78  | 0.89 | 0.86                        | —     | 0.92 | 0.70          | 0.68  | — | 0.72  | 0.87  | 0.82 | — | 0.93 | 1.03  | 0.99  | — | 1.08  |  |
| Urban                                                            | ref                           | ref   | — | ref           | ref   | ref  | —     | ref   | ref  | ref                         | —     | ref  | ref           | ref   | — | ref   | ref   | ref  | — | ref  | ref   | ref   | — | ref   |  |
| Unknown                                                          | 0.25                          | 0.18  | — | 0.35          | 0.35  | 0.13 | —     | 0.94  | 0.80 | 0.51                        | —     | 1.25 | 0.27          | 0.10  | — | 0.74  | 0.55  | 0.08 | — | 3.98 | 1.75  | 0.72  | — | 4.27  |  |
| Diabetes                                                         | 1.17                          | 1.15  | — | 1.19          | 1.25  | 1.20 | —     | 1.31  | 1.40 | 1.36                        | —     | 1.45 | 1.30          | 1.26  | — | 1.33  | 1.26  | 1.19 | — | 1.33 | 1.36  | 1.30  | — | 1.42  |  |
| Hypertension                                                     | 1.21                          | 1.19  | — | 1.24          | 1.29  | 1.21 | —     | 1.38  | 1.09 | 1.04                        | —     | 1.13 | 1.30          | 1.25  | — | 1.35  | 1.29  | 1.18 | — | 1.41 | 0.96  | 0.90  | — | 1.02  |  |
| Cardiovascular disease                                           | 2.03                          | 2.00  | — | 2.07          | 2.67  | 2.53 | —     | 2.82  | 1.87 | 1.80                        | —     | 1.94 | 1.84          | 1.78  | — | 1.89  | 2.08  | 1.94 | — | 2.23 | 1.24  | 1.18  | — | 1.30  |  |
| Heart failure                                                    | 2.12                          | 2.08  | — | 2.16          | 2.33  | 2.21 | —     | 2.45  | 2.50 | 2.41                        | —     | 2.59 | 1.64          | 1.59  | — | 1.70  | 1.53  | 1.43 | — | 1.63 | 1.31  | 1.25  | — | 1.38  |  |
| Alcohol use disorder                                             | 1.12                          | 1.10  | — | 1.14          | 1.03  | 0.97 | —     | 1.09  | 0.78 | 0.75                        | —     | 0.82 | 0.75          | 0.73  | — | 0.78  | 0.86  | 0.79 | — | 0.93 | 0.68  | 0.64  | — | 0.73  |  |
| Estimated glomerular filtration rate, ml/min/1.73 m <sup>2</sup> |                               |       |   |               |       |      |       |       |      |                             |       |      |               |       |   |       |       |      |   |      |       |       |   |       |  |
| ≥ 90                                                             | ref                           | ref   | — | ref           | ref   | ref  | —     | ref   | ref  | ref                         | —     | ref  | ref           | ref   | — | ref   | ref   | ref  | — | ref  | ref   | ref   | — | ref   |  |
| 60-89                                                            | 0.80                          | 0.79  | — | 0.82          | 0.80  | 0.75 | —     | 0.85  | 0.60 | 0.57                        | —     | 0.62 | 0.90          | 0.86  | — | 0.93  | 0.96  | 0.88 | — | 1.04 | 1.09  | 1.02  | — | 1.18  |  |
| 45-59                                                            | 0.84                          | 0.81  | — | 0.86          | 0.84  | 0.78 | —     | 0.91  | 0.71 | 0.67                        | —     | 0.74 | 0.98          | 0.94  | — | 1.03  | 1.00  | 0.91 | — | 1.09 | 1.44  | 1.33  | — | 1.56  |  |
| 30-44                                                            | 0.93                          | 0.90  | — | 0.96          | 0.92  | 0.84 | —     | 1.01  | 0.99 | 0.93                        | —     | 1.05 | 1.10          | 1.04  | — | 1.16  | 1.14  | 1.02 | — | 1.29 | 1.83  | 1.68  | — | 1.99  |  |
| 15-29                                                            | 1.14                          | 1.09  | — | 1.20          | 1.14  | 1.01 | —     | 1.29  | 2.07 | 1.94                        | —     | 2.21 | 1.31          | 1.21  | — | 1.42  | 1.32  | 1.14 | — | 1.53 | 2.65  | 2.36  | — | 2.97  |  |
| <15 or dialysis                                                  | 1.60                          | 1.52  | — | 1.69          | 1.77  | 1.56 | —     | 2.01  | 3.08 | 2.85                        | —     | 3.32 | 1.46          | 1.33  | — | 1.60  | 1.51  | 1.29 | — | 1.77 | 2.48  | 2.16  | — | 2.85  |  |

Models additionally adjusted for index month and geographic location by Veterans Integrated Service Network location

**Table 3.** Odds ratios from logistic regression models testing the association of specific statins compared to no statin with adverse 30-day outcomes among VHA Veterans with a positive respiratory swab for SARS-CoV-2, n=231,017

|                                             | Hospital admission |        |   |      |         | ICU admission |        |   |       |         | Death |        |   |       |         |
|---------------------------------------------|--------------------|--------|---|------|---------|---------------|--------|---|-------|---------|-------|--------|---|-------|---------|
|                                             | OR                 | 95% CI |   |      | p value | OR            | 95% CI |   |       | p value | OR    | 95% CI |   |       | p value |
| No statin                                   | ref                |        |   |      |         | ref           |        |   |       |         | ref   |        |   |       |         |
| Atorvastatin                                | 0.98               | 0.95   | — | 1.01 | 0.136   | 0.96          | 0.90   | — | 1.02  | 0.194   | 0.80  | 0.76   | — | 0.84  | <0.001  |
| Fluvastatin                                 | 1.47               | 0.45   | — | 4.82 | 0.524   | 1.79          | 0.23   | — | 13.80 | 0.577   | 0.55  | 0.07   | — | 4.43  | 0.575   |
| Lovastatin                                  | 0.73               | 0.57   | — | 0.93 | 0.012   | 0.48          | 0.26   | — | 0.90  | 0.022   | 0.64  | 0.45   | — | 0.91  | 0.013   |
| Pitavastatin                                | 0.45               | 0.16   | — | 1.26 | 0.128   | 0.66          | 0.09   | — | 4.80  | 0.679   | 0.82  | 0.25   | — | 2.68  | 0.738   |
| Pravastatin                                 | 0.93               | 0.86   | — | 1.00 | 0.045   | 0.94          | 0.81   | — | 1.10  | 0.443   | 0.78  | 0.70   | — | 0.87  | <0.001  |
| Rosuvastatin                                | 0.81               | 0.76   | — | 0.86 | <0.001  | 0.82          | 0.72   | — | 0.93  | 0.002   | 0.72  | 0.65   | — | 0.79  | <0.001  |
| Simvastatin                                 | 0.91               | 0.86   | — | 0.97 | 0.001   | 0.91          | 0.80   | — | 1.02  | 0.107   | 0.77  | 0.71   | — | 0.84  | <0.001  |
| Sex at birth, female                        | 0.75               | 0.71   | — | 0.80 | <0.001  | 0.74          | 0.65   | — | 0.84  | <0.001  | 0.57  | 0.50   | — | 0.65  | <0.001  |
| Age category, years                         |                    |        |   |      |         |               |        |   |       |         |       |        |   |       |         |
| 19-39                                       | 0.61               | 0.58   | — | 0.66 | <0.001  | 0.60          | 0.51   | — | 0.71  | <0.001  | 0.15  | 0.11   | — | 0.21  | <0.001  |
| 40-49                                       | 0.75               | 0.71   | — | 0.80 | <0.001  | 0.68          | 0.59   | — | 0.79  | <0.001  | 0.38  | 0.30   | — | 0.48  | <0.001  |
| 50-59                                       | ref                |        |   |      |         | ref           |        |   |       |         | ref   |        |   |       |         |
| 60-69                                       | 1.28               | 1.23   | — | 1.34 | <0.001  | 1.32          | 1.21   | — | 1.45  | <0.001  | 2.85  | 2.55   | — | 3.20  | <0.001  |
| 70-79                                       | 1.43               | 1.36   | — | 1.49 | <0.001  | 1.49          | 1.36   | — | 1.64  | <0.001  | 5.92  | 5.31   | — | 6.60  | <0.001  |
| ≥80                                         | 1.81               | 1.71   | — | 1.91 | <0.001  | 1.62          | 1.45   | — | 1.82  | <0.001  | 13.86 | 12.37  | — | 15.54 | <0.001  |
| White (vs. not white)                       | 0.88               | 0.81   | — | 0.97 | 0.007   | 0.75          | 0.61   | — | 0.91  | 0.004   | 0.88  | 0.74   | — | 1.04  | 0.121   |
| Black (vs. not Black)                       | 1.36               | 1.24   | — | 1.50 | <0.001  | 1.10          | 0.89   | — | 1.35  | 0.390   | 0.78  | 0.66   | — | 0.94  | 0.007   |
| Hispanic (vs. not Hispanic)                 | 1.16               | 1.10   | — | 1.22 | <0.001  | 1.03          | 0.92   | — | 1.15  | 0.633   | 1.13  | 1.04   | — | 1.24  | 0.007   |
| Body-mass index category, kg/m <sup>2</sup> |                    |        |   |      |         |               |        |   |       |         |       |        |   |       |         |
| <18.5                                       | 1.15               | 1.02   | — | 1.29 | 0.025   | 1.35          | 1.06   | — | 1.73  | 0.015   | 1.82  | 1.59   | — | 2.08  | <0.001  |
| 18.5-24.9                                   | ref                |        |   |      |         | ref           |        |   |       |         | ref   |        |   |       |         |
| 25-29.9                                     | 0.81               | 0.78   | — | 0.85 | <0.001  | 0.89          | 0.82   | — | 0.97  | 0.006   | 0.73  | 0.68   | — | 0.79  | <0.001  |
| 30-34.9                                     | 0.76               | 0.73   | — | 0.80 | <0.001  | 0.88          | 0.81   | — | 0.97  | 0.006   | 0.68  | 0.64   | — | 0.74  | <0.001  |
| 35-39.9                                     | 0.76               | 0.72   | — | 0.80 | <0.001  | 0.85          | 0.76   | — | 0.94  | 0.002   | 0.64  | 0.59   | — | 0.70  | <0.001  |
| ≥40                                         | 0.87               | 0.81   | — | 0.92 | <0.001  | 1.03          | 0.91   | — | 1.16  | 0.675   | 0.79  | 0.72   | — | 0.88  | <0.001  |
| Tobacco use                                 |                    |        |   |      |         |               |        |   |       |         |       |        |   |       |         |
| Never                                       | ref                |        |   |      |         |               |        |   |       |         |       |        |   |       |         |
| Former                                      | 1.11               | 1.08   | — | 1.15 | <0.001  | 1.10          | 1.02   | — | 1.17  | 0.010   | 1.18  | 1.12   | — | 1.24  | <0.001  |
| Current                                     | 1.39               | 1.35   | — | 1.44 | <0.001  | 1.29          | 1.20   | — | 1.39  | <0.001  | 1.24  | 1.17   | — | 1.32  | <0.001  |
| Urban/rural/highly rural residence          |                    |        |   |      |         |               |        |   |       |         |       |        |   |       |         |
| Highly rural                                | 0.57               | 0.50   | — | 0.66 | <0.001  | 0.74          | 0.54   | — | 1.00  | 0.051   | 1.16  | 0.97   | — | 1.38  | 0.096   |
| Rural                                       | 0.70               | 0.68   | — | 0.72 | <0.001  | 0.88          | 0.82   | — | 0.93  | <0.001  | 1.04  | 0.99   | — | 1.08  | 0.140   |
| Urban                                       | ref                |        |   |      |         | ref           |        |   |       |         | ref   |        |   |       |         |
| Unknown                                     | 0.27               | 0.10   | — | 0.74 | 0.011   | 0.55          | 0.08   | — | 3.96  | 0.549   | 1.75  | 0.72   | — | 4.25  | 0.220   |
| Diabetes                                    | 1.29               | 1.26   | — | 1.33 | <0.001  | 1.26          | 1.19   | — | 1.33  | <0.001  | 1.36  | 1.30   | — | 1.42  | <0.001  |
| Hypertension                                | 1.30               | 1.25   | — | 1.35 | <0.001  | 1.29          | 1.18   | — | 1.41  | <0.001  | 0.96  | 0.90   | — | 1.02  | 0.149   |
| Cardiovascular disease                      | 1.84               | 1.78   | — | 1.89 | <0.001  | 2.08          | 1.94   | — | 2.23  | <0.001  | 1.24  | 1.18   | — | 1.30  | <0.001  |
| Heart failure                               | 1.64               | 1.58   | — | 1.69 | <0.001  | 1.53          | 1.43   | — | 1.63  | <0.001  | 1.31  | 1.25   | — | 1.38  | <0.001  |
| Alcohol use disorder                        | 0.75               | 0.73   | — | 0.78 | <0.001  | 0.86          | 0.79   | — | 0.93  | <0.001  | 0.69  | 0.64   | — | 0.73  | <0.001  |

**Table 3 CONTINUED.** Odds ratios from logistic regression models testing the association of individual statins compared to no statin with adverse 30-day outcomes among VHA Veterans with a positive respiratory swab for SARS-CoV-2, n=231,017

| Estimated glomerular filtration rate,<br>ml/min/1.73 m <sup>2</sup> | ref  |      |   |      |        | ref  |      |   |      |        | ref  |      |   |      |        |
|---------------------------------------------------------------------|------|------|---|------|--------|------|------|---|------|--------|------|------|---|------|--------|
| ≥ 90                                                                | 0.90 | 0.87 | — | 0.93 | <0.001 | 0.96 | 0.88 | — | 1.04 | 0.273  | 1.10 | 1.02 | — | 1.18 | 0.018  |
| 60-89                                                               | 0.99 | 0.94 | — | 1.03 | 0.519  | 1.00 | 0.91 | — | 1.10 | 0.941  | 1.44 | 1.33 | — | 1.56 | <0.001 |
| 45-59                                                               | 1.10 | 1.04 | — | 1.16 | 0.001  | 1.15 | 1.02 | — | 1.29 | 0.024  | 1.83 | 1.68 | — | 1.99 | <0.001 |
| 30-44                                                               | 1.31 | 1.21 | — | 1.42 | <0.001 | 1.32 | 1.14 | — | 1.53 | <0.001 | 2.65 | 2.36 | — | 2.97 | <0.001 |
| 15-29                                                               | 1.45 | 1.32 | — | 1.59 | <0.001 | 1.51 | 1.29 | — | 1.77 | <0.001 | 2.48 | 2.16 | — | 2.84 | <0.001 |
| <15 or dialysis                                                     |      |      |   |      |        |      |      |   |      |        |      |      |   |      |        |

Models additionally adjusted for month of diagnosis and geographic location by Veterans Integrated Service Network location; not adjusted for the presence of an active statin prescription six months prior to enrollment

For peer review only

**Table 4.** Odds ratios from logistic regression models testing the association of low- or moderate- vs. high-potency active statin prescription at enrollment with adverse 30-day outcomes among VHA Veterans with a positive respiratory swab for SARS-CoV-2, n=69,263

|                                                                  | Hospital admission |             |  |         |  | ICU admission |              |  |         |  | Death |              |  |         |  |
|------------------------------------------------------------------|--------------------|-------------|--|---------|--|---------------|--------------|--|---------|--|-------|--------------|--|---------|--|
|                                                                  | OR                 | 95% CI      |  | p value |  | OR            | 95% CI       |  | p value |  | OR    | 95% CI       |  | p value |  |
| High-potency statin                                              | 1.06               | 1.01 — 1.10 |  | 0.011   |  | 1.05          | 0.96 — 1.15  |  | 0.258   |  | 0.97  | 0.91 — 1.04  |  | 0.407   |  |
| Sex at birth, female                                             | 0.89               | 0.80 — 1.00 |  | 0.041   |  | 0.95          | 0.75 — 1.19  |  | 0.634   |  | 0.52  | 0.40 — 0.68  |  | <0.001  |  |
| Age category, years                                              |                    |             |  |         |  |               |              |  |         |  |       |              |  |         |  |
| 19-39                                                            | 0.82               | 0.63 — 1.06 |  | 0.123   |  | 0.46          | 0.22 — 0.98  |  | 0.045   |  | 0.10  | 0.01 — 0.73  |  | 0.023   |  |
| 40-49                                                            | 0.74               | 0.64 — 0.86 |  | <0.001  |  | 0.55          | 0.38 — 0.79  |  | 0.001   |  | 0.45  | 0.27 — 0.75  |  | 0.002   |  |
| 50-59                                                            | ref                |             |  |         |  | ref           |              |  |         |  | ref   |              |  |         |  |
| 60-69                                                            | 1.30               | 1.20 — 1.40 |  | <0.001  |  | 1.24          | 1.06 — 1.45  |  | 0.009   |  | 2.45  | 2.02 — 2.96  |  | <0.001  |  |
| 70-79                                                            | 1.47               | 1.36 — 1.58 |  | <0.001  |  | 1.47          | 1.25 — 1.72  |  | <0.001  |  | 4.42  | 3.67 — 5.32  |  | <0.001  |  |
| ≥80                                                              | 1.95               | 1.78 — 2.15 |  | <0.001  |  | 1.69          | 1.40 — 2.04  |  | <0.001  |  | 9.54  | 7.84 — 11.60 |  | <0.001  |  |
| White (vs not white)                                             | 0.81               | 0.69 — 0.96 |  | 0.012   |  | 0.75          | 0.52 — 1.08  |  | 0.118   |  | 0.85  | 0.64 — 1.11  |  | 0.221   |  |
| Black vs( not Black)                                             | 1.31               | 1.10 — 1.55 |  | 0.002   |  | 1.12          | 0.77 — 1.63  |  | 0.545   |  | 0.80  | 0.60 — 1.06  |  | 0.125   |  |
| Hispanic (vs not Hispanic)                                       | 1.12               | 1.02 — 1.22 |  | 0.013   |  | 0.91          | 0.75 — 1.10  |  | 0.330   |  | 1.20  | 1.04 — 1.38  |  | 0.014   |  |
| Body-mass index category, kg/m <sup>2</sup>                      |                    |             |  |         |  |               |              |  |         |  |       |              |  |         |  |
| <18.5                                                            | 1.04               | 0.79 — 1.38 |  | 0.766   |  | 1.19          | 0.71 — 1.98  |  | 0.511   |  | 1.45  | 1.02 — 2.05  |  | 0.039   |  |
| 18.5-24.9                                                        | ref                |             |  |         |  | ref           |              |  |         |  | ref   |              |  |         |  |
| 25-29.9                                                          | 0.81               | 0.75 — 0.86 |  | <0.001  |  | 0.89          | 0.77 — 1.02  |  | 0.095   |  | 0.78  | 0.70 — 0.87  |  | <0.001  |  |
| 30-34.9                                                          | 0.78               | 0.73 — 0.84 |  | <0.001  |  | 0.92          | 0.80 — 1.07  |  | 0.272   |  | 0.78  | 0.70 — 0.87  |  | <0.001  |  |
| 35-39.9                                                          | 0.78               | 0.71 — 0.85 |  | <0.001  |  | 0.90          | 0.76 — 1.06  |  | 0.188   |  | 0.75  | 0.67 — 0.85  |  | <0.001  |  |
| ≥40                                                              | 0.86               | 0.77 — 0.95 |  | 0.002   |  | 1.08          | 0.89 — 1.30  |  | 0.452   |  | 0.91  | 0.78 — 1.06  |  | 0.221   |  |
| Tobacco use                                                      |                    |             |  |         |  |               |              |  |         |  |       |              |  |         |  |
| Never                                                            | ref                |             |  |         |  | ref           |              |  |         |  | ref   |              |  |         |  |
| Former                                                           | 1.18               | 1.12 — 1.25 |  | <0.001  |  | 1.16          | 1.03 — 1.30  |  | 0.013   |  | 1.29  | 1.18 — 1.40  |  | <0.001  |  |
| Current                                                          | 1.36               | 1.28 — 1.44 |  | <0.001  |  | 1.36          | 1.19 — 1.55  |  | <0.001  |  | 1.21  | 1.09 — 1.34  |  | <0.001  |  |
| Urban/rural/highly rural residence                               |                    |             |  |         |  |               |              |  |         |  |       |              |  |         |  |
| Highly rural                                                     | 0.59               | 0.47 — 0.73 |  | <0.001  |  | 0.93          | 0.61 — 1.42  |  | 0.728   |  | 1.40  | 1.08 — 1.82  |  | 0.011   |  |
| Rural                                                            | 0.68               | 0.65 — 0.72 |  | <0.001  |  | 0.87          | 0.79 — 0.96  |  | 0.006   |  | 1.05  | 0.97 — 1.12  |  | 0.233   |  |
| Urban                                                            | ref                |             |  |         |  | ref           |              |  |         |  | ref   |              |  |         |  |
| Unknown                                                          | 0.17               | 0.02 — 1.26 |  | 0.083   |  | 1.69          | 0.22 — 12.83 |  | 0.612   |  | 1.41  | 0.31 — 6.48  |  | 0.662   |  |
| Diabetes                                                         | 1.29               | 1.23 — 1.35 |  | <0.001  |  | 1.16          | 1.05 — 1.27  |  | 0.003   |  | 1.31  | 1.22 — 1.41  |  | <0.001  |  |
| Hypertension                                                     | 1.28               | 1.18 — 1.39 |  | <0.001  |  | 1.38          | 1.14 — 1.67  |  | 0.001   |  | 0.98  | 0.85 — 1.11  |  | 0.704   |  |
| Cardiovascular disease                                           | 1.71               | 1.62 — 1.80 |  | <0.001  |  | 1.96          | 1.75 — 2.21  |  | <0.001  |  | 1.25  | 1.14 — 1.36  |  | <0.001  |  |
| Heart failure                                                    | 1.68               | 1.60 — 1.77 |  | <0.001  |  | 1.58          | 1.44 — 1.74  |  | <0.001  |  | 1.33  | 1.23 — 1.43  |  | <0.001  |  |
| Alcohol use disorder                                             | 0.66               | 0.62 — 0.71 |  | <0.001  |  | 0.81          | 0.71 — 0.94  |  | 0.004   |  | 0.69  | 0.61 — 0.77  |  | <0.001  |  |
| Estimated glomerular filtration rate, ml/min/1.73 m <sup>2</sup> |                    |             |  |         |  |               |              |  |         |  |       |              |  |         |  |
| ≥ 90                                                             | ref                |             |  |         |  | ref           |              |  |         |  | ref   |              |  |         |  |
| 60-89                                                            | 0.98               | 0.92 — 1.05 |  | 0.625   |  | 1.05          | 0.91 — 1.20  |  | 0.538   |  | 1.14  | 1.01 — 1.29  |  | 0.041   |  |
| 45-59                                                            | 1.08               | 1.00 — 1.16 |  | 0.050   |  | 1.05          | 0.90 — 1.24  |  | 0.530   |  | 1.58  | 1.37 — 1.82  |  | <0.001  |  |
| 30-44                                                            | 1.21               | 1.10 — 1.32 |  | <0.001  |  | 1.20          | 1.00 — 1.44  |  | 0.055   |  | 2.00  | 1.72 — 2.33  |  | <0.001  |  |
| 15-29                                                            | 1.53               | 1.35 — 1.72 |  | <0.001  |  | 1.37          | 1.09 — 1.72  |  | 0.007   |  | 3.19  | 2.69 — 3.78  |  | <0.001  |  |
| <15 or dialysis                                                  | 1.64               | 1.42 — 1.90 |  | <0.001  |  | 1.95          | 1.52 — 2.50  |  | <0.001  |  | 3.01  | 2.44 — 3.73  |  | <0.001  |  |

Models additionally adjusted for month of diagnosis and geographic location by Veterans Integrated Service Network location; not adjusted for the presence of an active statin prescription six months prior to enrollment

**Figure Legend**

1  
2 Fig. 1. ORs and 95% confidence intervals for associations of statin use at study enrollment with A) hospitalization, B) ICU admission, and C) death  
3  
4 at 30 days before and after adjustment for statin use six months prior to diagnosis among VHA Veterans with and without a positive respiratory  
5  
6 swab for SARS-CoV-2. All analyses are adjusted for sex, age, race/ethnicity, BMI, tobacco use, facility location, urban/rural status, eGFR, and  
7  
8 history of diabetes, hypertension, cardiovascular disease, heart failure, and alcohol use disorder.  
9  
10  
11  
12  
13  
14  
15  
16  
17  
18  
19  
20  
21  
22  
23  
24  
25  
26  
27  
28  
29  
30  
31  
32  
33  
34  
35  
36  
37  
38  
39  
40  
41  
42  
43  
44  
45  
46  
47

For peer review only



1  
2  
3  
4  
5  
6  
7  
8  
9  
10  
11  
12  
13  
14  
15  
16  
17  
18  
19  
20  
21  
22  
23  
24  
25  
26  
27  
28  
29  
30  
31  
32  
33  
34  
35  
36  
37  
38  
39  
40  
41  
42  
43  
44  
45  
46  
47  
48  
49  
50  
51  
52  
53  
54  
55  
56  
57  
58  
59  
60

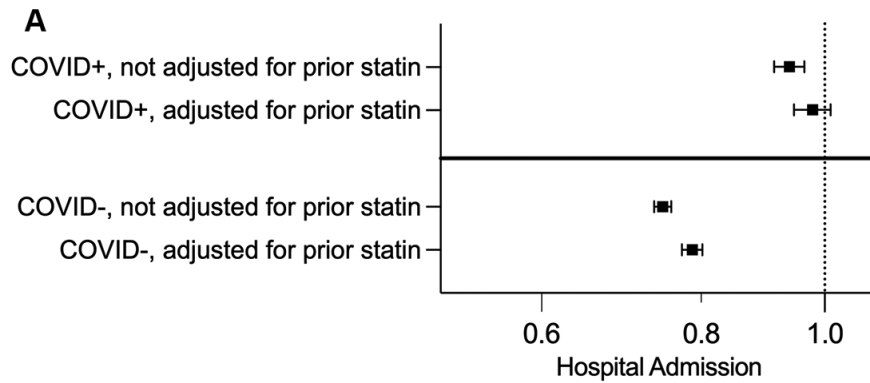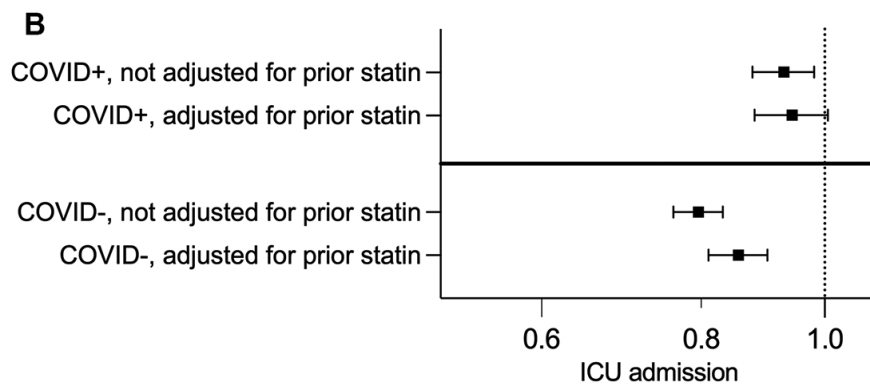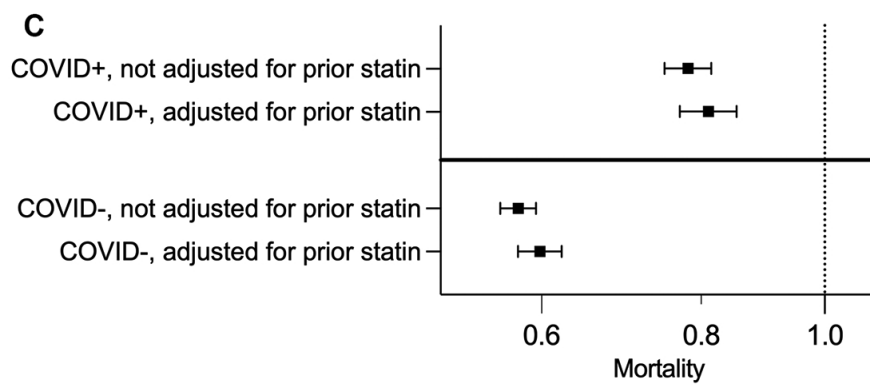

239x322mm (118 x 118 DPI)

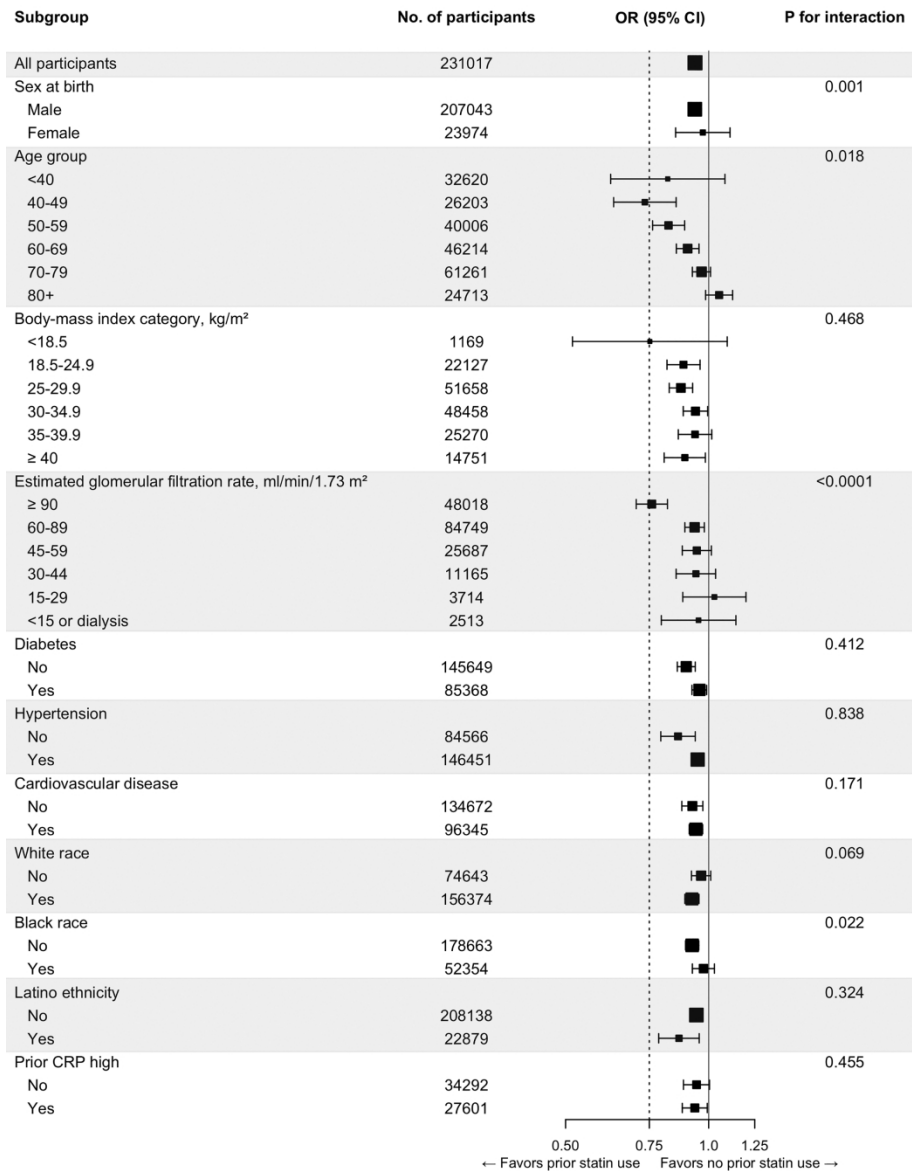

293x387mm (236 x 236 DPI)

1  
2  
3  
4  
5  
6  
7  
8  
9  
10  
11  
12  
13  
14  
15  
16  
17  
18  
19  
20  
21  
22  
23  
24  
25  
26  
27  
28  
29  
30  
31  
32  
33  
34  
35  
36  
37  
38  
39  
40  
41  
42  
43  
44  
45  
46  
47  
48  
49  
50  
51  
52  
53  
54  
55  
56  
57  
58  
59  
60

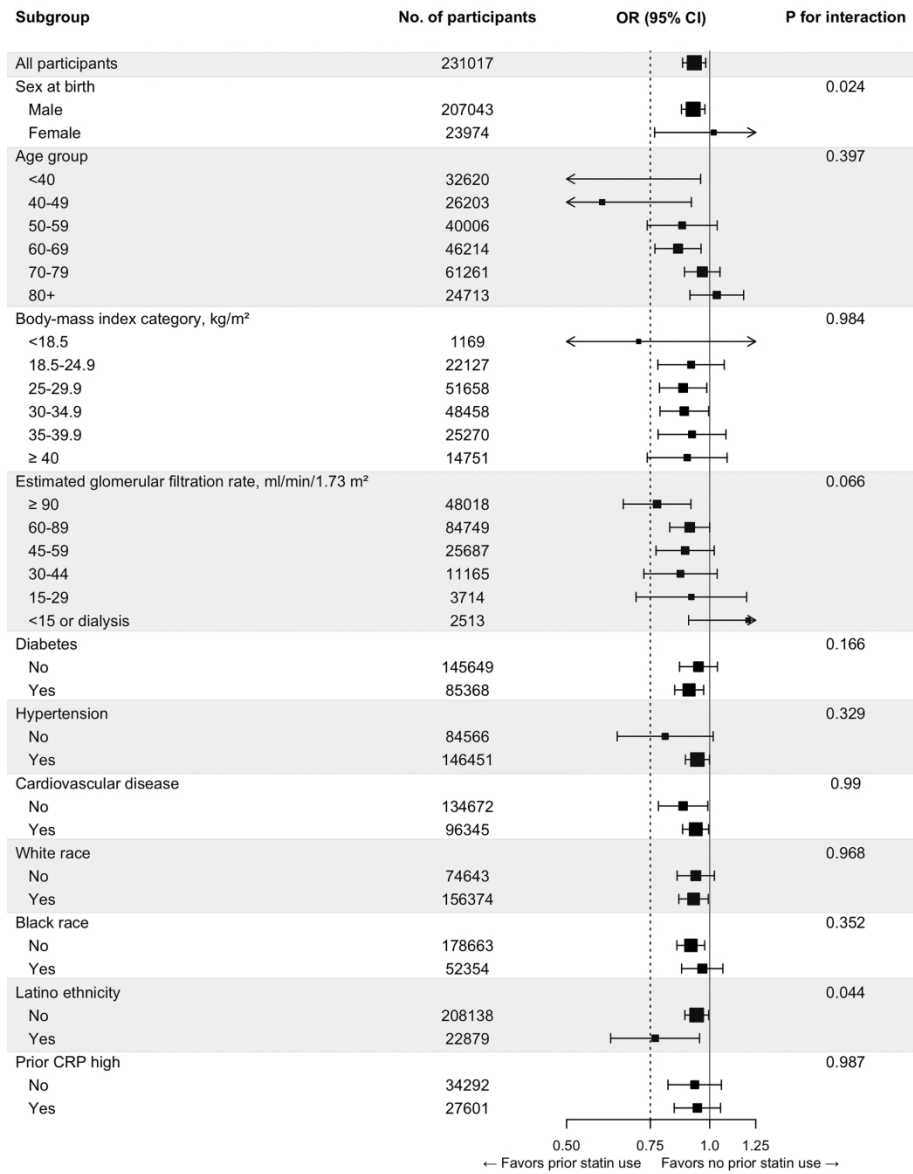

293x387mm (236 x 236 DPI)

1  
2  
3  
4  
5  
6  
7  
8  
9  
10  
11  
12  
13  
14  
15  
16  
17  
18  
19  
20  
21  
22  
23  
24  
25  
26  
27  
28  
29  
30  
31  
32  
33  
34  
35  
36  
37  
38  
39  
40  
41  
42  
43  
44  
45  
46  
47  
48  
49  
50  
51  
52  
53  
54  
55  
56  
57  
58  
59  
60

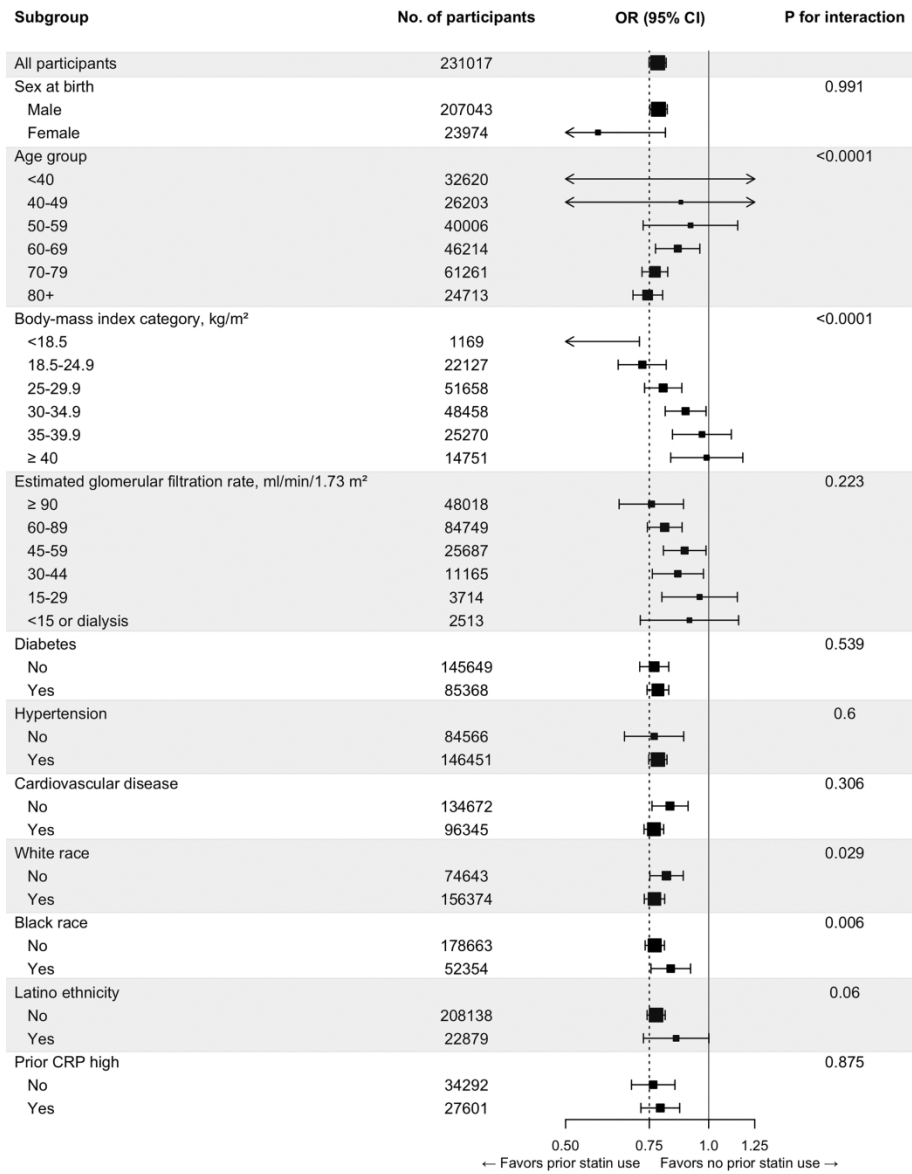

293x387mm (236 x 236 DPI)

STROBE Statement—Checklist of items that should be included in reports of *cohort studies*

|                              | Item No | Recommendation                                                                                                                                                                                                                                                                                                         | Page No |
|------------------------------|---------|------------------------------------------------------------------------------------------------------------------------------------------------------------------------------------------------------------------------------------------------------------------------------------------------------------------------|---------|
| <b>Title and abstract</b>    | 1       | (a) Indicate the study's design with a commonly used term in the title or the abstract<br>(b) Provide in the abstract an informative and balanced summary of what was done and what was found                                                                                                                          | 1       |
| <b>Introduction</b>          |         |                                                                                                                                                                                                                                                                                                                        |         |
| Background/rationale         | 2       | Explain the scientific background and rationale for the investigation being reported                                                                                                                                                                                                                                   | 4       |
| Objectives                   | 3       | State specific objectives, including any prespecified hypotheses                                                                                                                                                                                                                                                       | 4       |
| <b>Methods</b>               |         |                                                                                                                                                                                                                                                                                                                        |         |
| Study design                 | 4       | Present key elements of study design early in the paper                                                                                                                                                                                                                                                                | 4       |
| Setting                      | 5       | Describe the setting, locations, and relevant dates, including periods of recruitment, exposure, follow-up, and data collection                                                                                                                                                                                        | 5       |
| Participants                 | 6       | (a) Give the eligibility criteria, and the sources and methods of selection of participants. Describe methods of follow-up<br>(b) For matched studies, give matching criteria and number of exposed and unexposed                                                                                                      | 5       |
| Variables                    | 7       | Clearly define all outcomes, exposures, predictors, potential confounders, and effect modifiers. Give diagnostic criteria, if applicable                                                                                                                                                                               | 6       |
| Data sources/<br>measurement | 8*      | For each variable of interest, give sources of data and details of methods of assessment (measurement). Describe comparability of assessment methods if there is more than one group                                                                                                                                   | 6       |
| Bias                         | 9       | Describe any efforts to address potential sources of bias                                                                                                                                                                                                                                                              | 6       |
| Study size                   | 10      | Explain how the study size was arrived at                                                                                                                                                                                                                                                                              | 5       |
| Quantitative variables       | 11      | Explain how quantitative variables were handled in the analyses. If applicable, describe which groupings were chosen and why                                                                                                                                                                                           | 6       |
| Statistical methods          | 12      | (a) Describe all statistical methods, including those used to control for confounding<br>(b) Describe any methods used to examine subgroups and interactions<br>(c) Explain how missing data were addressed<br>(d) If applicable, explain how loss to follow-up was addressed<br>(e) Describe any sensitivity analyses | 6       |
| <b>Results</b>               |         |                                                                                                                                                                                                                                                                                                                        |         |
| Participants                 | 13*     | (a) Report numbers of individuals at each stage of study—eg numbers potentially eligible, examined for eligibility, confirmed eligible, included in the study, completing follow-up, and analysed<br>(b) Give reasons for non-participation at each stage<br>(c) Consider use of a flow diagram                        | 7       |
| Descriptive data             | 14*     | (a) Give characteristics of study participants (eg demographic, clinical, social) and information on exposures and potential confounders<br>(b) Indicate number of participants with missing data for each variable of interest<br>(c) Summarise follow-up time (eg, average and total amount)                         | 7       |
| Outcome data                 | 15*     | Report numbers of outcome events or summary measures over time                                                                                                                                                                                                                                                         | 7       |

|    |                          |    |                                                                                                                                                                                                              |    |
|----|--------------------------|----|--------------------------------------------------------------------------------------------------------------------------------------------------------------------------------------------------------------|----|
| 1  | Main results             | 16 | (a) Give unadjusted estimates and, if applicable, confounder-adjusted estimates and their precision (eg, 95% confidence interval). Make clear which confounders were adjusted for and why they were included | 8  |
| 2  |                          |    | (b) Report category boundaries when continuous variables were categorized                                                                                                                                    |    |
| 3  |                          |    | (c) If relevant, consider translating estimates of relative risk into absolute risk for a meaningful time period                                                                                             |    |
| 4  |                          |    |                                                                                                                                                                                                              |    |
| 5  |                          |    |                                                                                                                                                                                                              |    |
| 6  |                          |    |                                                                                                                                                                                                              |    |
| 7  |                          |    |                                                                                                                                                                                                              |    |
| 8  |                          |    |                                                                                                                                                                                                              |    |
| 9  | Other analyses           | 17 | Report other analyses done—eg analyses of subgroups and interactions, and sensitivity analyses                                                                                                               | 8  |
| 10 |                          |    |                                                                                                                                                                                                              |    |
| 11 | <b>Discussion</b>        |    |                                                                                                                                                                                                              |    |
| 12 |                          |    |                                                                                                                                                                                                              |    |
| 13 | Key results              | 18 | Summarise key results with reference to study objectives                                                                                                                                                     | 8  |
| 14 | Limitations              | 19 | Discuss limitations of the study, taking into account sources of potential bias or imprecision. Discuss both direction and magnitude of any potential bias                                                   | 10 |
| 15 |                          |    |                                                                                                                                                                                                              |    |
| 16 | Interpretation           | 20 | Give a cautious overall interpretation of results considering objectives, limitations, multiplicity of analyses, results from similar studies, and other relevant evidence                                   | 9  |
| 17 |                          |    |                                                                                                                                                                                                              |    |
| 18 |                          |    |                                                                                                                                                                                                              |    |
| 19 | Generalisability         | 21 | Discuss the generalisability (external validity) of the study results                                                                                                                                        | 10 |
| 20 |                          |    |                                                                                                                                                                                                              |    |
| 21 | <b>Other information</b> |    |                                                                                                                                                                                                              |    |
| 22 | Funding                  | 22 | Give the source of funding and the role of the funders for the present study and, if applicable, for the original study on which the present article is based                                                | 3  |
| 23 |                          |    |                                                                                                                                                                                                              |    |
| 24 |                          |    |                                                                                                                                                                                                              |    |

\*Give information separately for exposed and unexposed groups.

**Note:** An Explanation and Elaboration article discusses each checklist item and gives methodological background and published examples of transparent reporting. The STROBE checklist is best used in conjunction with this article (freely available on the Web sites of PLoS Medicine at <http://www.plosmedicine.org/>, Annals of Internal Medicine at <http://www.annals.org/>, and Epidemiology at <http://www.epidem.com/>). Information on the STROBE Initiative is available at <http://www.strobe-statement.org>.

# BMJ Open

## Associations of statin use with 30-day adverse outcomes among 4,801,406 U.S. Veterans with and without SARS-CoV-2: An observational cohort study

|                                                                                                                                                         |                                                                                                                                                                                                                                                                                                                                                                                                                                                                                                                                                                                                                                                                                                                                                                                                                                                                                                                                             |
|---------------------------------------------------------------------------------------------------------------------------------------------------------|---------------------------------------------------------------------------------------------------------------------------------------------------------------------------------------------------------------------------------------------------------------------------------------------------------------------------------------------------------------------------------------------------------------------------------------------------------------------------------------------------------------------------------------------------------------------------------------------------------------------------------------------------------------------------------------------------------------------------------------------------------------------------------------------------------------------------------------------------------------------------------------------------------------------------------------------|
| Journal:                                                                                                                                                | <i>BMJ Open</i>                                                                                                                                                                                                                                                                                                                                                                                                                                                                                                                                                                                                                                                                                                                                                                                                                                                                                                                             |
| Manuscript ID                                                                                                                                           | bmjopen-2021-058363.R2                                                                                                                                                                                                                                                                                                                                                                                                                                                                                                                                                                                                                                                                                                                                                                                                                                                                                                                      |
| Article Type:                                                                                                                                           | Original research                                                                                                                                                                                                                                                                                                                                                                                                                                                                                                                                                                                                                                                                                                                                                                                                                                                                                                                           |
| Date Submitted by the Author:                                                                                                                           | 20-Jan-2022                                                                                                                                                                                                                                                                                                                                                                                                                                                                                                                                                                                                                                                                                                                                                                                                                                                                                                                                 |
| Complete List of Authors:                                                                                                                               | Wander, Pandora; VA Puget Sound Health Care System Seattle Division; University of Washington, Department of Medicine<br>Lowy, Elliott; Veterans Affairs Puget Sound Health Care System; University of Washington, Department of Health Systems and Population Health<br>Beste, Lauren A.; Veterans Affairs Puget Sound Health Care System; University of Washington, Department of Medicine<br>Tulloch-Palomino, Luis; Veterans Affairs Puget Sound Health Care System; University of Washington, Department of Medicine<br>Korpak, Anna; Veterans Affairs Puget Sound Health Care System<br>Peterson, Alexander; Veterans Affairs Puget Sound Health Care System<br>Kahn, Steven E.; University of Washington<br>Danaei, Goodarz; Harvard School of Public Health, Department of Global Health and Population<br>Boyko, Edward J.; Veterans Affairs Puget Sound Health Care System, Seattle Epidemiologic Research and Information Center |
| <b>Primary Subject Heading</b>:                                                                                                                         | Public health                                                                                                                                                                                                                                                                                                                                                                                                                                                                                                                                                                                                                                                                                                                                                                                                                                                                                                                               |
| Secondary Subject Heading:                                                                                                                              | Epidemiology, Infectious diseases, General practice / Family practice                                                                                                                                                                                                                                                                                                                                                                                                                                                                                                                                                                                                                                                                                                                                                                                                                                                                       |
| Keywords:                                                                                                                                               | COVID-19, Epidemiology < TROPICAL MEDICINE, INTERNAL MEDICINE                                                                                                                                                                                                                                                                                                                                                                                                                                                                                                                                                                                                                                                                                                                                                                                                                                                                               |
| Note: The following files were submitted by the author for peer review, but cannot be converted to PDF. You must view these files (e.g. movies) online. |                                                                                                                                                                                                                                                                                                                                                                                                                                                                                                                                                                                                                                                                                                                                                                                                                                                                                                                                             |
| app fig 1. forest_adm_7-20-21.jpj<br>app fig 2. forest_icu_7-20-21.jpj<br>app fig 3. forest_mort_7-20-21.jpj                                            |                                                                                                                                                                                                                                                                                                                                                                                                                                                                                                                                                                                                                                                                                                                                                                                                                                                                                                                                             |

SCHOLARONE™  
Manuscripts



I, the Submitting Author has the right to grant and does grant on behalf of all authors of the Work (as defined in the below author licence), an exclusive licence and/or a non-exclusive licence for contributions from authors who are: i) UK Crown employees; ii) where BMJ has agreed a CC-BY licence shall apply, and/or iii) in accordance with the terms applicable for US Federal Government officers or employees acting as part of their official duties; on a worldwide, perpetual, irrevocable, royalty-free basis to BMJ Publishing Group Ltd ("BMJ") its licensees and where the relevant Journal is co-owned by BMJ to the co-owners of the Journal, to publish the Work in this journal and any other BMJ products and to exploit all rights, as set out in our [licence](#).

The Submitting Author accepts and understands that any supply made under these terms is made by BMJ to the Submitting Author unless you are acting as an employee on behalf of your employer or a postgraduate student of an affiliated institution which is paying any applicable article publishing charge ("APC") for Open Access articles. Where the Submitting Author wishes to make the Work available on an Open Access basis (and intends to pay the relevant APC), the terms of reuse of such Open Access shall be governed by a Creative Commons licence – details of these licences and which [Creative Commons](#) licence will apply to this Work are set out in our licence referred to above.

Other than as permitted in any relevant BMJ Author's Self Archiving Policies, I confirm this Work has not been accepted for publication elsewhere, is not being considered for publication elsewhere and does not duplicate material already published. I confirm all authors consent to publication of this Work and authorise the granting of this licence.



1 **Associations of statin use with 30-day adverse outcomes among 4,801,406 US Veterans with and**  
2 **without SARS-CoV-2: an observational cohort study**  
3  
4  
5

6 **Authors:** Pandora L Wander, MD, MS<sup>a,b</sup>; Elliott Lowy, PhD<sup>a,c</sup>; Lauren A Beste, MD, MSc<sup>a,b</sup>; Luis Tulloch-  
7 Palomino, MD<sup>a,b</sup>; Anna Korpak, PhD<sup>a</sup>; Alexander C Peterson, MSc<sup>a</sup>; Steven E Kahn, MB, ChB<sup>a,b</sup>; Goodarz  
8 Danaei, MD, ScD<sup>d</sup>; Edward J Boyko, MD, MPH<sup>a,b</sup>  
9  
10  
11  
12  
13  
14

15 **Affiliations:**

16  
17 <sup>a</sup>Veterans Affairs Puget Sound Health Care System, Seattle, WA

18  
19 <sup>b</sup>Department of Medicine, University of Washington, Seattle, WA

20  
21 <sup>c</sup>Department of Health Systems and Population Health, University of Washington, Seattle, WA

22  
23 <sup>d</sup>Departments of Global Health and Population, Epidemiology, Harvard T.H. Chan School of Public Health,  
24 Boston, MA  
25  
26  
27  
28  
29

30 Correspondence to:

31 Pandora L. Wander

32 VA Puget Sound Healthcare System

33  
34 1660 S. Columbian Way, S-111-MED

35  
36  
37  
38 Seattle, WA 98108

39  
40 [lwander@u.washington.edu](mailto:lwander@u.washington.edu)

41  
42 ORCID: 0000-0003-3671-1464  
43  
44  
45

46 Running title: Statin use and 30-day outcomes in SAR-CoV-2  
47  
48  
49  
50

51 Word count (not including title, abstract, acknowledgment, references, tables, and figure legends): 2,900  
52  
53  
54  
55  
56  
57  
58  
59  
60

## ABSTRACT

**Objective:** To estimate associations of statin use with hospitalization, intensive care unit (ICU) admission, and mortality at 30 days among individuals with and without a positive test for SARS-CoV-2.

**Design:** Retrospective cohort study.

**Setting:** U.S. Veterans Health Administration (VHA).

**Participants:** All Veterans receiving VHA health care with  $\geq 1$  positive nasal swab for SARS-CoV-2 between March 1, 2020 and March 10, 2021 (cases;  $n=231,154$ ) and a comparator group of controls comprising all Veterans who did not have a positive nasal swab for SARS-CoV-2 but who did have  $\geq 1$  clinical lab test performed during the same time period ( $n=4,570,252$ ).

**Main outcomes:** Associations of (1) Any statin use, (2) use of specific statins, or (3) low-/moderate- vs. high-intensity statin use at the time of positive nasal swab for SARS-CoV-2 (cases) or result of clinical lab test (controls) assessed from pharmacy records with hospitalization, ICU admission, and death at 30 days. We also examined whether associations differed between individuals with and without a positive test for SARS-CoV-2.

**Results:** Among individuals who tested positive for SARS-CoV-2, statin use was associated with lower odds of death at 30 days (OR 0.81 [95%CI 0.77–0.85]) but not with hospitalization or ICU admission. Associations were similar comparing use of each specific statin to no statin. Compared to low-/moderate-intensity statin use, high-intensity statin use was not associated with lower odds of ICU admission or death. Over the same period, associations of statin use with 30-day outcomes were significantly stronger among individuals without a positive test for SARS-CoV-2: hospitalization OR 0.79 (95%CI 0.77–0.80), ICU admission OR 0.86 (95%CI 0.81–0.90), and death 0.60 (95%CI 0.58–0.62;  $p$  for interaction all  $<0.001$ ).

**Conclusions:** Associations of statin use with lower adverse 30-day outcomes are weaker among individuals who tested positive for SARS-CoV-2 compared to individuals without a positive test, indicating that statins do not exert SARS-CoV-2-specific effects.

### Strengths and limitations of this study

- Large, well characterized national (U.S.) sample.
- First study to formally assess and compare statin effects seen in SARS-CoV-2 infection using a negative control.

- Observational design cannot exclude the possibility of residual confounding.
- Did not capture hospitalizations or diagnoses occurring outside Veterans Health Administration.

For peer review only

## INTRODUCTION

1  
2 New cases of COVID-19/SARS-CoV-2 infection continue to occur at high rates in the United States and  
3  
4 worldwide with few treatments available to decrease mortality. Statin use at the time of COVID-19 diagnosis  
5  
6 has been associated with a lower risk of short-term mortality in observational studies<sup>1</sup> and systematic reviews<sup>2</sup>.  
7  
8 Based on these early findings and their demonstrated effects on inflammation, oxidative stress, and immune  
9  
10 responses, statins have been proposed as a low-cost, accessible, and effective treatment for COVID-19<sup>3</sup>.  
11  
12 However, an inverse association of statin use with mortality is not uniformly seen across observational studies  
13  
14 of persons with COVID-19<sup>4 5</sup>. Further, preliminary findings from a randomized placebo-controlled trial of  
15  
16 patients admitted to the ICU did not show a protective effect of atorvastatin 20 mg/day on 30-day mortality after  
17  
18 COVID-19 diagnosis, among patients not taking statins prior to admission<sup>6</sup>. These paradoxical findings may  
19  
20 reflect the presence of residual confounding in observational studies. In addition, effects of statins on mortality  
21  
22 after COVID-19 may differ across populations, for example, among individuals with or without cardiovascular  
23  
24 disease (CVD), or specific to certain statins but not all medications in this class. Therefore, observational  
25  
26 studies with comprehensive strategies to examine potential bias from unmeasured confounding—such as the  
27  
28 use of negative control populations<sup>2</sup>—are needed to improve estimates of the potential causal effect of statin  
29  
30 use at diagnosis on mortality after COVID-19.  
31  
32  
33  
34  
35

36 To address these gaps, we used national data from the Veterans Health Administration (VHA) to quantify the  
37  
38 independent association of statin use at diagnosis with adverse outcomes from COVID-19 at 30 days,  
39  
40 including hospitalization, intensive-care unit (ICU) admission, and mortality. We used the following strategies to  
41  
42 mitigate or estimate bias: 1) directed-acyclic graphs to guide the choice of potential confounders; 2)  
43  
44 comparison of associations among SARS-CoV-2 infected individuals (n=231,154) with associations among an  
45  
46 uninfected comparator sample (n=4,570,252); and 3) a dose-response analysis comparing low- or moderate-  
47  
48 intensity statin use to high-intensity use. In additional analyses, we investigated associations of individual  
49  
50 statins with 30-day outcomes after COVID-19 and evaluated the magnitude of the statin-mortality association  
51  
52 in strata of sex, age, race, BMI, clinical comorbidities, and C-reactive protein (CRP) level prior to diagnosis.  
53  
54  
55  
56

## METHODS

## Study setting and population

The Veterans Health Administration (VHA)—the largest integrated healthcare system in the United States—provides care to more than 7 million Veterans at 170 medical centers and 1,074 outpatient sites<sup>7</sup>. We used data from the Corporate Data Warehouse (CDW), a data repository derived from VHA's integrated electronic medical record, including a COVID-19 Shared Data Resource, which contains analytic variables for all enrollees tested for SARS-CoV-2<sup>8</sup>. The study was approved by the institutional review board at VA Puget Sound Health Care System. The requirement for informed consent was waived.

## Selection of the SARS-CoV-2–positive cohort

We identified all enrollees with one or more positive nasal swabs for SARS-CoV-2 between March 1, 2020, and March 10, 2021. The index date was defined as the date the first positive test was performed. Most tests were performed in VA laboratories using US Food and Drug Administration (FDA)–approved RealTime (Abbott Laboratories) or Xpert-Xpress (Cepheid) SARS-CoV-2 assays. A small number were sent to outside laboratories.

## Selection of the SARS-CoV-2–negative cohort

Individuals without a positive nasal swab for SARS-CoV-2 and with any clinical lab test available in the medical record between March 1, 2020, and March 31, 2021, were chosen as a comparison group. A negative nasal swab for SARS-CoV-2 was not required for inclusion. Participants without a positive nasal swab for SARS-CoV-2 were assigned an index month during the study period for which they had a lab result, and a random index date during the index month which was used as the start of follow-up.

## Exposure

Current statin use was defined as receipt of a statin prescription with a fill date prior to the index date and a quantity prescribed that would extend past the index date. Statin intensity was defined as low, moderate, or high using definitions from the American Heart Association/American College of Cardiology guidelines on management of cholesterol<sup>9</sup> and was calculated based on the specific statin and dosage prescribed. Prescribing data were available for the following specific statins: Atorvastatin, fluvastatin, lovastatin,

1 pitavastatin, pravastatin, rosuvastatin, simvastatin. We defined prior statin use as receipt of a statin  
2 prescription with a fill date that included the time period six months prior to the index date.  
3  
4  
5

## 6 **Covariates**

8 We collected data on age, sex, race/ethnicity, VHA facility location, and urban, rural, or highly rural residence  
9 using a validated classification scheme that has been previously described<sup>10</sup>. Body mass index (BMI) was  
10 defined as weight in kg divided by (height in meters)<sup>2</sup>. Smoking status was classified as current, former, or  
11 never based on VHA health factors data. If no smoking code was entered, the participant was classified as  
12 never smoked. At-risk drinking was defined using a score  $\geq 3$  for men and  $\geq 4$  for women on the Alcohol Use  
13 Disorders Identification Test consumption questions (AUDIT-C)<sup>11</sup>. Comorbidities (hypertension (HTN), CVD,  
14 and heart failure) were identified using ICD-9-CM and -10 codes entered after October 1, 1999, the date when  
15 VHA began using a universal electronic health record<sup>12</sup>. We defined chronic kidney disease (CKD) by  
16 categories of estimated glomerular filtration rate<sup>13</sup> using the most recent creatinine at least 3 days, but not  
17 more than 1 year, before the index date. For individuals with data available on CRP at least 14 days but not  
18 more than six months before the index date (n=27,630), we dichotomized CRP values as normal or elevated  
19 based on cut points provided for each assay at the testing site because a variety of assays for these  
20 biomarkers are used across the VA system.  
21  
22  
23  
24  
25  
26  
27  
28  
29  
30  
31  
32  
33  
34  
35  
36  
37

## 38 **Outcomes**

40 In both groups, we collected data on 30-day hospitalizations, ICU admissions, and deaths occurring through  
41 March 10, 2021. Deaths were verified by official sources including VHA Patient Treatment File, the Beneficiary  
42 Identification Records Locator Subsystem (BIRLS), and VA/CMS Medicare Vital Status File; Social Security  
43 Administration (SSA) Death Master File; death certificates, and VHA National Cemetery Administration<sup>14</sup>.  
44  
45  
46  
47  
48  
49  
50

## 51 **Statistical analyses**

53 We summarized baseline characteristics for SARS-CoV-2 infected and uninfected participants, stratified by  
54 statin use at the index date. We used multiple imputation with 10 sets of imputations for analyses that included  
55 BMI or CKD due to approximately 20% missing values for each of these variables. We used DAGitty<sup>15</sup> to  
56  
57  
58  
59  
60

1 generate a directed acyclic graph (DAG) to assist in variable selection. We fit separate logistic regression  
2 models for individuals with and without a positive swab for SARS-CoV-2, testing the association of statin use at  
3 index date with occurrence of hospitalization, ICU admission, and death, adjusting for the minimal sufficient  
4 covariate set to estimate the total effect of statin use according to our DAG (statin use  $\geq$  six months prior to  
5 diagnosis, sex, age, race/ethnicity, BMI, tobacco use, facility location, index month, urban/rural status, eGFR,  
6 and history of diabetes, hypertension, cardiovascular disease, heart failure, and alcohol use disorder)  
7 separately. Index month was included as a precision variable. Facility location was included because both  
8 patterns of statin use and COVID-19 outcomes are expected to differ by region in the US. In combined models,  
9 we tested for the presence of multiplicative first-order interactions to determine whether the association  
10 between statins and odds of hospitalization, ICU admission, and death at 30 days differed between persons  
11 with and without a positive swab for SARS-CoV-2. We also controlled for prior statin use to approximate a  
12 comparison of incident users and non-users. In a sensitivity analysis, we examined associations of statin use  
13 at diagnosis with occurrence of hospitalization, ICU admission, and death in models that were not adjusted for  
14 statin use six months prior to diagnosis.

15  
16  
17  
18  
19  
20  
21  
22  
23  
24  
25  
26  
27  
28  
29  
30  
31  
32 Among individuals with a positive swab for SARS-CoV-2, we fit logistic regression models examining  
33 associations of specific statins compared to no statin use with outcomes adjusted for sex, age, race/ethnicity,  
34 BMI, tobacco use, facility location, urban/rural status, eGFR, and history of diabetes, hypertension,  
35 cardiovascular disease, heart failure, and alcohol use disorder, as well as models comparing low-intensity to  
36 moderate- or high-intensity statin use. We evaluated the magnitude of the statin-mortality association in strata  
37 of sex, age, race, BMI, clinical comorbidities, and prior CRP concentration and tested for first-order  
38 multiplicative interactions by using interaction terms in combined models.

### 49 **Patient and public involvement**

50  
51 Patients or the public were not involved in the design, or conduct, or reporting, or dissemination plans of our  
52 research.

## 57 **RESULTS**

SARS-CoV-2 infected participants were 60.9 years old ( $\pm 16.5$ ) on average, and 10% percent ( $n = 23,974$ ) were female. Thirty percent (69,263) had an active statin prescription at enrollment. During the 30 days after diagnosis, 14% (32,490) of SARS-CoV-2 infected participants were hospitalized, 3% (6,140) were admitted to the ICU, and 5% (12,111) died. SARS-COV-2 uninfected participants were 61.6 years old ( $\pm 16.7$ ) on average, and 13% (577,718) were female. Thirty percent (1,389,364) had an active statin prescription at enrollment. During the 30 days after the index date, 2% (91,604) were hospitalized, 0.2% (9,298) were admitted to the ICU, and 0.4% died ( $n = 19,298$ ). Statin users were more likely to be of white race/ethnicity, have BMI of 30 kg/m<sup>2</sup> or greater, be former smokers, and reside in a rural zip code regardless of SARS-CoV-2 test result. Not surprisingly, statin use was higher among cardiometabolic conditions but lower in alcohol use disorder. A higher proportion of statin users were receiving hi potency therapy among participants testing positive for SARS-CoV-2 (**Table 1**).

Among SARS-COV-2 positive individuals, statin use was associated with lower odds of death at 30 days (OR 0.81 [95%CI 0.77–0.85]), but not with hospitalization or ICU admission. Adjustment for receipt of statin six months prior to baseline attenuated the magnitude of the association of statin use at diagnosis with all outcomes (**Fig. 1, Tables 2a and 2b**) Associations with outcomes were similar for individual statins (**Table 3**). Compared to low-/moderate-intensity, high-intensity statin use was associated with higher odds of hospitalization (1.06 [95%CI 1.01–1.10]) but not with ICU admission or death (**Table 4**). Associations of statin use with hospitalization differed across strata of sex, age, race (Black vs. non-Black), and eGFR (e.g., OR for hospitalization in Black participants 0.98 [95%CI 0.92–1.03], OR for hospitalization in non-Black participants 0.92 [95%CI 0.89–0.95],  $p$  for interaction = 0.022). Associations of statin use with ICU admission differed across strata of sex and ethnicity (Latinx vs. not Latinx) (e.g., OR for ICU admission in Latinx participants 0.77 [95%CI 0.62–0.95], OR for ICU admission in non-Latinx participants 0.94 [95%CI 0.89–1.00],  $p$  for interaction = 0.044). Associations of statin use with mortality differed across strata of age, race/ethnicity (white vs. non-white and Black vs. non-Black), and BMI (e.g., OR for mortality in Black participants 0.83 [95%CI 0.76–0.92], OR for mortality in non-Black participants 0.77 [95%CI 0.74–0.81],  $p$  for interaction = 0.006). Associations did not differ across strata of prevalent diabetes, hypertension, or CVD (**Supplementary Fig. 1–3**).



1 Compared to persons with SARS-CoV-2 infection, OR for all three outcomes were significantly lower in  
2 persons without SARS-CoV-2 infection, as reflected by  $p < 0.001$  for the interaction term of SARS-CoV-2\*statin  
3 use in all three models. Among SARS-COV-2 negative individuals, statin use was associated with lower odds  
4 of hospitalization (OR 0.79 [95%CI 0.77–0.80]), ICU admission (OR 0.86 [95%CI 0.81–0.90]), and death at 30  
5 days (OR 0.60 [95%CI 0.58–0.62]). (Table 2a).  
6  
7  
8  
9

## 10 11 12 13 14 **DISCUSSION**

15  
16 In this cohort of U.S. Veterans with ( $n=231,154$ ) and without ( $n=4,570,252$ ) a positive respiratory swab for  
17 SARS-CoV-2, statin use was independently associated with lower odds of death at 30 days compared to no  
18 statin use, but this association over a similar time period was significantly stronger among Veterans without a  
19 positive respiratory swab for SARS-CoV-2. Among individuals with and without a positive respiratory swab for  
20 SARS-CoV-2, adjusting for prior statin use attenuated the association of statin use with all outcomes; however,  
21 in every case the magnitude of the association remained substantially greater among individuals without a  
22 diagnosis of COVID-19. Associations were similar for specific statins, and receipt of high-potency statin was  
23 not associated with lower odds of any outcome compared to moderate and low potency, except for a small  
24 difference in the odds of hospitalization. Associations were not significantly different in strata of prevalent  
25 diabetes, hypertension, or cardiovascular disease. Furthermore, the lack of a gradient of effect with statin  
26 potency also does not support a potential causal benefit of statin use. Taken together, these results suggest  
27 that while statin use is associated with lower mortality among individuals with a positive swab for SARS-CoV-2,  
28 the benefit is actually smaller for than it is for those without evidence of SARS-CoV-2 infection and does not  
29 support a possible anti-COVID effect of statin treatment. It is important to note, however, that the current study  
30 does not demonstrate a harmful effect of statin use among individuals with COVID-19, only that statins may not  
31 exert a SARS-CoV-2-specific protective effect and/or that positive findings in previous observational studies  
32 may be due to residual confounding. Current findings therefore do not support statin cessation among  
33 individuals with COVID-19.  
34  
35  
36  
37  
38  
39  
40  
41  
42  
43  
44  
45  
46  
47  
48  
49  
50  
51  
52  
53  
54  
55

56 Use of negative controls is an important technique to detect confounding or other sources of bias in  
57 epidemiological studies<sup>16</sup> that has gone underutilized in the era of COVID-19 research. An instructive example  
58  
59

1 is the association of pneumonia or influenza vaccination with all-cause mortality seen in elderly individuals  
2 despite rigorous control for confounding by factors related to overall health status<sup>17</sup>. Using negative controls,  
3 Jackson et al. examined the association of vaccination with a negative control outcome: mortality prior to  
4 influenza season<sup>18</sup>. They found a stronger association with mortality during the period prior to influenza season  
5 compared to during or after, a biologically implausible result that was attributed by the authors to preferential  
6 receipt of vaccines by healthy individuals. This source of bias is now recognized in studies of this topic<sup>19</sup>. While  
7 the use of a negative control outcome is not precisely analogous to the methods used in the current study, the  
8 example can inform interpretation of the current findings.  
9

10  
11  
12  
13  
14  
15  
16  
17  
18  
19 Several recent systematic reviews and meta-analyses have examined the association of prior statin use with  
20 short-term outcomes after COVID-19<sup>20-25</sup>. Many of these reported an inverse association of statin use at  
21 diagnosis with mortality. For example, statin use was associated with a lower hazard of death (HR 0.72 [95%CI  
22 0.69–0.75]) in a large population-based study of English patients with diabetes independent of age and co-  
23 morbid CVD<sup>26</sup>. In a recent nationwide U.S. study of hospitalized individuals (n=10,541), outpatient statin, either  
24 alone or with blood pressure-lowering medications, was associated with lower odds of in-hospital death (OR  
25 0.59 [95%CI 0.50–0.69]). The magnitude of the association of statin use at diagnosis with mortality reported in  
26 these and other analyses is quite similar to the OR in the current report among individuals with COVID-19 in  
27 models that were not adjusted for prior statin use (OR for death at 30 days 0.78 [95% CI 0.75–0.82]), likely  
28 reflecting similar strategies for confounder adjustment. The lower COVID-19 mortality risk among statin users,  
29 however, is not a universal finding. In fact, among French hospitalized patients with diabetes, statin use at  
30 diagnosis was associated with higher odds of death at 28 days (OR 1.46 [95% CI 1.08–1.95])<sup>27</sup>. Reasons for  
31 these disparate findings are unclear but may be due in part to differences in timing, as early in the pandemic,  
32 treatments such as dexamethasone and remdesivir were not widely used. Consistent with this, in the French  
33 cohort mortality was about 21% at 28 days, considerably higher than our overall 30-day mortality rate of about  
34 7%. No prior study to our knowledge has examined outcomes following statin use comparing SARS-CoV-2  
35 infected and uninfected statin users.  
36  
37  
38  
39  
40  
41  
42  
43  
44  
45  
46  
47  
48  
49  
50  
51  
52  
53  
54  
55  
56  
57  
58  
59  
60

1 We did not examine in-hospital statin continuation in the current analysis—a question which remains  
2 unaddressed—but instead focused on the association between statin use prior to COVID diagnosis and  
3 outcomes, where use of this medication would not have been confounded by the onset of COVID.  
4  
5 Methodological issues (most importantly residual confounding by indication and heterogeneity of the  
6  
7 populations studied) limit the conclusions that can be drawn from earlier observational studies of statin  
8  
9 continuation at hospitalization. Masana et al. examined associations of statin use with in-hospital mortality in a  
10  
11 cohort of hospitalized Spanish patients with a positive test for SARS-CoV-2<sup>28</sup> comparing statin non-users,  
12  
13 users who continued statins during hospitalization, and users who stopped statins during hospitalization.  
14  
15 Overall, 25.7% of non-users died, while 19.8% of continued users died, and 17.4% of stoppers died. In that  
16  
17 analysis, matching was used to account for differences in pre-admission characteristics; however, the authors  
18  
19 were not able to account for characteristics (e.g., severity of COVID-19 illness, perceived prognosis, goals of  
20  
21 care, etc.) that might impact the decision to stop statin therapy at the time of admission. In a meta-analysis,  
22  
23 Permana et al. examined associations of pre-admission statin use and in-hospital statin use among patients  
24  
25 hospitalized after a positive test for SARS-CoV-2<sup>21</sup>, which is a related question. In-hospital but not pre-  
26  
27 admission statin use was associated with a lower risk of mortality; however, these pre-admission and in-  
28  
29 hospital study populations differed in characteristics such as age and sex that are strongly associated with  
30  
31 adverse COVID-19 outcomes, limiting direct comparisons between the groups. Given the many possible  
32  
33 determinants of statin cessation or continuation following the diagnosis of COVID-19 potentially related to  
34  
35 adverse outcomes that would be difficult to extract from medical records (electronic or otherwise), the question  
36  
37 of whether to cease or initiate statins following COVID diagnosis will be best determined by a clinical trial.  
38  
39  
40  
41  
42  
43  
44 We noted several differences in outcomes associated with statin use by certain characteristics such as sex,  
45  
46 age, and race (Supplementary Fig. 1-3). As our main analysis did not show evidence of a lower risk of  
47  
48 outcomes associated with statin use confined to COVID-19 infected participants, these interactions likely  
49  
50 reflect associations independent of presence of this infection and therefore reflecting effect modification  
51  
52 between statin use, stratum variables, and outcomes of interest.  
53  
54  
55  
56  
57  
58  
59  
60

1 Our study has several strengths, most importantly a large, well characterized national sample. To our  
2 knowledge, this is the largest observational study of prior statin use and adverse outcomes from SARS-CoV-2  
3 in the United States (n=4,801,406) as well as the first to formally assess and compare statin effects seen in  
4 SARS-CoV-2 infection using a negative control (non-infected statin users). Second, we used several methods  
5 designed to mitigate or quantify bias due to unmeasured confounding. We: 1) constructed a DAG to estimate  
6 the minimal sufficient adjustment set to estimate the total effect of statin use on 30-day outcomes; 2) compared  
7 associations in SARS-CoV-2 infected individuals and an uninfected comparator sample; and 3) conducted  
8 dose-response analyses using statin potency to reflect dose. In addition, most VHA enrollees receive medical  
9 care and medications without cost, which likely decreases the contribution of unmeasured financial factors to  
10 differences in the quality of care received and most importantly to receipt of statin medications. Our results  
11 should be considered within the context of several limitations. The VHA population is generally older, with  
12 lower income and socioeconomic status<sup>29</sup> than the U.S. population as a whole, and our findings may not be  
13 generalizable to non-VHA populations. Additionally, the proportion of women was low (13%); however,  
14 although women comprised only a small proportion of the sample, the number of female participants  
15 (n=601,765) is adequate for robust statistical inference. We were also unable to capture hospitalizations or  
16 some outpatient prescriptions that occurred outside VHA. This is an important source of potential bias should  
17 propensity to seek outside care be associated with likelihood of receiving a statin, although VHA users are  
18 asked to provide notification within 72 hours of an outside hospital admission, and when possible are  
19 transferred to a VHA facility, which would then be captured in the VHA electronic health record. Given the  
20 timing of this study, we were unable to evaluate mediating or moderating effects of vaccination use due to very  
21 limited vaccination coverage of our population by the index date. No data were available on prescription  
22 adherence; however, statin discontinuation rates have previously shown to be low in VHA patients relative to  
23 discontinuation of other lipid-lowering medications<sup>30</sup>. The comparison of all-cause mortality is in our opinion the  
24 best outcome by which to assess whether statin use benefitted patients with versus without SARS-CoV-2  
25 infection. The comparison of admission to hospital or ICU is of less value given that the reasons for  
26 hospitalization likely differed greatly by presence of infection, but, nevertheless, are of value in demonstrating  
27 that no apparent benefit is seen that might not be reflected in overall mortality. Finally, not all individuals in the  
28 comparator group were tested for SARS-CoV-2, so we were unable to exclude the possibility that some SARS-

1 CoV-2–positive participants with asymptomatic or mild disease were misclassified as SARS-CoV-2–negative.  
2 We elected to include individuals without SARS-CoV-2 tests because individuals with indications for SARS-  
3 CoV-2 testing may represent a particular (and sicker) population than the general group of VA enrollees as a  
4 whole. Further, based on the current results, inclusion of individuals with undiagnosed COVID-19 in the SARS-  
5 CoV-2–negative comparator group would be expected to attenuate observed differences in the associations of  
6 statin use with adverse outcomes between the SARS-CoV-2 infected and negative comparator groups. It is  
7 unlikely that exclusion of participants with undiagnosed COVID-19 from the comparator group would have  
8 resulted in a reduction in the observed negative association between statin use and mortality, as this would  
9 have required an opposite association to be present between undiagnosed COVID-19 infection and mortality, a  
10 possibility for which there is little reason or evidence to support.  
11  
12  
13  
14  
15  
16  
17  
18  
19  
20  
21  
22

## 23 **CONCLUSIONS**

24 In conclusion, statin use is associated with lower odds of 30-day mortality both among U.S. Veterans with or  
25 without a positive respiratory swab for SARS-CoV-2 indicating that statins may not exert COVID-19-specific  
26 beneficial effects.  
27  
28  
29  
30  
31  
32  
33

34 **FUNDING.** The work was funded by VA Clinical Science Research & Development (COVID19-8990-19). The  
35 funder had no role in the study design, conduct, analysis, or reporting.  
36  
37  
38  
39

40 **COMPETING INTERESTS.** There are no relevant conflicts of interest to disclose.  
41  
42  
43

44 **DATA AVAILABILITY STATEMENT.** Access to VA electronic health records data is limited to researchers  
45 with active, VA appointments and an IRB-approved protocol.  
46  
47  
48  
49

50 **CONTRIBUTORSHIP.** PLW conceived the project, designed the overall research plan, and wrote the first draft  
51 of the manuscript. EL analyzed the data and reviewed/edited the manuscript, LB contributed to the conception  
52 of the work and reviewed/edited the manuscript, LTP contributed to the conception of the work and  
53 reviewed/edited the manuscript, AK contributed to design/interpretation of the analyses and reviewed/edited  
54  
55  
56  
57  
58  
59

1 the manuscript, AP contributed to the design/interpretation of the analyses and reviewed/edited the  
2 manuscript. SEK contributed to the conception of the work and reviewed/edited the manuscript. GD contributed  
3 to the design/interpretation of the analyses and reviewed/edited the manuscript. EJB conceived the project,  
4 designed the overall research plan, and reviewed/edited the manuscript.  
5  
6  
7  
8  
9

10 **LICENCE.** The Corresponding Author has the right to grant on behalf of all authors and does grant on behalf of  
11 all authors, [a worldwide licence](#) to the Publishers and its licensees in perpetuity, in all forms, formats and  
12 media (whether known now or created in the future), to i) publish, reproduce, distribute, display and store the  
13 Contribution, ii) translate the Contribution into other languages, create adaptations, reprints, include within  
14 collections and create summaries, extracts and/or, abstracts of the Contribution, iii) create any other derivative  
15 work(s) based on the Contribution, iv) to exploit all subsidiary rights in the Contribution, v) the inclusion of  
16 electronic links from the Contribution to third party material where-ever it may be located; and, vi) licence any  
17 third party to do any or all of the above.  
18  
19  
20  
21  
22  
23  
24  
25  
26  
27  
28  
29

30 **ETHICS STATEMENT.** The study was approved by the institutional review board at VA Puget Sound Health  
31 Care System, Seattle, WA, USA (#01897). The requirement for informed consent was waived.  
32  
33  
34  
35  
36  
37  
38  
39

## 40 REFERENCES

- 41 1. Daniels LB, Ren J, Kumar K, et al. Relation of prior statin and anti-hypertensive use to severity of disease  
42 among patients hospitalized with COVID-19: Findings from the American Heart Association's COVID-  
43 19 Cardiovascular Disease Registry. *PLoS one* 2021;16(7):e0254635. doi:  
44 10.1371/journal.pone.0254635 [published Online First: 2021/07/16]
- 45 2. Pal R, Banerjee M, Yadav U, et al. Statin use and clinical outcomes in patients with COVID-19: An updated  
46 systematic review and meta-analysis. *Postgraduate medical journal* 2021 doi: 10.1136/postgradmedj-  
47 2020-139172 [published Online First: 2021/02/06]
- 48 3. Castiglione V, Chiriaco M, Emdin M, et al. Statin therapy in COVID-19 infection. *Eur Heart J Cardiovasc*  
49 *Pharmacother* 2020;6(4):258-59. doi: 10.1093/ehjcvp/pvaa042 [published Online First: 2020/04/30]
- 50 4. Butt JH, Gerds TA, Schou M, et al. Association between statin use and outcomes in patients with  
51 coronavirus disease 2019 (COVID-19): a nationwide cohort study. *BMJ Open* 2020;10(12):e044421.  
52 doi: 10.1136/bmjopen-2020-044421 [published Online First: 2020/12/06]
- 53 5. Yetmar ZA, Challener DW, Tleyjeh IM, et al. Association Between Chronic Statin Use and 30-Day Mortality  
54 in Hospitalized Patients With COVID-19. *Mayo Clin Proc Innov Qual Outcomes* 2021;5(2):442-46. doi:  
55 10.1016/j.mayocpiqo.2021.02.002 [published Online First: 2021/03/23]
- 56 6. Rubin R. Could Statins Do More Than Lower Cholesterol in Patients With COVID-19? *JAMA : the journal of*  
57 *the American Medical Association* 2021 doi: 10.1001/jama.2021.8201 [published Online First:  
58 2021/06/04]  
59

- 1 7. U.S. Department of Veterans Affairs: VHA [Available from: <https://www.va.gov/health/> accessed 9/28/2020  
2020.
- 2 8. CDW COVID-19 Shared Data Resource (intranet-only resource) [Available from:  
3 [https://vhacdwdwhweb100.vha.med.va.gov/phenotype/index.php/COVID-19:Shared\\_Data\\_Resource](https://vhacdwdwhweb100.vha.med.va.gov/phenotype/index.php/COVID-19:Shared_Data_Resource)  
4 accessed 9/28/2020 2020.
- 5 9. Grundy SM, Stone NJ, Bailey AL, et al. 2018  
6 AHA/ACC/AACVPR/AAPA/ABC/ACPM/ADA/AGS/APhA/ASPC/NLA/PCNA Guideline on the  
7 Management of Blood Cholesterol: A Report of the American College of Cardiology/American Heart  
8 Association Task Force on Clinical Practice Guidelines. *Circulation* 2019;139(25):e1082-e143. doi:  
9 10.1161/CIR.0000000000000625 [published Online First: 2018/12/28]
- 10 10. West AN, Lee RE, Shambaugh-Miller MD, et al. Defining "rural" for veterans' health care planning. *The*  
11 *Journal of rural health : official journal of the American Rural Health Association and the National Rural*  
12 *Health Care Association* 2010;26(4):301-9. doi: 10.1111/j.1748-0361.2010.00298.x [published Online  
13 First: 2010/10/30]
- 14 11. Bush K, Kivlahan DR, McDonnell MB, et al. The AUDIT alcohol consumption questions (AUDIT-C): an  
15 effective brief screening test for problem drinking. Ambulatory Care Quality Improvement Project  
16 (ACQUIP). Alcohol Use Disorders Identification Test. *Archives of internal medicine* 1998;158(16):1789-  
17 95. doi: 10.1001/archinte.158.16.1789 [published Online First: 1998/09/17]
- 18 12. Quan H, Sundararajan V, Halfon P, et al. Coding algorithms for defining comorbidities in ICD-9-CM and  
19 ICD-10 administrative data. *Medical care* 2005;43(11):1130-9. doi:  
20 10.1097/01.mlr.0000182534.19832.83 [published Online First: 2005/10/15]
- 21 13. Young BA, Katz R, Boulware LE, et al. Risk Factors for Rapid Kidney Function Decline Among African  
22 Americans: The Jackson Heart Study (JHS). *American journal of kidney diseases : the official journal of*  
23 *the National Kidney Foundation* 2016;68(2):229-39. doi: 10.1053/j.ajkd.2016.02.046 [published Online  
24 First: 2016/04/14]
- 25 14. Sohn MW, Arnold N, Maynard C, et al. Accuracy and completeness of mortality data in the Department of  
26 Veterans Affairs. *Popul Health Metr* 2006;4:2. doi: 10.1186/1478-7954-4-2 [published Online First:  
27 2006/04/12]
- 28 15. Textor J, van der Zander B, Gilthorpe MS, et al. Robust causal inference using directed acyclic graphs: the  
29 R package 'dagitty'. *International journal of epidemiology* 2016;45(6):1887-94. doi: 10.1093/ije/dyw341  
30 [published Online First: 2017/01/17]
- 31 16. Lipsitch M, Tchetgen Tchetgen E, Cohen T. Negative controls: a tool for detecting confounding and bias in  
32 observational studies. *Epidemiology* 2010;21(3):383-8. doi: 10.1097/EDE.0b013e3181d61eeb  
33 [published Online First: 2010/03/26]
- 34 17. Rivetti D, Jefferson T, Thomas R, et al. Vaccines for preventing influenza in the elderly. *Cochrane*  
35 *Database Syst Rev* 2006(3):CD004876. doi: 10.1002/14651858.CD004876.pub2 [published Online  
36 First: 2006/07/21]
- 37 18. Jackson LA, Jackson ML, Nelson JC, et al. Evidence of bias in estimates of influenza vaccine effectiveness  
38 in seniors. *International journal of epidemiology* 2006;35(2):337-44. doi: 10.1093/ije/dyi274 [published  
39 Online First: 2005/12/22]
- 40 19. Levett-Jones T. Vaccines for preventing influenza in the elderly: A Cochrane review summary. *International*  
41 *journal of nursing studies* 2020;109:103372. doi: 10.1016/j.ijnurstu.2019.06.003 [published Online First:  
42 2019/06/23]
- 43 20. Hariyanto TI, Kurniawan A. Statin and outcomes of coronavirus disease 2019 (COVID-19): A systematic  
44 review, meta-analysis, and meta-regression. *Nutrition, metabolism, and cardiovascular diseases : NMCD*  
45 *2021;31(6):1662-70. doi: 10.1016/j.numecd.2021.02.020 [published Online First: 2021/04/12]*
- 46 21. Permana H, Huang I, Purwiga A, et al. In-hospital use of statins is associated with a reduced risk of  
47 mortality in coronavirus-2019 (COVID-19): systematic review and meta-analysis. *Pharmacol Rep*  
48 *2021;73(3):769-80. doi: 10.1007/s43440-021-00233-3 [published Online First: 2021/02/21]*
- 49 22. Hariyanto TI, Kurniawan A. Statin therapy did not improve the in-hospital outcome of coronavirus disease  
50 2019 (COVID-19) infection. *Diabetes Metab Syndr* 2020;14(6):1613-15. doi: 10.1016/j.dsx.2020.08.023  
51 [published Online First: 2020/09/04]
- 52 23. Wu KS, Lin PC, Chen YS, et al. The use of statins was associated with reduced COVID-19 mortality: a  
53 systematic review and meta-analysis. *Annals of medicine* 2021;53(1):874-84. doi:  
54 10.1080/07853890.2021.1933165 [published Online First: 2021/06/08]

- 1 24. Vahedian-Azimi A, Mohammadi SM, Heidari Beni F, et al. Improved COVID-19 ICU admission and  
2 mortality outcomes following treatment with statins: a systematic review and meta-analysis. *Arch Med*  
3 *Sci* 2021;17(3):579-95. doi: 10.5114/aoms/132950 [published Online First: 2021/05/25]
- 4 25. Onorato D, Pucci M, Carpena G, et al. Protective Effects of Statins Administration in European and North  
5 American Patients Infected with COVID-19: A Meta-Analysis. *Semin Thromb Hemost* 2021;47(4):392-  
6 99. doi: 10.1055/s-0040-1722307 [published Online First: 2021/01/23]
- 7 26. Holman N, Knighton P, Kar P, et al. Risk factors for COVID-19-related mortality in people with type 1 and  
8 type 2 diabetes in England: a population-based cohort study. *Lancet Diabetes Endocrinol*  
9 2020;8(10):823-33. doi: 10.1016/S2213-8587(20)30271-0 [published Online First: 2020/08/18]
- 10 27. Cariou B, Goronflot T, Rimbert A, et al. Routine use of statins and increased mortality related to COVID-19  
11 in inpatients with type 2 diabetes: Results from the CORONADO study. *Diabetes & metabolism* 2020  
12 doi: 10.1016/j.diabet.2020.10.001 [published Online First: 2020/10/23]
- 13 28. Masana L, Correig E, Rodriguez-Borjabad C, et al. EFFECT OF STATIN THERAPY ON SARS-CoV-2  
14 INFECTION-RELATED. *Eur Heart J Cardiovasc Pharmacother* 2020 doi: 10.1093/ehjcvp/pvaa128  
15 [published Online First: 2020/11/03]
- 16 29. Kondo K, Low A, Everson T, et al. Health Disparities in Veterans: A Map of the Evidence. *Medical care*  
17 2017;55 Suppl 9 Suppl 2:S9-S15. doi: 10.1097/MLR.0000000000000756 [published Online First:  
18 2017/08/15]
- 19 30. Hiatt JG, Shamsie SG, Schectman G. Discontinuation rates of cholesterol-lowering medications:  
20 implications for primary care. *The American journal of managed care* 1999;5(4):437-44. [published  
21 Online First: 1999/07/01]
- 22
- 23
- 24
- 25
- 26
- 27
- 28
- 29
- 30
- 31
- 32
- 33
- 34
- 35
- 36
- 37
- 38
- 39
- 40
- 41
- 42
- 43
- 44
- 45
- 46
- 47
- 48
- 49
- 50
- 51
- 52
- 53
- 54
- 55
- 56
- 57
- 58
- 59
- 60



**Table 1.** Characteristics of VHA Veterans with and without a positive respiratory swab for SARS-CoV-2 (March 1, 2020–March 10, 2021), stratified by presence of an active statin prescription at enrollment

|                                                                  | Overall     |       | No positive respiratory swab for SARS-CoV-2 |       |                                           |       | ≥1 positive respiratory swab for SARS-CoV-2 |       |                                        |       |
|------------------------------------------------------------------|-------------|-------|---------------------------------------------|-------|-------------------------------------------|-------|---------------------------------------------|-------|----------------------------------------|-------|
|                                                                  | n=4,801,406 |       | No statin prescription<br>n=3,180,888       |       | Active statin prescription<br>n=1,389,364 |       | No statin prescription<br>n=161,891         |       | Active statin prescription<br>n=69,263 |       |
| Age, years                                                       | 61.6        | ±16.7 | 58.3                                        | ±17.7 | 69.3                                      | ±10.8 | 57.8                                        | ±17.5 | 68.0                                   | ±11.4 |
| Age category, years                                              |             |       |                                             |       |                                           |       |                                             |       |                                        |       |
| 19-39                                                            | 661,777     | 14%   | 613,885                                     | 19%   | 15,272                                    | 1%    | 31,645                                      | 20%   | 975                                    | 1%    |
| 40-49                                                            | 482,871     | 10%   | 402,201                                     | 13%   | 54,467                                    | 4%    | 22,718                                      | 14%   | 3,485                                  | 5%    |
| 50-59                                                            | 728,340     | 15%   | 516,328                                     | 16%   | 172,006                                   | 12%   | 29,099                                      | 18%   | 10,907                                 | 16%   |
| 60-69                                                            | 993,105     | 21%   | 600,530                                     | 19%   | 346,361                                   | 25%   | 28,785                                      | 18%   | 17,429                                 | 25%   |
| 70-79                                                            | 1,408,065   | 29%   | 735,949                                     | 23%   | 610,855                                   | 44%   | 33,303                                      | 21%   | 27,958                                 | 40%   |
| 80+                                                              | 525,548     | 11%   | 311,010                                     | 10%   | 189,825                                   | 14%   | 16,204                                      | 10%   | 8,509                                  | 12%   |
| Sex at birth, female                                             | 601,692     | 13%   | 509,443                                     | 16%   | 68,275                                    | 5%    | 20,598                                      | 13%   | 3,376                                  | 5%    |
| Race/ethnicity                                                   |             |       |                                             |       |                                           |       |                                             |       |                                        |       |
| White                                                            | 3,335,105   | 69%   | 2,122,989                                   | 67%   | 1,055,742                                 | 76%   | 106,448                                     | 66%   | 49,926                                 | 72%   |
| Black                                                            | 860,829     | 18%   | 582,091                                     | 18%   | 226,384                                   | 16%   | 38,080                                      | 24%   | 14,274                                 | 21%   |
| Hispanic                                                         | 333,593     | 7%    | 230,848                                     | 7%    | 79,866                                    | 6%    | 17,770                                      | 11%   | 5,109                                  | 7%    |
| Other                                                            | 542,562     | 11%   | 430,377                                     | 14%   | 94,575                                    | 7%    | 13,410                                      | 8%    | 4,200                                  | 6%    |
| Body-mass index, kg/m <sup>2</sup>                               | 30.2        | ±6.09 | 29.8                                        | ±6.04 | 30.8                                      | ±6.06 | 30.9                                        | ±6.35 | 31.9                                   | ±6.26 |
| Body-mass index category, kg/m <sup>2</sup>                      |             |       |                                             |       |                                           |       |                                             |       |                                        |       |
| <18.5                                                            | 28,116      | 1%    | 20,717                                      | 1%    | 6,230                                     | 1%    | 951                                         | 1%    | 218                                    | 0%    |
| 18.5-24.9                                                        | 553,988     | 17%   | 379,204                                     | 20%   | 152,657                                   | 14%   | 16,249                                      | 15%   | 5,878                                  | 11%   |
| 25-29.9                                                          | 1,107,238   | 35%   | 687,781                                     | 36%   | 367,799                                   | 34%   | 34,949                                      | 32%   | 16,709                                 | 30%   |
| 30-34.9                                                          | 869,628     | 27%   | 507,893                                     | 26%   | 313,277                                   | 29%   | 30,944                                      | 29%   | 17,514                                 | 32%   |
| 35-39.9                                                          | 399,754     | 13%   | 224,651                                     | 12%   | 149,833                                   | 14%   | 15,734                                      | 15%   | 9,536                                  | 17%   |
| ≥ 40                                                             | 208,950     | 7%    | 113,491                                     | 6%    | 80,708                                    | 8%    | 9,077                                       | 8%    | 5,674                                  | 10%   |
| Active statin prescription six months prior to enrollment        | 1,375,009   | 29%   | 259,070                                     | 8%    | 1,046,850                                 | 75%   | 17,020                                      | 11%   | 52,069                                 | 75%   |
| Never                                                            | 1,747,387   | 36%   | 1,338,452                                   | 42%   | 328,440                                   | 24%   | 62,782                                      | 39%   | 17,713                                 | 26%   |
| Former                                                           | 1,729,275   | 36%   | 984,318                                     | 31%   | 651,438                                   | 47%   | 58,321                                      | 36%   | 35,198                                 | 51%   |
| Current                                                          | 1,323,044   | 28%   | 857,133                                     | 27%   | 408,908                                   | 29%   | 40,651                                      | 25%   | 16,352                                 | 24%   |
| Urban/rural/highly rural ZIP code                                |             |       |                                             |       |                                           |       |                                             |       |                                        |       |
| Highly rural                                                     | 57,047      | 1%    | 34,211                                      | 1%    | 20,620                                    | 1%    | 1,360                                       | 1%    | 856                                    | 1%    |
| Rural                                                            | 1,561,076   | 33%   | 975,607                                     | 31%   | 518,394                                   | 37%   | 43,690                                      | 27%   | 23,385                                 | 34%   |
| Urban                                                            | 3,172,176   | 66%   | 2,163,063                                   | 68%   | 847,474                                   | 61%   | 116,643                                     | 72%   | 44,996                                 | 65%   |
| Unknown                                                          | 9,407       | 0%    | 7,022                                       | 0%    | 2,298                                     | 0%    | 61                                          | 0%    | 26                                     | 0%    |
| Estimated glomerular filtration rate, ml/min/1.73 m <sup>2</sup> |             |       |                                             |       |                                           |       |                                             |       |                                        |       |
| ≥ 90                                                             | 938,310     | 27%   | 654,399                                     | 31%   | 235,893                                   | 20%   | 36,230                                      | 32%   | 11,788                                 | 19%   |
| 60-89                                                            | 1,718,393   | 49%   | 1,034,287                                   | 49%   | 599,357                                   | 50%   | 54,598                                      | 48%   | 30,151                                 | 48%   |
| 45-59                                                            | 520,635     | 15%   | 268,392                                     | 13%   | 226,556                                   | 19%   | 13,799                                      | 12%   | 11,888                                 | 19%   |
| 30-44                                                            | 212,116     | 6%    | 100,776                                     | 5%    | 100,175                                   | 8%    | 5,626                                       | 5%    | 5,539                                  | 9%    |
| 15-29                                                            | 58,464      | 2%    | 27,223                                      | 1%    | 27,527                                    | 2%    | 1,906                                       | 2%    | 1,808                                  | 3%    |
| <15 or dialysis                                                  | 25,765      | 1%    | 12,803                                      | 1%    | 10,449                                    | 1%    | 1,503                                       | 1%    | 1,010                                  | 2%    |

**Table 1 CONTINUED.** Characteristics of VHA Veterans with and without a positive respiratory swab for SARS-CoV-2 (March 1, 2020–March 10, 2021), stratified by presence of an active statin prescription at enrollment

|                                                     |           |       |           |       |           |       |         |       |        |       |
|-----------------------------------------------------|-----------|-------|-----------|-------|-----------|-------|---------|-------|--------|-------|
| Diabetes                                            | 1,482,197 | 31%   | 679,909   | 21%   | 716,920   | 52%   | 44,364  | 27%   | 41,004 | 59%   |
| Hypertension                                        | 2,874,378 | 60%   | 1,551,529 | 49%   | 1,176,398 | 85%   | 86,382  | 53%   | 60,069 | 87%   |
| Cardiovascular disease                              | 1,749,197 | 36%   | 857,912   | 27%   | 794,940   | 57%   | 53,635  | 33%   | 42,710 | 62%   |
| Heart failure                                       | 352,710   | 7%    | 144,971   | 5%    | 183,128   | 13%   | 12,388  | 8%    | 12,223 | 18%   |
| Alcohol use disorder                                | 909,010   | 19%   | 629,005   | 20%   | 238,333   | 17%   | 31,212  | 19%   | 10,460 | 15%   |
| Statin prescribed                                   |           |       |           |       |           |       |         |       |        |       |
| None                                                | 3,341,657 | 70%   | 3,179,903 | 100%  | 0         | 0%    | 161,754 | 100%  | 0      | 0%    |
| Atorvastatin                                        | 872,981   | 18%   |           |       | 829,795   | 60%   |         |       | 43,186 | 62%   |
| Fluvastatin                                         | 364       | <1%   |           |       | 348       | 0%    |         |       | 16     | 0%    |
| Lovastatin                                          | 15,375    | <1%   |           |       | 14,751    | 1%    |         |       | 624    | 1%    |
| Pitavastatin                                        | 801       | <1%   |           |       | 748       | <1%   |         |       | 53     | <1%   |
| Pravastatin                                         | 123,779   | 3%    |           |       | 118,039   | 8%    |         |       | 5,740  | 8%    |
| Rosuvastatin                                        | 173,943   | 4%    |           |       | 165,066   | 12%   |         |       | 8,877  | 13%   |
| Simvastatin                                         | 270,806   | 6%    |           |       | 260,039   | 19%   |         |       | 10,767 | 16%   |
| High-potency statin (vs. low- or moderate-potency)* | 616,824   | 42%   | 0         | <1%   | 585,224   | 42%   | 0       | <1%   | 31,600 | 46%   |
| Mean hsCRP in the prior six months, mg/L**          | 17.3      | ±136  | 16.4      | ±151  | 18.2      | ±120  | 19.9    | ±49.6 | 21.0   | ±52.9 |
| hsCRP in the prior six months ≥2 mg/L**             | 390,796   | 41%   | 217,408   | 40%   | 145,787   | 42%   | 17,407  | 44%   | 10,194 | 45%   |
| Mean hsCRP at or after the index date, mg/L***      | 29.3      | ±54.1 | 22.2      | ±46.6 | 25.6      | ±50.8 | 57.8    | ±70.8 | 65.2   | ±71.1 |
| hsCRP at or after the index date ≤2 mg/L***         | 125,178   | 52%   | 61,501    | 46%   | 34,630    | 49%   | 18,260  | 75%   | 10,787 | 79%   |
| <b>OUTCOMES</b>                                     |           |       |           |       |           |       |         |       |        |       |
| Hospital admission within 30 days                   | 124,094   | 3%    | 61,651    | 2%    | 29,953    | 2%    | 20,280  | 13%   | 12,210 | 18%   |
| ICU admission within 30 days                        | 15,438    | <1%   | 5,710     | <1%   | 3,588     | <1%   | 3,754   | 2%    | 2,386  | 3%    |
| Death w/in 30 days                                  | 31,409    | 1%    | 13,074    | <1%   | 6,224     | <1%   | 7,815   | 5%    | 4,296  | 6%    |

Data are presented as mean ± standard deviation (SD) for continuous variables and n (%) for categorical variables  
 p-values for global differences in participant characteristics across categories of COVID diagnosis and prior statin use all <0.001

\* based on estimated % LDL-c reduction

\*\* up to 14 days prior to index date (Overall n=958,343)

\*\*\* Overall n=224,930

**Table 2a.** Odds ratios from logistic regression models testing the association of active statin prescription at enrollment with adverse 30-day outcomes among VHA Veterans with and without a positive respiratory swab for SARS-CoV-2, including adjustment for prior statin use

|                                                                  | No positive swab, n=4,568,689 |       |        |               |       |        |       |       |        | ≥1 positive swab, n=231,017 |       |        |               |       |        |       |       |         |
|------------------------------------------------------------------|-------------------------------|-------|--------|---------------|-------|--------|-------|-------|--------|-----------------------------|-------|--------|---------------|-------|--------|-------|-------|---------|
|                                                                  | Hospital admission            |       |        | ICU admission |       |        | Death |       |        | Hospital admission          |       |        | ICU admission |       |        | Death |       |         |
|                                                                  | OR                            | 95%CI |        | OR            | 95%CI |        | OR    | 95%CI |        | OR                          | 95%CI |        | OR            | 95%CI |        | OR    | 95%CI |         |
| Active statin prescription at enrollment                         | 0.79                          | 0.77  | — 0.80 | 0.98          | 0.95  | — 1.01 | 0.86  | 0.81  | — 0.90 | 0.94                        | 0.88  | — 1.01 | 0.60          | 0.58  | — 0.62 | 0.81  | 0.77  | — 0.85  |
| Statin prescription six months prior to enrollment               | 0.91                          | 0.89  | — 0.93 | 0.93          | 0.90  | — 0.96 | 0.88  | 0.83  | — 0.93 | 0.97                        | 0.91  | — 1.04 | 0.93          | 0.90  | — 0.97 | 0.94  | 0.89  | — 0.99  |
| Sex at birth, female                                             | 0.73                          | 0.71  | — 0.75 | 0.75          | 0.71  | — 0.79 | 0.73  | 0.67  | — 0.80 | 0.74                        | 0.65  | — 0.84 | 0.63          | 0.58  | — 0.69 | 0.56  | 0.50  | — 0.64  |
| Age category, years                                              |                               |       |        |               |       |        |       |       |        |                             |       |        |               |       |        |       |       |         |
| 19-39                                                            | 1.16                          | 1.12  | — 1.19 | 0.61          | 0.57  | — 0.65 | 0.61  | 0.54  | — 0.69 | 0.60                        | 0.51  | — 0.71 | 0.26          | 0.22  | — 0.30 | 0.15  | 0.11  | — 0.21  |
| 40-49                                                            | 0.97                          | 0.94  | — 1.01 | 0.75          | 0.70  | — 0.80 | 0.81  | 0.73  | — 0.91 | 0.68                        | 0.59  | — 0.79 | 0.46          | 0.40  | — 0.54 | 0.38  | 0.30  | — 0.48  |
| 50-59                                                            | ref                           | ref   | ref    | ref           | ref   | ref    | ref   | ref   | ref    | ref                         | ref   | ref    | ref           | ref   | ref    | ref   | ref   | ref     |
| 60-69                                                            | 1.01                          | 0.99  | — 1.03 | 1.29          | 1.23  | — 1.34 | 1.16  | 1.08  | — 1.25 | 1.32                        | 1.21  | — 1.46 | 1.95          | 1.81  | — 2.10 | 2.86  | 2.55  | — 3.20  |
| 70-79                                                            | 0.81                          | 0.79  | — 0.83 | 1.43          | 1.37  | — 1.49 | 1.00  | 0.92  | — 1.08 | 1.49                        | 1.36  | — 1.64 | 2.60          | 2.41  | — 2.79 | 5.93  | 5.32  | — 6.61  |
| ≥80                                                              | 0.96                          | 0.93  | — 0.99 | 1.81          | 1.71  | — 1.91 | 0.95  | 0.87  | — 1.04 | 1.62                        | 1.45  | — 1.82 | 5.06          | 4.68  | — 5.46 | 13.86 | 12.37 | — 15.53 |
| White (vs not white)                                             | 1.21                          | 1.14  | — 1.28 | 0.88          | 0.81  | — 0.97 | 1.23  | 1.02  | — 1.49 | 0.74                        | 0.61  | — 0.91 | 1.10          | 0.95  | — 1.27 | 0.87  | 0.74  | — 1.04  |
| Black vs( not Black)                                             | 1.49                          | 1.40  | — 1.58 | 1.36          | 1.24  | — 1.50 | 1.53  | 1.26  | — 1.85 | 1.10                        | 0.89  | — 1.35 | 1.05          | 0.90  | — 1.22 | 0.78  | 0.66  | — 0.94  |
| Hispanic (vs not Hispanic)                                       | 1.07                          | 1.04  | — 1.10 | 1.16          | 1.10  | — 1.22 | 1.23  | 1.13  | — 1.35 | 1.03                        | 0.92  | — 1.15 | 1.07          | 0.99  | — 1.14 | 1.13  | 1.04  | — 1.24  |
| Body-mass index category, kg/m <sup>2</sup>                      |                               |       |        |               |       |        |       |       |        |                             |       |        |               |       |        |       |       |         |
| <18.5                                                            | 1.35                          | 1.29  | — 1.42 | 1.14          | 1.01  | — 1.29 | 1.51  | 1.31  | — 1.73 | 1.35                        | 1.06  | — 1.72 | 2.48          | 2.33  | — 2.65 | 1.81  | 1.59  | — 2.07  |
| 18.5-24.9                                                        | ref                           | ref   | ref    | ref           | ref   | ref    | ref   | ref   | ref    | ref                         | ref   | ref    | ref           | ref   | ref    | ref   | ref   | ref     |
| 25-29.9                                                          | 0.75                          | 0.73  | — 0.76 | 0.81          | 0.78  | — 0.85 | 0.70  | 0.65  | — 0.74 | 0.89                        | 0.82  | — 0.97 | 0.54          | 0.52  | — 0.56 | 0.73  | 0.68  | — 0.79  |
| 30-34.9                                                          | 0.67                          | 0.65  | — 0.68 | 0.76          | 0.73  | — 0.80 | 0.62  | 0.57  | — 0.66 | 0.88                        | 0.81  | — 0.96 | 0.42          | 0.40  | — 0.44 | 0.69  | 0.64  | — 0.74  |
| 35-39.9                                                          | 0.63                          | 0.61  | — 0.65 | 0.76          | 0.72  | — 0.80 | 0.57  | 0.52  | — 0.62 | 0.85                        | 0.76  | — 0.94 | 0.37          | 0.35  | — 0.40 | 0.64  | 0.59  | — 0.70  |
| ≥40                                                              | 0.65                          | 0.63  | — 0.67 | 0.87          | 0.82  | — 0.93 | 0.59  | 0.53  | — 0.65 | 1.03                        | 0.91  | — 1.16 | 0.43          | 0.39  | — 0.46 | 0.80  | 0.72  | — 0.88  |
| Tobacco use                                                      |                               |       |        |               |       |        |       |       |        |                             |       |        |               |       |        |       |       |         |
| Never                                                            | ref                           | ref   | ref    | ref           | ref   | ref    | ref   | ref   | ref    | ref                         | ref   | ref    | ref           | ref   | ref    | ref   | ref   | ref     |
| Former                                                           | 1.25                          | 1.23  | — 1.28 | 1.11          | 1.08  | — 1.15 | 1.12  | 1.06  | — 1.19 | 1.10                        | 1.02  | — 1.17 | 1.09          | 1.04  | — 1.13 | 1.18  | 1.12  | — 1.24  |
| Current                                                          | 2.02                          | 1.98  | — 2.06 | 1.39          | 1.35  | — 1.44 | 1.76  | 1.66  | — 1.87 | 1.29                        | 1.20  | — 1.39 | 1.67          | 1.60  | — 1.74 | 1.24  | 1.17  | — 1.32  |
| Urban/rural/highly rural residence                               |                               |       |        |               |       |        |       |       |        |                             |       |        |               |       |        |       |       |         |
| Highly rural                                                     | 0.68                          | 0.64  | — 0.73 | 0.58          | 0.50  | — 0.66 | 0.98  | 0.82  | — 1.18 | 0.74                        | 0.54  | — 1.00 | 0.92          | 0.81  | — 1.05 | 1.16  | 0.98  | — 1.38  |
| Rural                                                            | 0.74                          | 0.73  | — 0.75 | 0.70          | 0.68  | — 0.72 | 0.74  | 0.70  | — 0.78 | 0.88                        | 0.82  | — 0.93 | 0.89          | 0.87  | — 0.92 | 1.03  | 0.99  | — 1.08  |
| Urban                                                            | ref                           | ref   | ref    | ref           | ref   | ref    | ref   | ref   | ref    | ref                         | ref   | ref    | ref           | ref   | ref    | ref   | ref   | ref     |
| Unknown                                                          | 0.25                          | 0.18  | — 0.35 | 0.27          | 0.10  | — 0.75 | 0.35  | 0.13  | — 0.94 | 0.55                        | 0.08  | — 3.99 | 0.80          | 0.51  | — 1.25 | 1.77  | 0.73  | — 4.30  |
| Diabetes                                                         | 1.18                          | 1.16  | — 1.20 | 1.30          | 1.27  | — 1.34 | 1.26  | 1.21  | — 1.32 | 1.26                        | 1.19  | — 1.34 | 1.41          | 1.36  | — 1.45 | 1.37  | 1.31  | — 1.43  |
| Hypertension                                                     | 1.22                          | 1.19  | — 1.24 | 1.30          | 1.25  | — 1.35 | 1.30  | 1.22  | — 1.39 | 1.29                        | 1.19  | — 1.41 | 1.09          | 1.04  | — 1.14 | 0.96  | 0.90  | — 1.02  |
| Cardiovascular disease                                           | 2.04                          | 2.01  | — 2.08 | 1.84          | 1.79  | — 1.90 | 2.69  | 2.55  | — 2.84 | 2.08                        | 1.95  | — 2.23 | 1.88          | 1.81  | — 1.95 | 1.24  | 1.18  | — 1.30  |
| Heart failure                                                    | 2.13                          | 2.09  | — 2.16 | 1.64          | 1.59  | — 1.70 | 2.34  | 2.22  | — 2.46 | 1.53                        | 1.43  | — 1.63 | 2.51          | 2.42  | — 2.59 | 1.31  | 1.25  | — 1.38  |
| Alcohol use disorder                                             | 1.12                          | 1.10  | — 1.14 | 0.75          | 0.72  | — 0.78 | 1.03  | 0.97  | — 1.09 | 0.86                        | 0.79  | — 0.93 | 0.78          | 0.75  | — 0.82 | 0.68  | 0.64  | — 0.73  |
| Estimated glomerular filtration rate, ml/min/1.73 m <sup>2</sup> |                               |       |        |               |       |        |       |       |        |                             |       |        |               |       |        |       |       |         |
| ≥ 90                                                             | ref                           | ref   | ref    | ref           | ref   | ref    | ref   | ref   | ref    | ref                         | ref   | ref    | ref           | ref   | ref    | ref   | ref   | ref     |
| 60-89                                                            | 0.80                          | 0.79  | — 0.82 | 0.90          | 0.87  | — 0.93 | 0.80  | 0.76  | — 0.85 | 0.96                        | 0.88  | — 1.04 | 0.60          | 0.57  | — 0.62 | 1.10  | 1.02  | — 1.18  |
| 45-59                                                            | 0.84                          | 0.81  | — 0.86 | 0.99          | 0.94  | — 1.03 | 0.84  | 0.78  | — 0.91 | 1.00                        | 0.91  | — 1.10 | 0.71          | 0.67  | — 0.74 | 1.44  | 1.33  | — 1.56  |
| 30-44                                                            | 0.93                          | 0.90  | — 0.96 | 1.10          | 1.04  | — 1.16 | 0.92  | 0.84  | — 1.01 | 1.14                        | 1.02  | — 1.29 | 0.99          | 0.93  | — 1.05 | 1.83  | 1.68  | — 1.99  |
| 15-29                                                            | 1.15                          | 1.10  | — 1.20 | 1.31          | 1.21  | — 1.42 | 1.14  | 1.01  | — 1.29 | 1.32                        | 1.14  | — 1.53 | 2.07          | 1.94  | — 2.21 | 2.65  | 2.36  | — 2.97  |
| <15 or dialysis                                                  | 1.60                          | 1.52  | — 1.69 | 1.46          | 1.33  | — 1.60 | 1.77  | 1.56  | — 2.00 | 1.51                        | 1.29  | — 1.77 | 3.07          | 2.85  | — 3.32 | 2.48  | 2.16  | — 2.85  |

Models additionally adjusted for index month and geographic location by Veterans Integrated Service Network location

For peer review only - <http://bmjopen.bmj.com/site/about/guidelines.xhtml>

**Table 2b.** Odds ratios from logistic regression models testing the association of active statin prescription at enrollment with adverse 30-day outcomes among VHA Veterans with and without a positive respiratory swab for SARS-CoV-2, without adjustment for prior statin use

|                                                                  | No positive swab, n=4,568,689 |       |        |               |       |        |       |       |        | ≥1 positive swab, n=231,017 |       |        |               |       |        |       |       |         |
|------------------------------------------------------------------|-------------------------------|-------|--------|---------------|-------|--------|-------|-------|--------|-----------------------------|-------|--------|---------------|-------|--------|-------|-------|---------|
|                                                                  | Hospital admission            |       |        | ICU admission |       |        | Death |       |        | Hospital admission          |       |        | ICU admission |       |        | Death |       |         |
|                                                                  | OR                            | 95%CI |        | OR            | 95%CI |        | OR    | 95%CI |        | OR                          | 95%CI |        | OR            | 95%CI |        | OR    | 95%CI |         |
| Active statin prescription at enrollment                         | 0.75                          | 0.74  | — 0.76 | 0.80          | 0.76  | — 0.83 | 0.58  | 0.56  | — 0.59 | 0.94                        | 0.91  | — 0.96 | 0.93          | 0.88  | — 0.98 | 0.78  | 0.75  | — 0.82  |
| Sex at birth, female                                             | 0.73                          | 0.71  | — 0.75 | 0.73          | 0.67  | — 0.81 | 0.63  | 0.58  | — 0.69 | 0.75                        | 0.71  | — 0.79 | 0.74          | 0.65  | — 0.84 | 0.57  | 0.50  | — 0.65  |
| Age category, years                                              |                               |       |        |               |       |        |       |       |        |                             |       |        |               |       |        |       |       |         |
| 19-39                                                            | 1.16                          | 1.13  | — 1.20 | 0.61          | 0.54  | — 0.69 | 0.26  | 0.22  | — 0.30 | 0.61                        | 0.58  | — 0.66 | 0.60          | 0.51  | — 0.71 | 0.15  | 0.11  | — 0.21  |
| 40-49                                                            | 0.98                          | 0.95  | — 1.01 | 0.82          | 0.73  | — 0.92 | 0.47  | 0.40  | — 0.54 | 0.75                        | 0.71  | — 0.80 | 0.68          | 0.59  | — 0.79 | 0.38  | 0.30  | — 0.48  |
| 50-59                                                            | ref                           | ref   | ref    | ref           | ref   | ref    | ref   | ref   | ref    | ref                         | ref   | ref    | ref           | ref   | ref    | ref   | ref   | ref     |
| 60-69                                                            | 1.01                          | 0.98  | — 1.03 | 1.16          | 1.08  | — 1.25 | 1.95  | 1.81  | — 2.10 | 1.28                        | 1.23  | — 1.34 | 1.32          | 1.21  | — 1.45 | 2.86  | 2.55  | — 3.20  |
| 70-79                                                            | 0.81                          | 0.79  | — 0.83 | 0.99          | 0.92  | — 1.07 | 2.59  | 2.41  | — 2.78 | 1.43                        | 1.36  | — 1.49 | 1.49          | 1.36  | — 1.64 | 5.92  | 5.31  | — 6.60  |
| ≥80                                                              | 0.96                          | 0.93  | — 0.99 | 0.95          | 0.87  | — 1.04 | 5.06  | 4.68  | — 5.46 | 1.81                        | 1.71  | — 1.91 | 1.62          | 1.45  | — 1.82 | 13.86 | 12.37 | — 15.53 |
| White (vs not white)                                             | 1.20                          | 1.14  | — 1.28 | 1.23          | 1.02  | — 1.49 | 1.10  | 0.95  | — 1.27 | 0.88                        | 0.81  | — 0.97 | 0.75          | 0.61  | — 0.91 | 0.87  | 0.74  | — 1.04  |
| Black vs (not Black)                                             | 1.49                          | 1.40  | — 1.58 | 1.53          | 1.26  | — 1.86 | 1.05  | 0.90  | — 1.22 | 1.37                        | 1.24  | — 1.50 | 1.10          | 0.89  | — 1.35 | 0.78  | 0.66  | — 0.94  |
| Hispanic (vs not Hispanic)                                       | 1.07                          | 1.04  | — 1.10 | 1.23          | 1.13  | — 1.35 | 1.06  | 0.99  | — 1.14 | 1.16                        | 1.10  | — 1.22 | 1.03          | 0.92  | — 1.15 | 1.13  | 1.04  | — 1.24  |
| Body-mass index category, kg/m <sup>2</sup>                      |                               |       |        |               |       |        |       |       |        |                             |       |        |               |       |        |       |       |         |
| <18.5                                                            | 1.35                          | 1.29  | — 1.42 | 1.51          | 1.32  | — 1.74 | 2.49  | 2.33  | — 2.65 | 1.14                        | 1.02  | — 1.29 | 1.35          | 1.06  | — 1.72 | 1.82  | 1.59  | — 2.07  |
| 18.5-24.9                                                        | ref                           | ref   | ref    | ref           | ref   | ref    | ref   | ref   | ref    | ref                         | ref   | ref    | ref           | ref   | ref    | ref   | ref   | ref     |
| 25-29.9                                                          | 0.75                          | 0.73  | — 0.76 | 0.70          | 0.65  | — 0.74 | 0.54  | 0.52  | — 0.56 | 0.81                        | 0.78  | — 0.85 | 0.89          | 0.82  | — 0.97 | 0.73  | 0.68  | — 0.79  |
| 30-34.9                                                          | 0.67                          | 0.65  | — 0.68 | 0.61          | 0.57  | — 0.66 | 0.42  | 0.40  | — 0.44 | 0.76                        | 0.73  | — 0.80 | 0.88          | 0.81  | — 0.96 | 0.68  | 0.64  | — 0.74  |
| 35-39.9                                                          | 0.63                          | 0.61  | — 0.64 | 0.57          | 0.52  | — 0.62 | 0.37  | 0.35  | — 0.40 | 0.76                        | 0.72  | — 0.80 | 0.85          | 0.76  | — 0.94 | 0.64  | 0.59  | — 0.70  |
| ≥40                                                              | 0.65                          | 0.63  | — 0.67 | 0.58          | 0.53  | — 0.65 | 0.43  | 0.39  | — 0.46 | 0.87                        | 0.81  | — 0.92 | 1.03          | 0.91  | — 1.16 | 0.79  | 0.72  | — 0.88  |
| Tobacco use                                                      |                               |       |        |               |       |        |       |       |        |                             |       |        |               |       |        |       |       |         |
| Never                                                            | ref                           | ref   | ref    | ref           | ref   | ref    | ref   | ref   | ref    | ref                         | ref   | ref    | ref           | ref   | ref    | ref   | ref   | ref     |
| Former                                                           | 1.25                          | 1.22  | — 1.27 | 1.12          | 1.05  | — 1.19 | 1.09  | 1.04  | — 1.13 | 1.11                        | 1.08  | — 1.15 | 1.10          | 1.02  | — 1.17 | 1.18  | 1.12  | — 1.24  |
| Current                                                          | 2.02                          | 1.98  | — 2.05 | 1.76          | 1.66  | — 1.87 | 1.66  | 1.60  | — 1.74 | 1.39                        | 1.35  | — 1.44 | 1.29          | 1.20  | — 1.39 | 1.24  | 1.17  | — 1.32  |
| Urban/rural/highly rural residence                               |                               |       |        |               |       |        |       |       |        |                             |       |        |               |       |        |       |       |         |
| Highly rural                                                     | 0.68                          | 0.64  | — 0.73 | 0.98          | 0.82  | — 1.18 | 0.92  | 0.81  | — 1.05 | 0.57                        | 0.50  | — 0.66 | 0.74          | 0.54  | — 1.00 | 1.16  | 0.98  | — 1.38  |
| Rural                                                            | 0.74                          | 0.73  | — 0.75 | 0.74          | 0.70  | — 0.78 | 0.89  | 0.86  | — 0.92 | 0.70                        | 0.68  | — 0.72 | 0.87          | 0.82  | — 0.93 | 1.03  | 0.99  | — 1.08  |
| Urban                                                            | ref                           | ref   | ref    | ref           | ref   | ref    | ref   | ref   | ref    | ref                         | ref   | ref    | ref           | ref   | ref    | ref   | ref   | ref     |
| Unknown                                                          | 0.25                          | 0.18  | — 0.35 | 0.35          | 0.13  | — 0.94 | 0.80  | 0.51  | — 1.25 | 0.27                        | 0.10  | — 0.74 | 0.55          | 0.08  | — 3.98 | 1.75  | 0.72  | — 4.27  |
| Diabetes                                                         | 1.17                          | 1.15  | — 1.19 | 1.25          | 1.20  | — 1.31 | 1.40  | 1.36  | — 1.45 | 1.30                        | 1.26  | — 1.33 | 1.26          | 1.19  | — 1.33 | 1.36  | 1.30  | — 1.42  |
| Hypertension                                                     | 1.21                          | 1.19  | — 1.24 | 1.29          | 1.21  | — 1.38 | 1.09  | 1.04  | — 1.13 | 1.30                        | 1.25  | — 1.35 | 1.29          | 1.18  | — 1.41 | 0.96  | 0.90  | — 1.02  |
| Cardiovascular disease                                           | 2.03                          | 2.00  | — 2.07 | 2.67          | 2.53  | — 2.82 | 1.87  | 1.80  | — 1.94 | 1.84                        | 1.78  | — 1.89 | 2.08          | 1.94  | — 2.23 | 1.24  | 1.18  | — 1.30  |
| Heart failure                                                    | 2.12                          | 2.08  | — 2.16 | 2.33          | 2.21  | — 2.45 | 2.50  | 2.41  | — 2.59 | 1.64                        | 1.59  | — 1.70 | 1.53          | 1.43  | — 1.63 | 1.31  | 1.25  | — 1.38  |
| Alcohol use disorder                                             | 1.12                          | 1.10  | — 1.14 | 1.03          | 0.97  | — 1.09 | 0.78  | 0.75  | — 0.82 | 0.75                        | 0.73  | — 0.78 | 0.86          | 0.79  | — 0.93 | 0.68  | 0.64  | — 0.73  |
| Estimated glomerular filtration rate, ml/min/1.73 m <sup>2</sup> |                               |       |        |               |       |        |       |       |        |                             |       |        |               |       |        |       |       |         |
| ≥ 90                                                             | ref                           | ref   | ref    | ref           | ref   | ref    | ref   | ref   | ref    | ref                         | ref   | ref    | ref           | ref   | ref    | ref   | ref   | ref     |
| 60-89                                                            | 0.80                          | 0.79  | — 0.82 | 0.80          | 0.75  | — 0.85 | 0.60  | 0.57  | — 0.62 | 0.90                        | 0.86  | — 0.93 | 0.96          | 0.88  | — 1.04 | 1.09  | 1.02  | — 1.18  |
| 45-59                                                            | 0.84                          | 0.81  | — 0.86 | 0.84          | 0.78  | — 0.91 | 0.71  | 0.67  | — 0.74 | 0.98                        | 0.94  | — 1.03 | 1.00          | 0.91  | — 1.09 | 1.44  | 1.33  | — 1.56  |
| 30-44                                                            | 0.93                          | 0.90  | — 0.96 | 0.92          | 0.84  | — 1.01 | 0.99  | 0.93  | — 1.05 | 1.10                        | 1.04  | — 1.16 | 1.14          | 1.02  | — 1.29 | 1.83  | 1.68  | — 1.99  |
| 15-29                                                            | 1.14                          | 1.09  | — 1.20 | 1.14          | 1.01  | — 1.29 | 2.07  | 1.94  | — 2.21 | 1.31                        | 1.21  | — 1.42 | 1.32          | 1.14  | — 1.53 | 2.65  | 2.36  | — 2.97  |
| <15 or dialysis                                                  | 1.60                          | 1.52  | — 1.69 | 1.77          | 1.56  | — 2.01 | 3.08  | 2.85  | — 3.32 | 1.46                        | 1.33  | — 1.60 | 1.51          | 1.29  | — 1.77 | 2.48  | 2.16  | — 2.85  |

Models additionally adjusted for index month and geographic location by Veterans Integrated Service Network location

**Table 3.** Odds ratios from logistic regression models testing the association of specific statins compared to no statin with adverse 30-day outcomes among VHA Veterans with a positive respiratory swab for SARS-CoV-2, n=231,017

|                                             | Hospital admission |        |   |      |         | ICU admission |        |   |       |         | Death |        |   |       |         |
|---------------------------------------------|--------------------|--------|---|------|---------|---------------|--------|---|-------|---------|-------|--------|---|-------|---------|
|                                             | OR                 | 95% CI |   |      | p value | OR            | 95% CI |   |       | p value | OR    | 95% CI |   |       | p value |
| No statin                                   | ref                |        |   |      |         | ref           |        |   |       |         | ref   |        |   |       |         |
| Atorvastatin                                | 0.98               | 0.95   | — | 1.01 | 0.136   | 0.96          | 0.90   | — | 1.02  | 0.194   | 0.80  | 0.76   | — | 0.84  | <0.001  |
| Fluvastatin                                 | 1.47               | 0.45   | — | 4.82 | 0.524   | 1.79          | 0.23   | — | 13.80 | 0.577   | 0.55  | 0.07   | — | 4.43  | 0.575   |
| Lovastatin                                  | 0.73               | 0.57   | — | 0.93 | 0.012   | 0.48          | 0.26   | — | 0.90  | 0.022   | 0.64  | 0.45   | — | 0.91  | 0.013   |
| Pitavastatin                                | 0.45               | 0.16   | — | 1.26 | 0.128   | 0.66          | 0.09   | — | 4.80  | 0.679   | 0.82  | 0.25   | — | 2.68  | 0.738   |
| Pravastatin                                 | 0.93               | 0.86   | — | 1.00 | 0.045   | 0.94          | 0.81   | — | 1.10  | 0.443   | 0.78  | 0.70   | — | 0.87  | <0.001  |
| Rosuvastatin                                | 0.81               | 0.76   | — | 0.86 | <0.001  | 0.82          | 0.72   | — | 0.93  | 0.002   | 0.72  | 0.65   | — | 0.79  | <0.001  |
| Simvastatin                                 | 0.91               | 0.86   | — | 0.97 | 0.001   | 0.91          | 0.80   | — | 1.02  | 0.107   | 0.77  | 0.71   | — | 0.84  | <0.001  |
| Sex at birth, female                        | 0.75               | 0.71   | — | 0.80 | <0.001  | 0.74          | 0.65   | — | 0.84  | <0.001  | 0.57  | 0.50   | — | 0.65  | <0.001  |
| Age category, years                         |                    |        |   |      |         |               |        |   |       |         |       |        |   |       |         |
| 19-39                                       | 0.61               | 0.58   | — | 0.66 | <0.001  | 0.60          | 0.51   | — | 0.71  | <0.001  | 0.15  | 0.11   | — | 0.21  | <0.001  |
| 40-49                                       | 0.75               | 0.71   | — | 0.80 | <0.001  | 0.68          | 0.59   | — | 0.79  | <0.001  | 0.38  | 0.30   | — | 0.48  | <0.001  |
| 50-59                                       | ref                |        |   |      |         | ref           |        |   |       |         | ref   |        |   |       |         |
| 60-69                                       | 1.28               | 1.23   | — | 1.34 | <0.001  | 1.32          | 1.21   | — | 1.45  | <0.001  | 2.85  | 2.55   | — | 3.20  | <0.001  |
| 70-79                                       | 1.43               | 1.36   | — | 1.49 | <0.001  | 1.49          | 1.36   | — | 1.64  | <0.001  | 5.92  | 5.31   | — | 6.60  | <0.001  |
| ≥80                                         | 1.81               | 1.71   | — | 1.91 | <0.001  | 1.62          | 1.45   | — | 1.82  | <0.001  | 13.86 | 12.37  | — | 15.54 | <0.001  |
| White (vs. not white)                       | 0.88               | 0.81   | — | 0.97 | 0.007   | 0.75          | 0.61   | — | 0.91  | 0.004   | 0.88  | 0.74   | — | 1.04  | 0.121   |
| Black (vs. not Black)                       | 1.36               | 1.24   | — | 1.50 | <0.001  | 1.10          | 0.89   | — | 1.35  | 0.390   | 0.78  | 0.66   | — | 0.94  | 0.007   |
| Hispanic (vs. not Hispanic)                 | 1.16               | 1.10   | — | 1.22 | <0.001  | 1.03          | 0.92   | — | 1.15  | 0.633   | 1.13  | 1.04   | — | 1.24  | 0.007   |
| Body-mass index category, kg/m <sup>2</sup> |                    |        |   |      |         |               |        |   |       |         |       |        |   |       |         |
| <18.5                                       | 1.15               | 1.02   | — | 1.29 | 0.025   | 1.35          | 1.06   | — | 1.73  | 0.015   | 1.82  | 1.59   | — | 2.08  | <0.001  |
| 18.5-24.9                                   | ref                |        |   |      |         | ref           |        |   |       |         | ref   |        |   |       |         |
| 25-29.9                                     | 0.81               | 0.78   | — | 0.85 | <0.001  | 0.89          | 0.82   | — | 0.97  | 0.006   | 0.73  | 0.68   | — | 0.79  | <0.001  |
| 30-34.9                                     | 0.76               | 0.73   | — | 0.80 | <0.001  | 0.88          | 0.81   | — | 0.97  | 0.006   | 0.68  | 0.64   | — | 0.74  | <0.001  |
| 35-39.9                                     | 0.76               | 0.72   | — | 0.80 | <0.001  | 0.85          | 0.76   | — | 0.94  | 0.002   | 0.64  | 0.59   | — | 0.70  | <0.001  |
| ≥40                                         | 0.87               | 0.81   | — | 0.92 | <0.001  | 1.03          | 0.91   | — | 1.16  | 0.675   | 0.79  | 0.72   | — | 0.88  | <0.001  |
| Tobacco use                                 |                    |        |   |      |         |               |        |   |       |         |       |        |   |       |         |
| Never                                       | ref                |        |   |      |         |               |        |   |       |         |       |        |   |       |         |
| Former                                      | 1.11               | 1.08   | — | 1.15 | <0.001  | 1.10          | 1.02   | — | 1.17  | 0.010   | 1.18  | 1.12   | — | 1.24  | <0.001  |
| Current                                     | 1.39               | 1.35   | — | 1.44 | <0.001  | 1.29          | 1.20   | — | 1.39  | <0.001  | 1.24  | 1.17   | — | 1.32  | <0.001  |
| Urban/rural/highly rural residence          |                    |        |   |      |         |               |        |   |       |         |       |        |   |       |         |
| Highly rural                                | 0.57               | 0.50   | — | 0.66 | <0.001  | 0.74          | 0.54   | — | 1.00  | 0.051   | 1.16  | 0.97   | — | 1.38  | 0.096   |
| Rural                                       | 0.70               | 0.68   | — | 0.72 | <0.001  | 0.88          | 0.82   | — | 0.93  | <0.001  | 1.04  | 0.99   | — | 1.08  | 0.140   |
| Urban                                       | ref                |        |   |      |         | ref           |        |   |       |         | ref   |        |   |       |         |
| Unknown                                     | 0.27               | 0.10   | — | 0.74 | 0.011   | 0.55          | 0.08   | — | 3.96  | 0.549   | 1.75  | 0.72   | — | 4.25  | 0.220   |
| Diabetes                                    | 1.29               | 1.26   | — | 1.33 | <0.001  | 1.26          | 1.19   | — | 1.33  | <0.001  | 1.36  | 1.30   | — | 1.42  | <0.001  |
| Hypertension                                | 1.30               | 1.25   | — | 1.35 | <0.001  | 1.29          | 1.18   | — | 1.41  | <0.001  | 0.96  | 0.90   | — | 1.02  | 0.149   |
| Cardiovascular disease                      | 1.84               | 1.78   | — | 1.89 | <0.001  | 2.08          | 1.94   | — | 2.23  | <0.001  | 1.24  | 1.18   | — | 1.30  | <0.001  |
| Heart failure                               | 1.64               | 1.58   | — | 1.69 | <0.001  | 1.53          | 1.43   | — | 1.63  | <0.001  | 1.31  | 1.25   | — | 1.38  | <0.001  |
| Alcohol use disorder                        | 0.75               | 0.73   | — | 0.78 | <0.001  | 0.86          | 0.79   | — | 0.93  | <0.001  | 0.69  | 0.64   | — | 0.73  | <0.001  |

1 **Table 3 CONTINUED.** Odds ratios from logistic regression models testing the association of individual statins compared to no statin with adverse 30-day outcomes  
2 among VHA Veterans with a positive respiratory swab for SARS-CoV-2, n=231,017

| 3 Estimated glomerular filtration rate,<br>4 ml/min/1.73 m <sup>2</sup> | ref  |      |   |      |        | ref  |      |   |      |        | ref  |      |   |      |        |
|-------------------------------------------------------------------------|------|------|---|------|--------|------|------|---|------|--------|------|------|---|------|--------|
| 5 ≥ 90                                                                  | 0.90 | 0.87 | — | 0.93 | <0.001 | 0.96 | 0.88 | — | 1.04 | 0.273  | 1.10 | 1.02 | — | 1.18 | 0.018  |
| 6 60-89                                                                 | 0.99 | 0.94 | — | 1.03 | 0.519  | 1.00 | 0.91 | — | 1.10 | 0.941  | 1.44 | 1.33 | — | 1.56 | <0.001 |
| 7 45-59                                                                 | 1.10 | 1.04 | — | 1.16 | 0.001  | 1.15 | 1.02 | — | 1.29 | 0.024  | 1.83 | 1.68 | — | 1.99 | <0.001 |
| 8 30-44                                                                 | 1.31 | 1.21 | — | 1.42 | <0.001 | 1.32 | 1.14 | — | 1.53 | <0.001 | 2.65 | 2.36 | — | 2.97 | <0.001 |
| 9 15-29                                                                 | 1.45 | 1.32 | — | 1.59 | <0.001 | 1.51 | 1.29 | — | 1.77 | <0.001 | 2.48 | 2.16 | — | 2.84 | <0.001 |
| 9 <15 or dialysis                                                       |      |      |   |      |        |      |      |   |      |        |      |      |   |      |        |

10 Models additionally adjusted for month of diagnosis and geographic location by Veterans Integrated Service Network location; not adjusted for the presence of an active statin  
11 prescription six months prior to enrollment

For peer review only

12  
13  
14  
15  
16  
17  
18  
19  
20  
21  
22  
23  
24  
25  
26  
27  
28  
29  
30  
31  
32  
33  
34  
35  
36  
37  
38  
39  
40  
41  
42  
43  
44  
45  
46  
47

**Table 4.** Odds ratios from logistic regression models testing the association of low- or moderate- vs. high-potency active statin prescription at enrollment with adverse 30-day outcomes among VHA Veterans with a positive respiratory swab for SARS-CoV-2, n=69,263

|                                                                  | Hospital admission |             |  |         |  | ICU admission |              |  |         |  | Death |              |  |         |  |
|------------------------------------------------------------------|--------------------|-------------|--|---------|--|---------------|--------------|--|---------|--|-------|--------------|--|---------|--|
|                                                                  | OR                 | 95% CI      |  | p value |  | OR            | 95% CI       |  | p value |  | OR    | 95% CI       |  | p value |  |
| High-potency statin                                              | 1.06               | 1.01 — 1.10 |  | 0.011   |  | 1.05          | 0.96 — 1.15  |  | 0.258   |  | 0.97  | 0.91 — 1.04  |  | 0.407   |  |
| Sex at birth, female                                             | 0.89               | 0.80 — 1.00 |  | 0.041   |  | 0.95          | 0.75 — 1.19  |  | 0.634   |  | 0.52  | 0.40 — 0.68  |  | <0.001  |  |
| Age category, years                                              |                    |             |  |         |  |               |              |  |         |  |       |              |  |         |  |
| 19-39                                                            | 0.82               | 0.63 — 1.06 |  | 0.123   |  | 0.46          | 0.22 — 0.98  |  | 0.045   |  | 0.10  | 0.01 — 0.73  |  | 0.023   |  |
| 40-49                                                            | 0.74               | 0.64 — 0.86 |  | <0.001  |  | 0.55          | 0.38 — 0.79  |  | 0.001   |  | 0.45  | 0.27 — 0.75  |  | 0.002   |  |
| 50-59                                                            | ref                |             |  |         |  | ref           |              |  |         |  | ref   |              |  |         |  |
| 60-69                                                            | 1.30               | 1.20 — 1.40 |  | <0.001  |  | 1.24          | 1.06 — 1.45  |  | 0.009   |  | 2.45  | 2.02 — 2.96  |  | <0.001  |  |
| 70-79                                                            | 1.47               | 1.36 — 1.58 |  | <0.001  |  | 1.47          | 1.25 — 1.72  |  | <0.001  |  | 4.42  | 3.67 — 5.32  |  | <0.001  |  |
| ≥80                                                              | 1.95               | 1.78 — 2.15 |  | <0.001  |  | 1.69          | 1.40 — 2.04  |  | <0.001  |  | 9.54  | 7.84 — 11.60 |  | <0.001  |  |
| White (vs not white)                                             | 0.81               | 0.69 — 0.96 |  | 0.012   |  | 0.75          | 0.52 — 1.08  |  | 0.118   |  | 0.85  | 0.64 — 1.11  |  | 0.221   |  |
| Black vs( not Black)                                             | 1.31               | 1.10 — 1.55 |  | 0.002   |  | 1.12          | 0.77 — 1.63  |  | 0.545   |  | 0.80  | 0.60 — 1.06  |  | 0.125   |  |
| Hispanic (vs not Hispanic)                                       | 1.12               | 1.02 — 1.22 |  | 0.013   |  | 0.91          | 0.75 — 1.10  |  | 0.330   |  | 1.20  | 1.04 — 1.38  |  | 0.014   |  |
| Body-mass index category, kg/m <sup>2</sup>                      |                    |             |  |         |  |               |              |  |         |  |       |              |  |         |  |
| <18.5                                                            | 1.04               | 0.79 — 1.38 |  | 0.766   |  | 1.19          | 0.71 — 1.98  |  | 0.511   |  | 1.45  | 1.02 — 2.05  |  | 0.039   |  |
| 18.5-24.9                                                        | ref                |             |  |         |  | ref           |              |  |         |  | ref   |              |  |         |  |
| 25-29.9                                                          | 0.81               | 0.75 — 0.86 |  | <0.001  |  | 0.89          | 0.77 — 1.02  |  | 0.095   |  | 0.78  | 0.70 — 0.87  |  | <0.001  |  |
| 30-34.9                                                          | 0.78               | 0.73 — 0.84 |  | <0.001  |  | 0.92          | 0.80 — 1.07  |  | 0.272   |  | 0.78  | 0.70 — 0.87  |  | <0.001  |  |
| 35-39.9                                                          | 0.78               | 0.71 — 0.85 |  | <0.001  |  | 0.90          | 0.76 — 1.06  |  | 0.188   |  | 0.75  | 0.67 — 0.85  |  | <0.001  |  |
| ≥40                                                              | 0.86               | 0.77 — 0.95 |  | 0.002   |  | 1.08          | 0.89 — 1.30  |  | 0.452   |  | 0.91  | 0.78 — 1.06  |  | 0.221   |  |
| Tobacco use                                                      |                    |             |  |         |  |               |              |  |         |  |       |              |  |         |  |
| Never                                                            | ref                |             |  |         |  | ref           |              |  |         |  | ref   |              |  |         |  |
| Former                                                           | 1.18               | 1.12 — 1.25 |  | <0.001  |  | 1.16          | 1.03 — 1.30  |  | 0.013   |  | 1.29  | 1.18 — 1.40  |  | <0.001  |  |
| Current                                                          | 1.36               | 1.28 — 1.44 |  | <0.001  |  | 1.36          | 1.19 — 1.55  |  | <0.001  |  | 1.21  | 1.09 — 1.34  |  | <0.001  |  |
| Urban/rural/highly rural residence                               |                    |             |  |         |  |               |              |  |         |  |       |              |  |         |  |
| Highly rural                                                     | 0.59               | 0.47 — 0.73 |  | <0.001  |  | 0.93          | 0.61 — 1.42  |  | 0.728   |  | 1.40  | 1.08 — 1.82  |  | 0.011   |  |
| Rural                                                            | 0.68               | 0.65 — 0.72 |  | <0.001  |  | 0.87          | 0.79 — 0.96  |  | 0.006   |  | 1.05  | 0.97 — 1.12  |  | 0.233   |  |
| Urban                                                            | ref                |             |  |         |  | ref           |              |  |         |  | ref   |              |  |         |  |
| Unknown                                                          | 0.17               | 0.02 — 1.26 |  | 0.083   |  | 1.69          | 0.22 — 12.83 |  | 0.612   |  | 1.41  | 0.31 — 6.48  |  | 0.662   |  |
| Diabetes                                                         | 1.29               | 1.23 — 1.35 |  | <0.001  |  | 1.16          | 1.05 — 1.27  |  | 0.003   |  | 1.31  | 1.22 — 1.41  |  | <0.001  |  |
| Hypertension                                                     | 1.28               | 1.18 — 1.39 |  | <0.001  |  | 1.38          | 1.14 — 1.67  |  | 0.001   |  | 0.98  | 0.85 — 1.11  |  | 0.704   |  |
| Cardiovascular disease                                           | 1.71               | 1.62 — 1.80 |  | <0.001  |  | 1.96          | 1.75 — 2.21  |  | <0.001  |  | 1.25  | 1.14 — 1.36  |  | <0.001  |  |
| Heart failure                                                    | 1.68               | 1.60 — 1.77 |  | <0.001  |  | 1.58          | 1.44 — 1.74  |  | <0.001  |  | 1.33  | 1.23 — 1.43  |  | <0.001  |  |
| Alcohol use disorder                                             | 0.66               | 0.62 — 0.71 |  | <0.001  |  | 0.81          | 0.71 — 0.94  |  | 0.004   |  | 0.69  | 0.61 — 0.77  |  | <0.001  |  |
| Estimated glomerular filtration rate, ml/min/1.73 m <sup>2</sup> |                    |             |  |         |  |               |              |  |         |  |       |              |  |         |  |
| ≥ 90                                                             | ref                |             |  |         |  | ref           |              |  |         |  | ref   |              |  |         |  |
| 60-89                                                            | 0.98               | 0.92 — 1.05 |  | 0.625   |  | 1.05          | 0.91 — 1.20  |  | 0.538   |  | 1.14  | 1.01 — 1.29  |  | 0.041   |  |
| 45-59                                                            | 1.08               | 1.00 — 1.16 |  | 0.050   |  | 1.05          | 0.90 — 1.24  |  | 0.530   |  | 1.58  | 1.37 — 1.82  |  | <0.001  |  |
| 30-44                                                            | 1.21               | 1.10 — 1.32 |  | <0.001  |  | 1.20          | 1.00 — 1.44  |  | 0.055   |  | 2.00  | 1.72 — 2.33  |  | <0.001  |  |
| 15-29                                                            | 1.53               | 1.35 — 1.72 |  | <0.001  |  | 1.37          | 1.09 — 1.72  |  | 0.007   |  | 3.19  | 2.69 — 3.78  |  | <0.001  |  |
| <15 or dialysis                                                  | 1.64               | 1.42 — 1.90 |  | <0.001  |  | 1.95          | 1.52 — 2.50  |  | <0.001  |  | 3.01  | 2.44 — 3.73  |  | <0.001  |  |

Models additionally adjusted for month of diagnosis and geographic location by Veterans Integrated Service Network location; not adjusted for the presence of an active statin prescription six months prior to enrollment

**Figure Legend**

1  
2 Fig. 1. ORs and 95% confidence intervals for associations of statin use at study enrollment with A) hospitalization, B) ICU admission, and C) death  
3  
4 at 30 days before and after adjustment for statin use six months prior to diagnosis among VHA Veterans with and without a positive respiratory  
5  
6 swab for SARS-CoV-2. All analyses are adjusted for sex, age, race/ethnicity, BMI, tobacco use, facility location, urban/rural status, eGFR, and  
7  
8 history of diabetes, hypertension, cardiovascular disease, heart failure, and alcohol use disorder.  
9  
10  
11  
12  
13  
14  
15  
16  
17  
18  
19  
20  
21  
22  
23  
24  
25  
26  
27  
28  
29  
30  
31  
32  
33  
34  
35  
36  
37  
38  
39  
40  
41  
42  
43  
44  
45  
46  
47

For peer review only



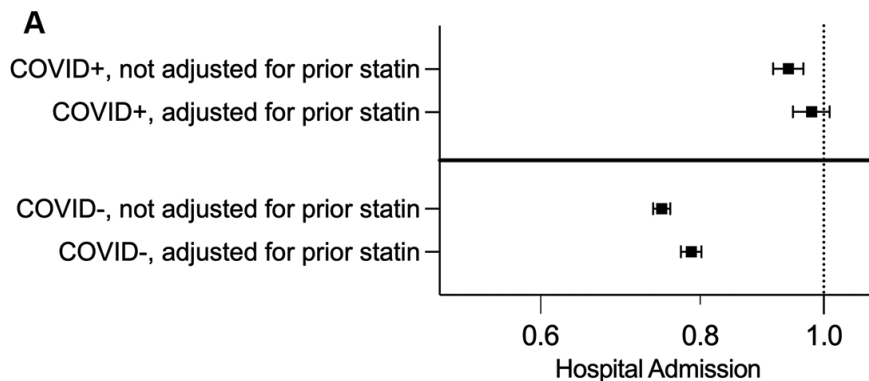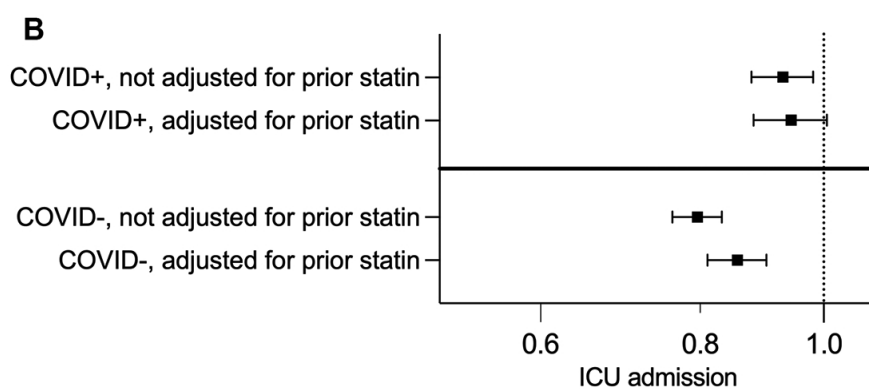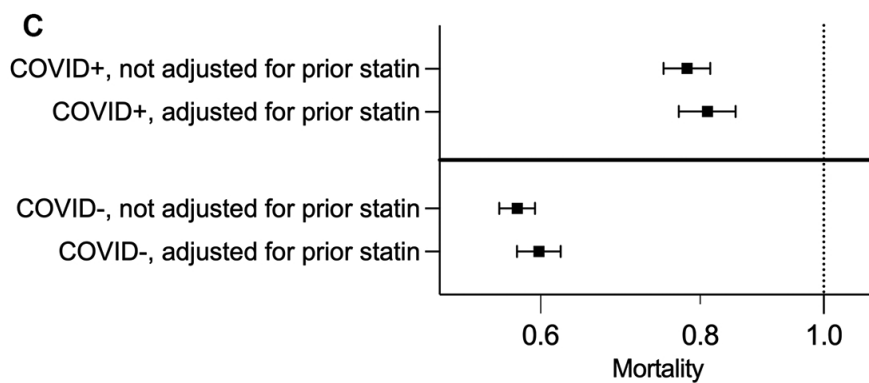

239x322mm (118 x 118 DPI)

STROBE Statement—Checklist of items that should be included in reports of *cohort studies*

|                              | Item No | Recommendation                                                                                                                                                                                                                                                                                                         | Page No |
|------------------------------|---------|------------------------------------------------------------------------------------------------------------------------------------------------------------------------------------------------------------------------------------------------------------------------------------------------------------------------|---------|
| <b>Title and abstract</b>    | 1       | (a) Indicate the study's design with a commonly used term in the title or the abstract<br>(b) Provide in the abstract an informative and balanced summary of what was done and what was found                                                                                                                          | 1       |
| <b>Introduction</b>          |         |                                                                                                                                                                                                                                                                                                                        |         |
| Background/rationale         | 2       | Explain the scientific background and rationale for the investigation being reported                                                                                                                                                                                                                                   | 4       |
| Objectives                   | 3       | State specific objectives, including any prespecified hypotheses                                                                                                                                                                                                                                                       | 4       |
| <b>Methods</b>               |         |                                                                                                                                                                                                                                                                                                                        |         |
| Study design                 | 4       | Present key elements of study design early in the paper                                                                                                                                                                                                                                                                | 4       |
| Setting                      | 5       | Describe the setting, locations, and relevant dates, including periods of recruitment, exposure, follow-up, and data collection                                                                                                                                                                                        | 5       |
| Participants                 | 6       | (a) Give the eligibility criteria, and the sources and methods of selection of participants. Describe methods of follow-up<br>(b) For matched studies, give matching criteria and number of exposed and unexposed                                                                                                      | 5       |
| Variables                    | 7       | Clearly define all outcomes, exposures, predictors, potential confounders, and effect modifiers. Give diagnostic criteria, if applicable                                                                                                                                                                               | 6       |
| Data sources/<br>measurement | 8*      | For each variable of interest, give sources of data and details of methods of assessment (measurement). Describe comparability of assessment methods if there is more than one group                                                                                                                                   | 6       |
| Bias                         | 9       | Describe any efforts to address potential sources of bias                                                                                                                                                                                                                                                              | 6       |
| Study size                   | 10      | Explain how the study size was arrived at                                                                                                                                                                                                                                                                              | 5       |
| Quantitative variables       | 11      | Explain how quantitative variables were handled in the analyses. If applicable, describe which groupings were chosen and why                                                                                                                                                                                           | 6       |
| Statistical methods          | 12      | (a) Describe all statistical methods, including those used to control for confounding<br>(b) Describe any methods used to examine subgroups and interactions<br>(c) Explain how missing data were addressed<br>(d) If applicable, explain how loss to follow-up was addressed<br>(e) Describe any sensitivity analyses | 6       |
| <b>Results</b>               |         |                                                                                                                                                                                                                                                                                                                        |         |
| Participants                 | 13*     | (a) Report numbers of individuals at each stage of study—eg numbers potentially eligible, examined for eligibility, confirmed eligible, included in the study, completing follow-up, and analysed<br>(b) Give reasons for non-participation at each stage<br>(c) Consider use of a flow diagram                        | 7       |
| Descriptive data             | 14*     | (a) Give characteristics of study participants (eg demographic, clinical, social) and information on exposures and potential confounders<br>(b) Indicate number of participants with missing data for each variable of interest<br>(c) Summarise follow-up time (eg, average and total amount)                         | 7       |
| Outcome data                 | 15*     | Report numbers of outcome events or summary measures over time                                                                                                                                                                                                                                                         | 7       |

|    |                          |    |                                                                                                                                                                                                              |    |
|----|--------------------------|----|--------------------------------------------------------------------------------------------------------------------------------------------------------------------------------------------------------------|----|
| 1  | Main results             | 16 | (a) Give unadjusted estimates and, if applicable, confounder-adjusted estimates and their precision (eg, 95% confidence interval). Make clear which confounders were adjusted for and why they were included | 8  |
| 2  |                          |    | (b) Report category boundaries when continuous variables were categorized                                                                                                                                    |    |
| 3  |                          |    | (c) If relevant, consider translating estimates of relative risk into absolute risk for a meaningful time period                                                                                             |    |
| 4  |                          |    |                                                                                                                                                                                                              |    |
| 5  |                          |    |                                                                                                                                                                                                              |    |
| 6  |                          |    |                                                                                                                                                                                                              |    |
| 7  |                          |    |                                                                                                                                                                                                              |    |
| 8  |                          |    |                                                                                                                                                                                                              |    |
| 9  | Other analyses           | 17 | Report other analyses done—eg analyses of subgroups and interactions, and sensitivity analyses                                                                                                               | 8  |
| 10 |                          |    |                                                                                                                                                                                                              |    |
| 11 | <b>Discussion</b>        |    |                                                                                                                                                                                                              |    |
| 12 |                          |    |                                                                                                                                                                                                              |    |
| 13 | Key results              | 18 | Summarise key results with reference to study objectives                                                                                                                                                     | 8  |
| 14 | Limitations              | 19 | Discuss limitations of the study, taking into account sources of potential bias or imprecision. Discuss both direction and magnitude of any potential bias                                                   | 10 |
| 15 |                          |    |                                                                                                                                                                                                              |    |
| 16 | Interpretation           | 20 | Give a cautious overall interpretation of results considering objectives, limitations, multiplicity of analyses, results from similar studies, and other relevant evidence                                   | 9  |
| 17 |                          |    |                                                                                                                                                                                                              |    |
| 18 |                          |    |                                                                                                                                                                                                              |    |
| 19 | Generalisability         | 21 | Discuss the generalisability (external validity) of the study results                                                                                                                                        | 10 |
| 20 |                          |    |                                                                                                                                                                                                              |    |
| 21 | <b>Other information</b> |    |                                                                                                                                                                                                              |    |
| 22 | Funding                  | 22 | Give the source of funding and the role of the funders for the present study and, if applicable, for the original study on which the present article is based                                                | 3  |
| 23 |                          |    |                                                                                                                                                                                                              |    |
| 24 |                          |    |                                                                                                                                                                                                              |    |

\*Give information separately for exposed and unexposed groups.

**Note:** An Explanation and Elaboration article discusses each checklist item and gives methodological background and published examples of transparent reporting. The STROBE checklist is best used in conjunction with this article (freely available on the Web sites of PLoS Medicine at <http://www.plosmedicine.org/>, Annals of Internal Medicine at <http://www.annals.org/>, and Epidemiology at <http://www.epidem.com/>). Information on the STROBE Initiative is available at <http://www.strobe-statement.org>.
